# Supplementary material for: Development of PCR primers enabling the design of flexible sticky ends for efficient concatenation of long DNA fragments
Source: Royal Society of Chemistry journal article supplement (doi:10.1039/d3cb00212h), 2024-01-01
Supplement: d3cb00212h1.pdf [file d3cb00212h1.pdf]

## Supporting information

### Development of PCR Primer Enabling the Design of Flexible Sticky Ends for Efficient Concatenation of Long DNA Fragments

Kohei Nomura,<sup>a</sup> Kaoru Onda,<sup>a</sup> Hiroataka Murase,<sup>a</sup> Fumitaka Hashiya,<sup>b</sup> Yukiteru Ono,<sup>c</sup> Goro Terai,<sup>c</sup> Natsuhisa Oka,<sup>d</sup> Kiyoshi Asai,<sup>c</sup> Daisuke Suzuki,<sup>a</sup> Naho Takahashi,<sup>a</sup> Haruka Hiraoka,<sup>a</sup> Masahito Inagaki,<sup>a</sup> Yasuaki Kimura,<sup>a</sup> Yoshihiro Shimizu,<sup>c</sup> Naoko Abe<sup>a</sup> and Hiroshi Abe<sup>\*abfg</sup>

<sup>a</sup>Department of Chemistry, Graduate School of Science, Nagoya University, Furo-cho, Chikusa-ku, Nagoya, Aichi 464-8602, Japan. Email: h-abe@chem.nagoya-u.ac.jp

<sup>b</sup>Research Center for Materials Science, Nagoya University, Furo-cho, Chikusa-ku, Nagoya, Aichi 464-8602, Japan

<sup>c</sup>Department of Computational Biology and Medical Sciences, Graduate School of Frontier Sciences, Uni-versity of Tokyo, Kashiwanoha, Kashiwa, Chiba 277-8561, Japan

<sup>d</sup>Department of Chemistry and Biomolecular Science Faculty of Engineering, Gifu University, Gifu 501-1193, Japan

<sup>e</sup>Laboratory for Cell-Free Protein Synthesis, RIKEN Center for Biosystems Dynamics Research, Suita, Osaka 565-0874, Japan

<sup>f</sup>CREST, Japan Science and Technology Agency, 7 Gobancho, Chiyoda-ku, Tokyo 102-0076, Japan

<sup>g</sup>Institute for Glyco-core Research (iGCORE), Nagoya University, Furo-cho, Chikusa-ku, Nagoya, Aichi 464-8601, Japan

\*Corresponding authors

#### Contents

|                                              |     |
|----------------------------------------------|-----|
| Experimental procedure and NMR spectra ..... | S2  |
| Supplementary Fig. S1 .....                  | S65 |
| Supplementary Fig. S2 .....                  | S66 |
| Supplementary Fig. S3 .....                  | S67 |

## General experimental details

### Material

Reagents and solvents were purchased as reagent-grade, first-grade, or special-grade from TCI, FUJIFILM Wako, KANTO CHEMICAL and Sigma-Aldrich unless otherwise stated. All were used without further purification. Sterile water used in this research was produced by MicroPure UV (Thermo SCIENTIFIC) and Pacific TII 3 UV (Thermo SCIENTIFIC). For TLC, Silicagel 70 F254 TLC Plate-Wako was used. For silica gel column chromatography, Silica Gel 60 (spherical) 40-50  $\mu\text{m}$  (KANTO CHEMICAL) was used.

### NMR and MS spectra

NMR spectra were measured using JNM-ECS400 (JEOL) (400 MHz). The chemical shift values of  $^1\text{H}$ -NMR spectra were adjusted using the residual proton of the solvent (chloroform: 7.26 ppm, DMSO: 2.50 ppm) as an internal standard. The chemical shift values of  $^{13}\text{C}$ -NMR spectra were adjusted using the signals from the measured solvents (chloroform: 77.16 ppm, DMSO: 39.52 ppm) as an internal standard. The chemical shift values of  $^{31}\text{P}$ -NMR spectra were not standardized. The multiplicity of the signal is shown as s: singlet, d: doublet, t: triplet, q: quartet, sext: sextet, m: multiplet. MS spectra were measured using compact (Bruker) (ESI-MS).

## Synthesis of phosphoramidite with *o*-nitrobenzyl group

### Compound 1

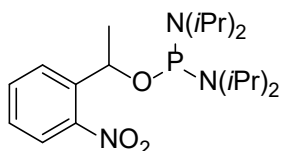

Bis(diisopropylamino)chlorophosphine (800 mg, 3.00 mmol, 1.0 eq.) and triethylamine (1.9 mL, 13.5 mmol, 4.5 eq.) were dissolved in THF (30 mL) and stirred at  $-10\text{ }^\circ\text{C}$ . To the mixture, 1-(2-nitrophenyl)ethanol (431  $\mu\text{L}$ , 3.20 mmol, 1.05 eq.) in THF (10 mL) was added dropwise then stirred at room temperature overnight. After that, the reaction mixture was filtered and concentrated. The crude was purified by silica gel column chromatography (Hexane/AcOEt = 1/1 with 3% TEA) and Compound **1** (770 mg, 1.94 mmol, 65%) was obtained.  $^1\text{H}$ -NMR (392 MHz,  $\text{CDCl}_3$ ):  $\delta$  7.922-7.872 (m, 2H), 7.627-7.585 (m, 1H), 7.384-7.341 (m, 1H), 5.349 (sext,  $J = 6.4$  Hz, 1H), 3.602-3.411 (m, 4H), 1.549 (d,  $J = 6.4$  Hz, 3H), 1.210-1.000 (m, 24H);  $^{13}\text{C}$ -NMR (99 MHz,  $\text{CDCl}_3$ ):  $\delta$  142.318, 133.314, 128.822, 127.496, 123.968, 67.058, 44.778, 25.350, 24.263;  $^{31}\text{P}$ -NMR (159 MHz,  $\text{CDCl}_3$ ): 113.234; HRMS (ESI) calc.  $m/z$  398.2567 ( $\text{M} + \text{H}^+$ ), found  $m/z$  398.2600 ( $\text{M} + \text{H}^+$ ).

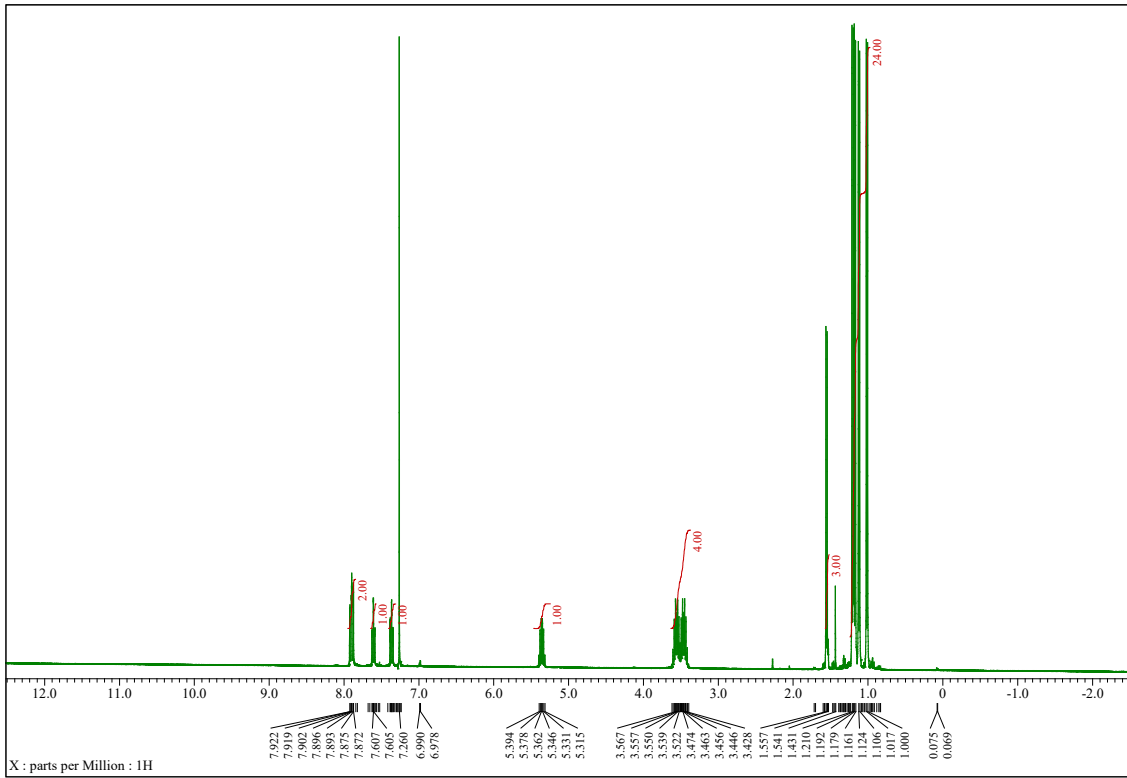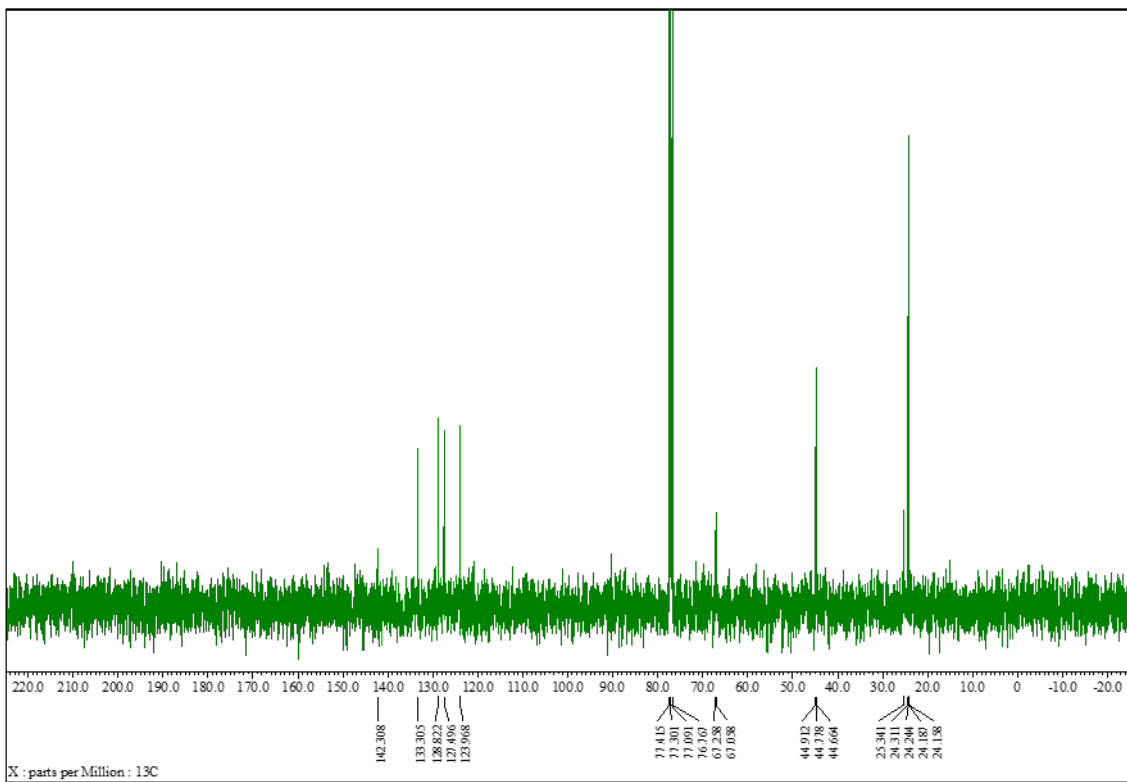

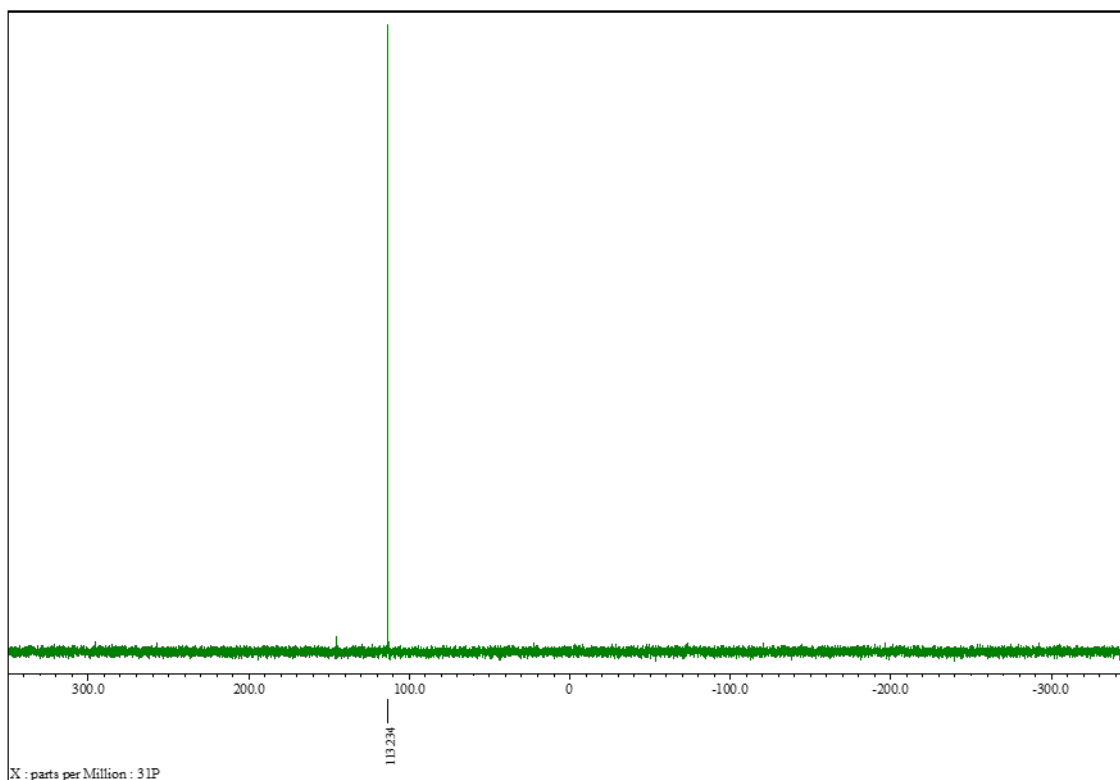

### Compound 2

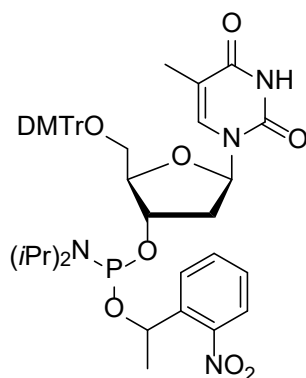

2'-deoxy-5'-*O*-(4,4'-dimethoxytrityl)-thymidine (343 mg, 0.63 mmol, 1.0 eq.) was dissolved in DCM (1.7 mL) and stirred at 0 °C. To the solution, Compound 1 (300 mg, 0.75 mmol, 1.2 eq.) and 1*H*-tetrazole (53.0 mg, 0.75 mmol, 1.2 eq.) were added then stirred at room temperature. After 4 hours, the reaction mixture was loaded onto a silica gel column directly. The product was purified by silica gel column chromatography (Hexane/AcOEt = 1/1 with 3% TEA) and compound 2 (309 mg, 0.37 mmol, 58%) was obtained. <sup>1</sup>H-NMR (392 MHz, CDCl<sub>3</sub>) (diastereomixture): δ 7.886-7.471 (m, 4H), 7.402-7.172 (m, 10H), 6.825-6.769 (m, 4H), 6.450-6.415, 6.258-6.198 (m, 1H), 5.509-5.378 (m, 1H), 4.677-4.645, 4.498-4.436 (m, 1H), 4.263-3.914 (m, 1H), 3.771-3.759 (m, 6H), 3.636-3.176 (m, 4H), 2.580-2.130 (m, 2H), 1.578-0.836 (m, 18H); <sup>13</sup>C-NMR (99 MHz, CDCl<sub>3</sub>): δ 163.720, 158.798,

144.340, 135.813, 135.355, 133.591, 133.362, 130.205, 128.651, 128.574, 128.250, 128.183, 128.069, 127.983, 127.239, 124.034, 113.333, 111.264, 87.039, 85.474, 81.564, 77.310, 67.172, 63.462, 55.327, 43.290, 40.267, 24.606, 14.287, 11.759;  $^{31}\text{P}$ -NMR (159 MHz,  $\text{CDCl}_3$ ): 148.752, 147.817, 147.710; HRMS (ESI) calc.  $m/z$  863.3392 ( $\text{M} + \text{Na}^+$ ), found  $m/z$  863.3415 ( $\text{M} + \text{Na}^+$ ).

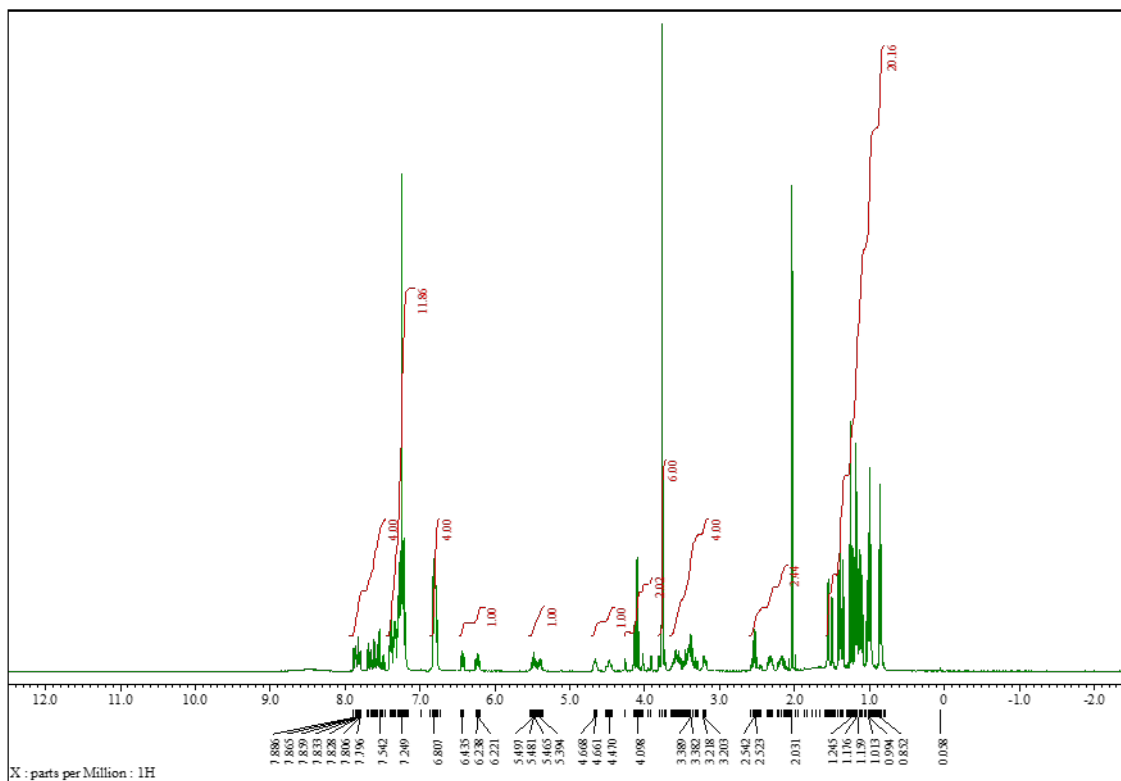

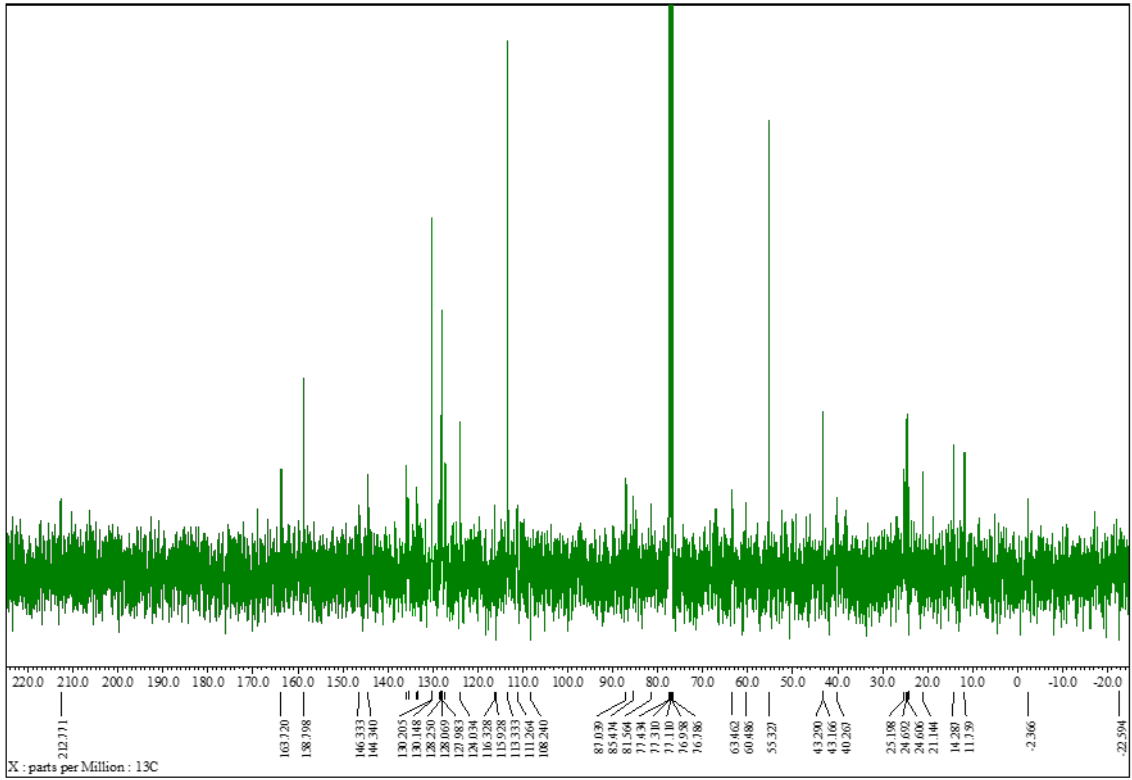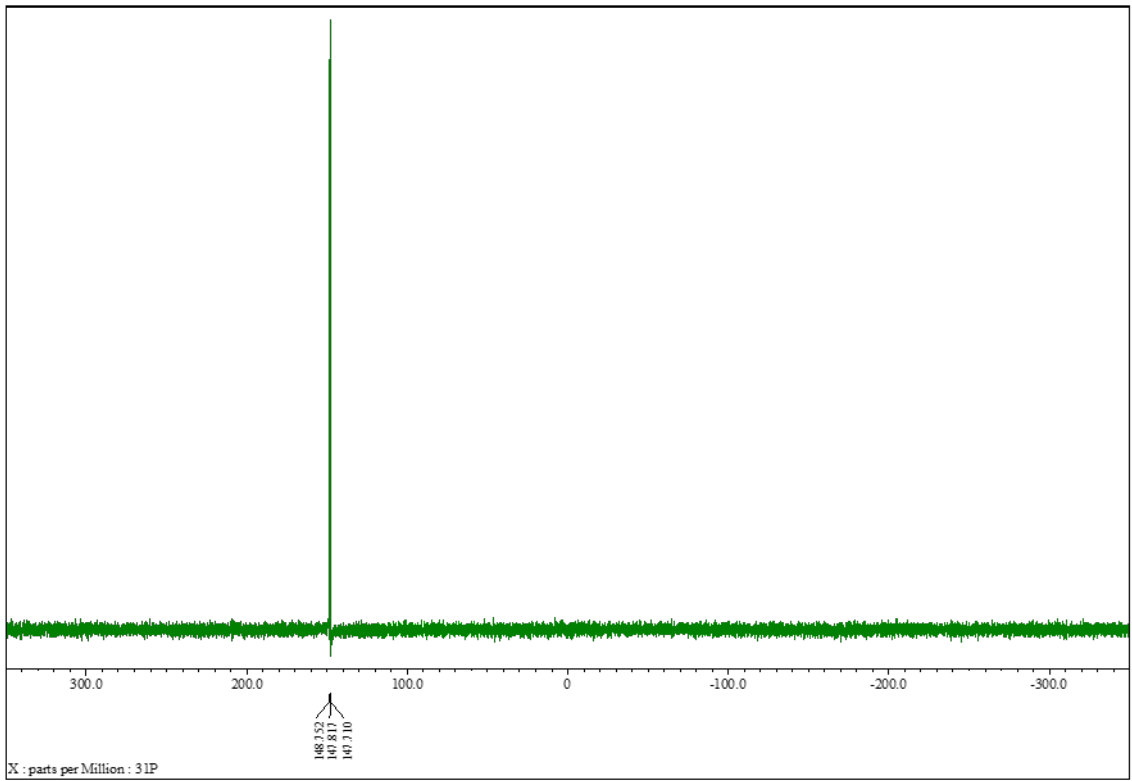

### Compound 3

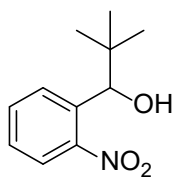

1-iodo-2-nitrobenzene (25.0 g, 100 mmol, 1.0 eq.) was dissolved in THF (150 mL) and cooled to -40 °C. 2 M phenylmagnesium chloride in THF solution (55.2 mL, 110 mmol, 1.1 eq.) was added dropwise and stirred at -40 °C. After stirring for 2 h, pivalaldehyde (10.9 mL, 100 mmol, 1.0 eq.) was added dropwise and stirred at -40 °C. After stirring for 6 h, saturated NH<sub>4</sub>Cl aqueous solution (200 mL) was added and warmed to room temperature. Brine (100 mL) was added and extracted with AcOEt. The organic layer was dried with Na<sub>2</sub>SO<sub>4</sub>, filtered, and concentrated in vacuo. The crude product was purified by silica gel column chromatography (Hexane/DCM = 94/6→80/20→6/94) and Compound **3** (15.5785 g, 74.5 mmol, 74%) was obtained. <sup>1</sup>H-NMR (392 MHz, CDCl<sub>3</sub>): δ 7.797 (dd, *J* = 8.0, 1.6 Hz, 1H), 7.735 (dd, *J* = 8.2, 1.0 Hz, 1H), 7.604-7.561 (m, 1H), 7.413-7.370 (m, 1H), 5.361 (d, *J* = 3.2 Hz, 1H), 2.154 (d, *J* = 3.6 Hz, 1H), 0.874 (s, 9H); <sup>13</sup>C-NMR (99 MHz, CDCl<sub>3</sub>): δ 149.693, 136.348, 131.941, 129.814, 128.022, 123.769, 74.401, 36.751, 25.590; HRMS (ESI) calc. *m/z* 232.0944 (M + Na<sup>+</sup>), found *m/z* 232.0996 (M + Na<sup>+</sup>).

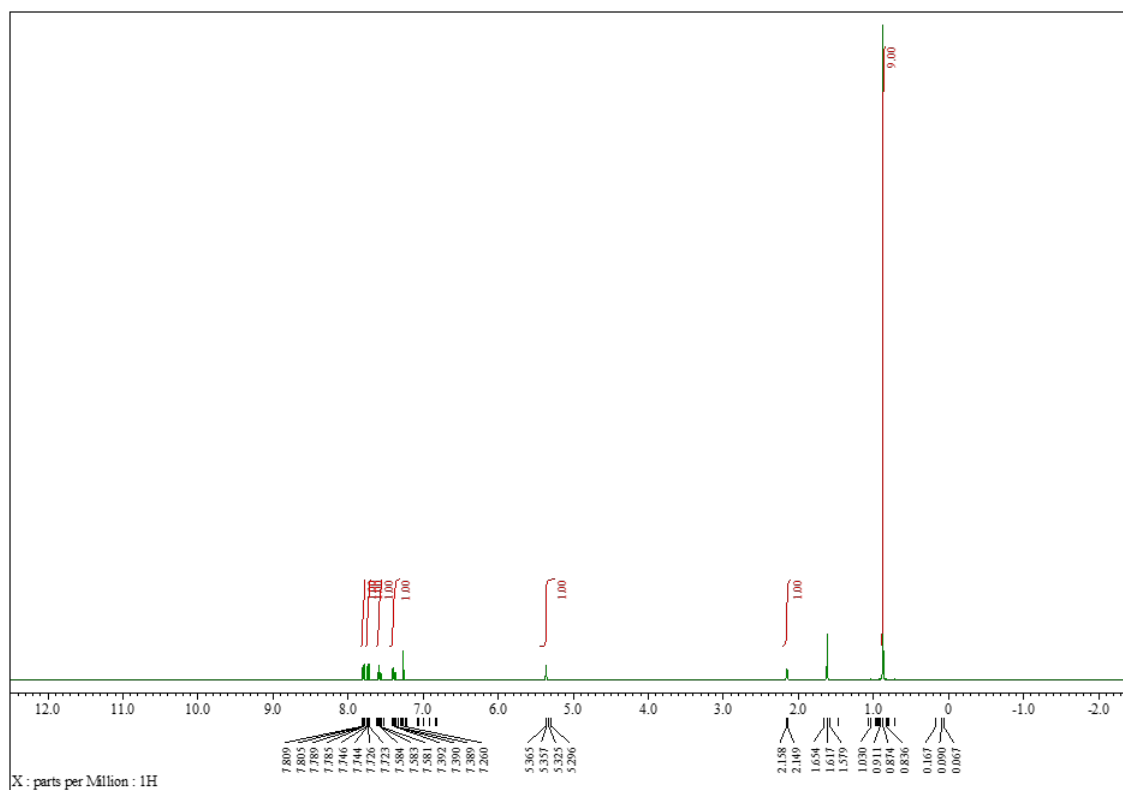

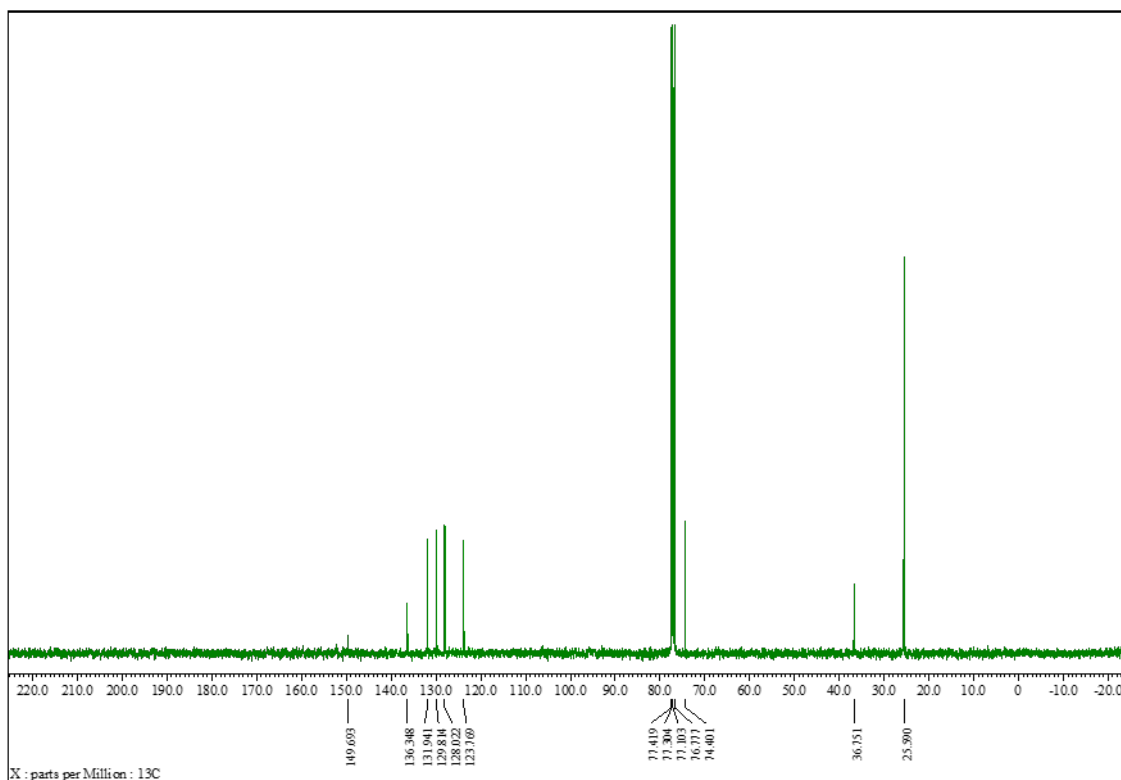

#### Compound 4

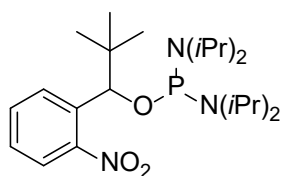

Compound **3** (3.00 g, 14.3 mmol, 1.0 eq.) was co-evaporated with pyridine and dissolved in THF (70 mL). Triethylamine (8.94 mL, 64.5 mmol, 4.5 eq.) was added and stirred at 0 °C. Bis(diisopropylamino)chlorophosphine (4.78 g, 17.9 mmol, 1.25 eq.) was added and stirred at 0 °C. After stirring for 1 h, stirring was further continued at room temperature for 17 h, then the reaction mixture was concentrated in vacuo. The crude product was purified by silica gel column chromatography (Hexane/AcOEt = 97/3→84:16 with 1% TEA) and Compound **4** (3.30 g, 7.51 mmol, 52%) was obtained.  $^1\text{H-NMR}$  (392 MHz,  $\text{CDCl}_3$ ):  $\delta$  7.891-7.721 (m, 2H), 7.556 (t,  $J = 7.8$  Hz, 1H), 7.382-7.342 (m, 1H), 5.494 (2s, 1H), 3.655-3.511 (m, 2H), 3.497-3.402 (m, 2H), 1.209 (d,  $J = 6.8$  Hz, 6H), 1.175 (d,  $J = 6.8$  Hz, 6H), 1.138 (d,  $J = 7.2$  Hz, 6H), 1.048 (d,  $J = 7.2$  Hz, 6H), 0.903 (s, 9H);  $^{13}\text{C-NMR}$  (99 MHz,  $\text{CDCl}_3$ ):  $\delta$  149.280, 137.549, 131.788, 131.426, 127.554, 124.301, 75.908, 45.207, 37.749, 26.218, 24.645;  $^{31}\text{P-NMR}$  (159 MHz,  $\text{CDCl}_3$ ):  $\delta$  111.738; HRMS (ESI) calc.  $m/z$  440.3037 ( $\text{M} + \text{H}^+$ ), found  $m/z$  440.3032 ( $\text{M} + \text{H}^+$ ).



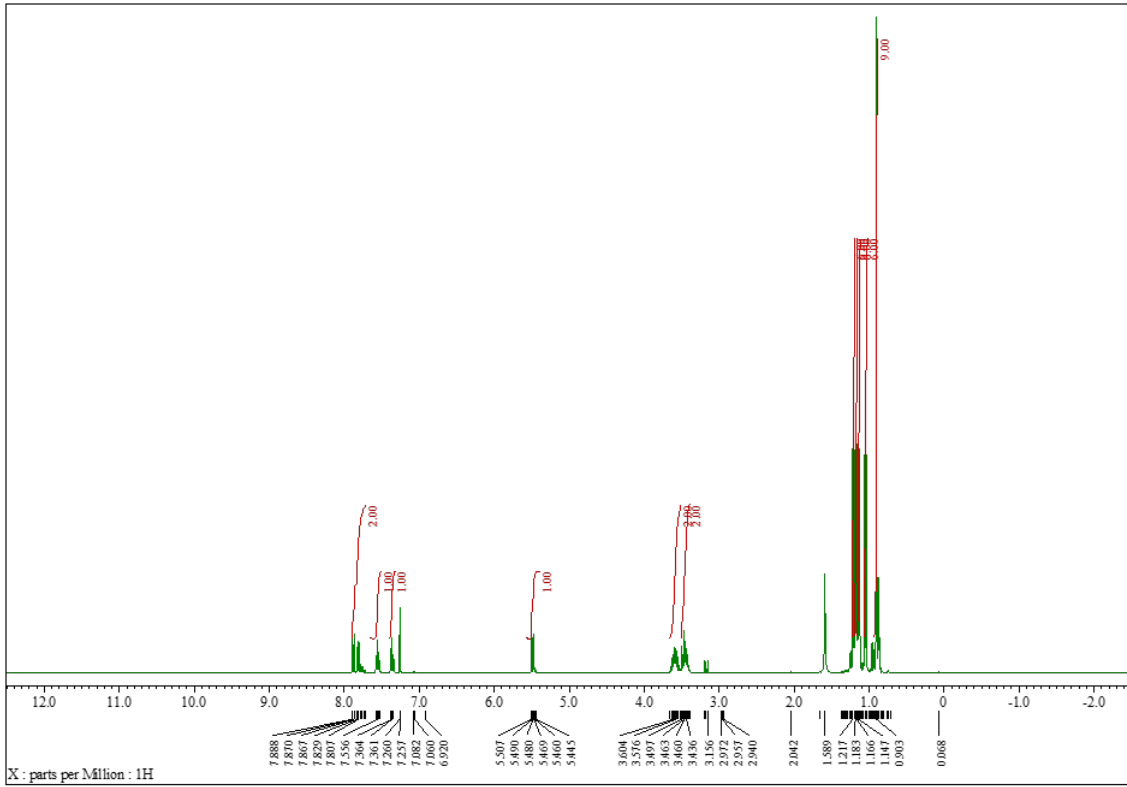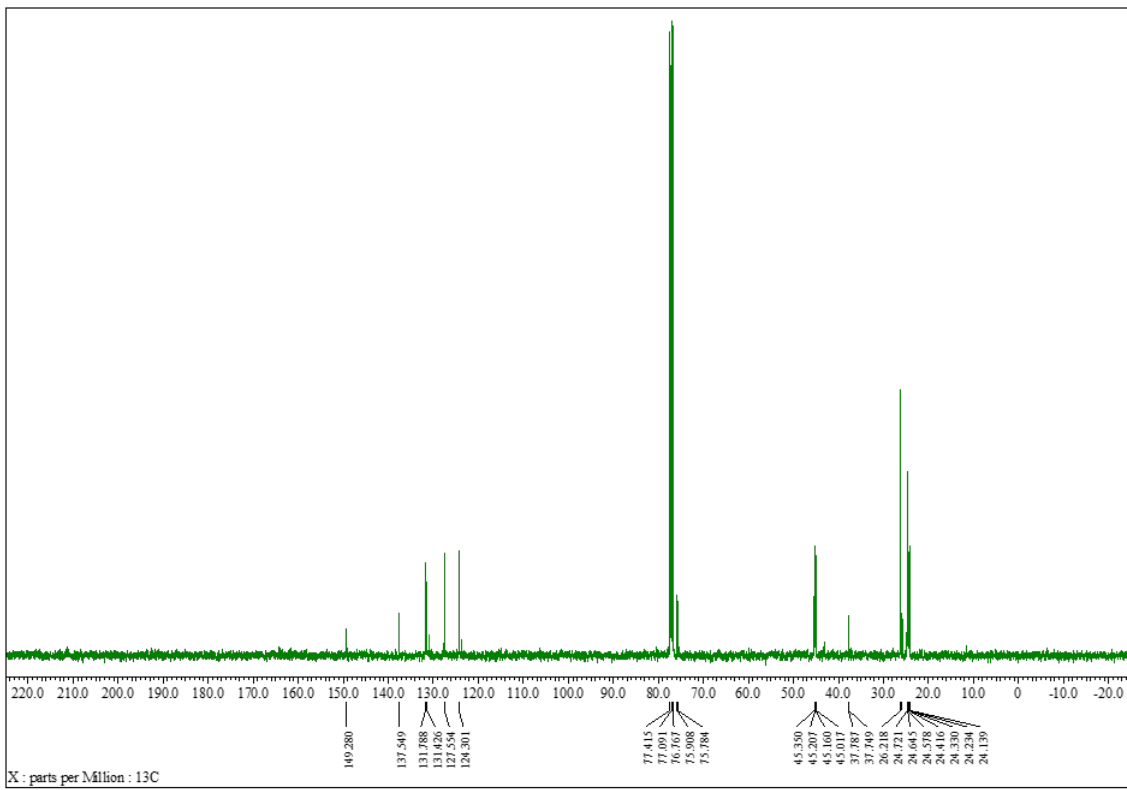

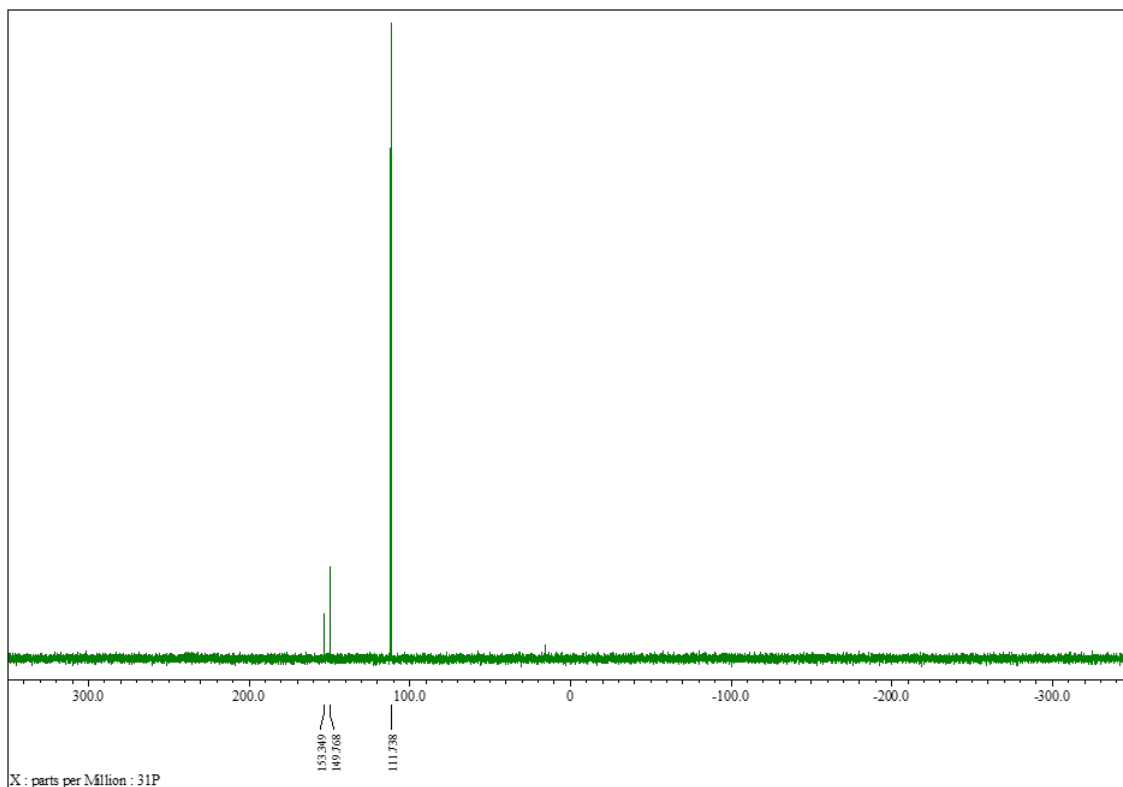

### Compound 5

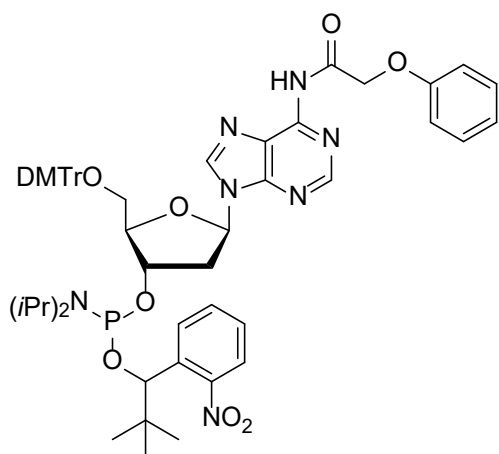

Compound 4 (2.56 g, 5.82 mmol, 2.0 eq.) and 5-(methylthio)-1*H*-tetrazole (1.01 g, 8.70 mmol, 3.0 eq.) were dissolved in DCM (7.5 mL). To the solution, 2'-deoxy-5'-*O*-(4,4'-dimethoxytrityl)-*N*6-phenoxycetyladenosine (2.00 g, 2.91 mmol, 1.0 eq.) was added at 0 °C, then stirred at room temperature for 6 hours. Afterwards, AcOEt (200 mL) was added to the reaction mixture then washed with saturated NaHCO<sub>3</sub> aqueous solution and brine. The organic layer was dried with Na<sub>2</sub>SO<sub>4</sub>, filtered, and concentrated in vacuo. The crude product was purified by silica gel column chromatography (Hexane/AcOEt = 2/1 → 1/1 with 1% TEA) and Compound 5 (1.10 g, 1.07 mmol, 37 %) was obtained.

$^1\text{H-NMR}$  (392 MHz,  $\text{CDCl}_3$ ) (diastereomixture):  $\delta$  9.494 (br, 1H), 8.716-8.688 (m, 1H), 8.211-8.009 (m, 1H), 7.758-7.002 (m, 18H), 6.775-6.719 (m, 4H), 6.557-6.490, 5.931-5.722 (m, 1H), 5.491-5.393 (m, 1H), 4.857-4.487 (m, 3H), 4.336-4.306, 3.950-3.840 (m, 1H), 3.755-3.733 (m, 6H), 3.702-3.133 (m, 4H), 3.068-2.181 (m, 2H), 1.304-1.273 (m, 3H), 1.182-0.815 (m, 18H);  $^{13}\text{C-NMR}$  (99 MHz,  $\text{CDCl}_3$ ):  $\delta$  166.839, 158.598, 157.177, 152.361, 151.569, 149.442, 148.269, 144.616, 142.404, 141.917, 135.651, 131.483, 131.178, 130.119, 129.900, 128.155, 127.878, 127.811, 126.953, 123.910, 123.128, 122.451, 115.041, 113.200, 85.524, 84.750, 77.434, 75.718, 73.562, 68.240, 63.650, 55.279, 43.367, 39.504, 37.129, 25.675, 24.625;  $^{31}\text{P-NMR}$  (159 MHz,  $\text{CDCl}_3$ ): 152.601, 151.558, 148.164, 147.656; HRMS (ESI) calc.  $m/z$  1026.4525 ( $\text{M} + \text{H}^+$ ), found  $m/z$  1026.4514 ( $\text{M} + \text{H}^+$ ).

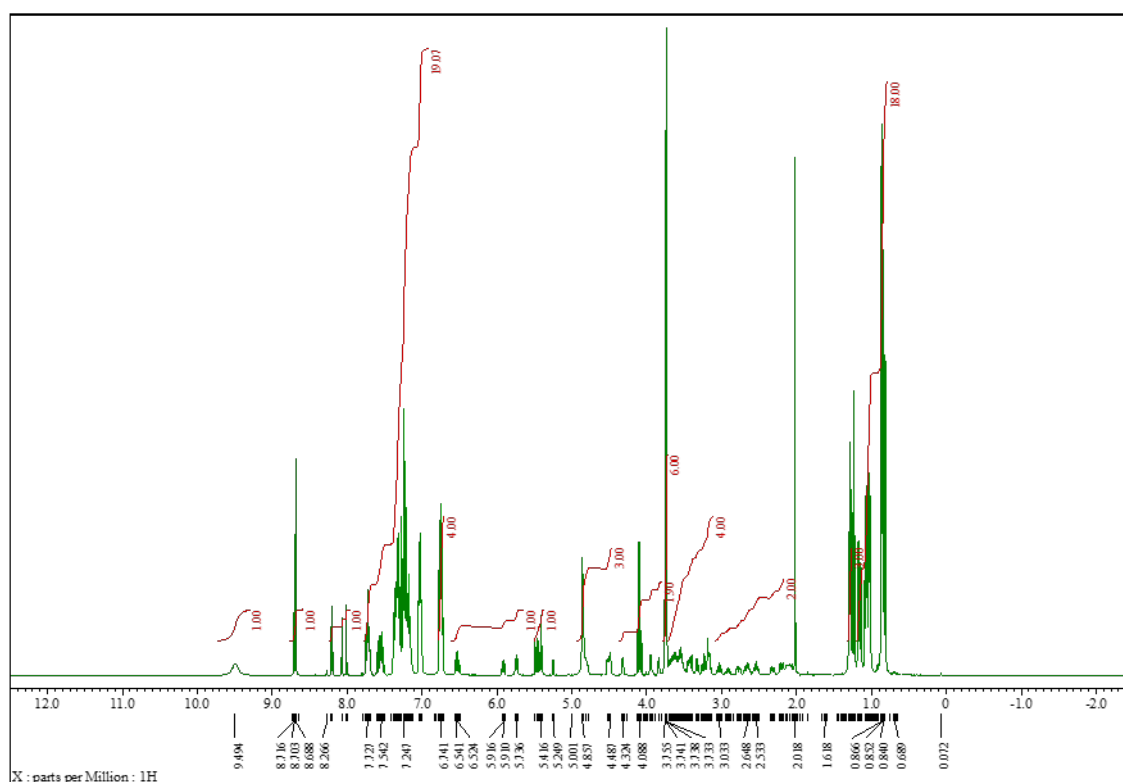

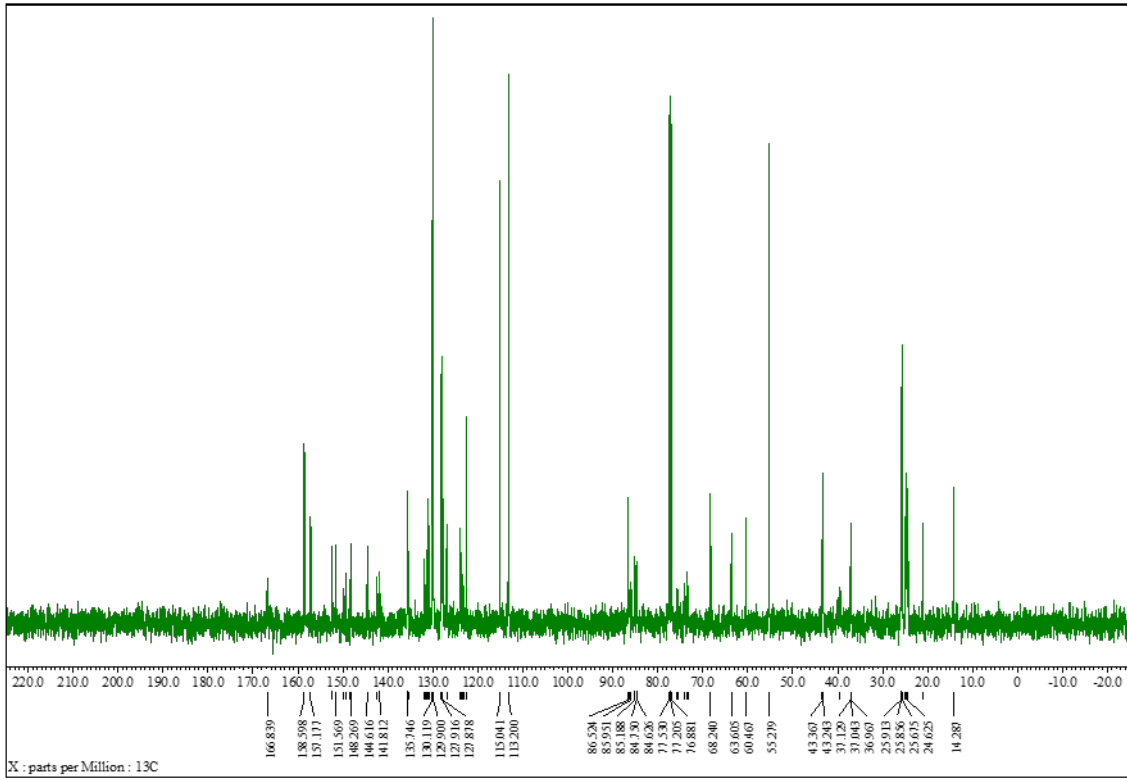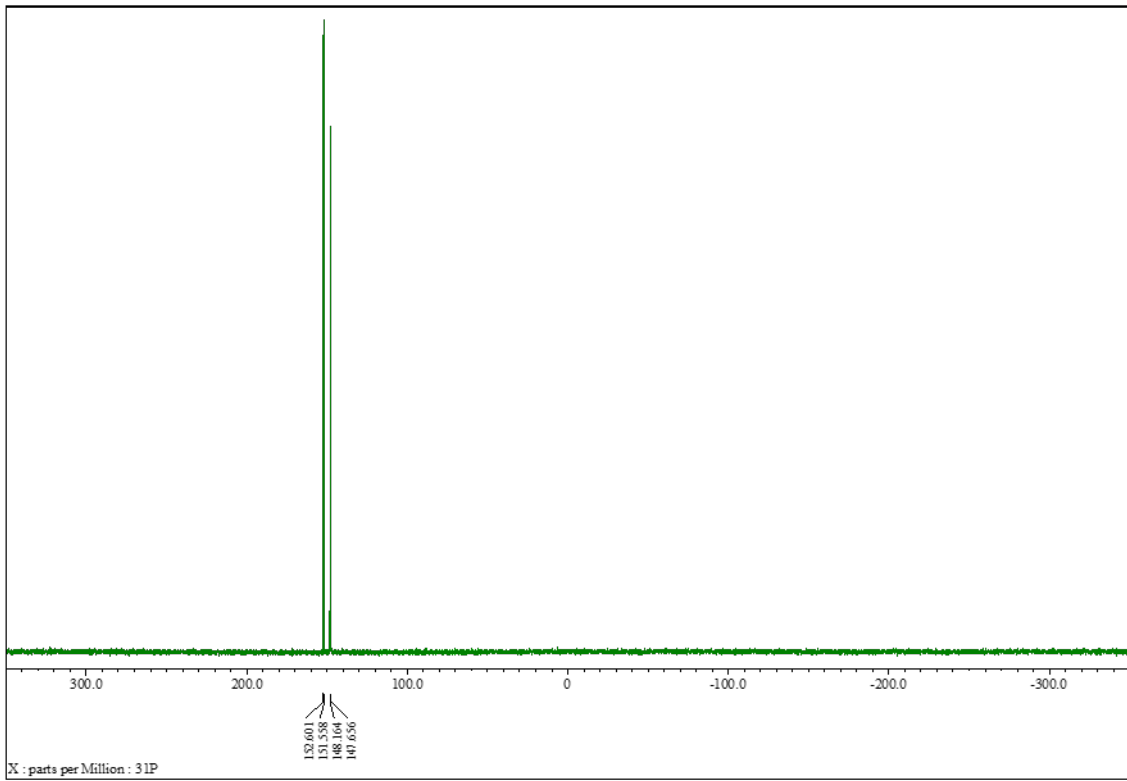

## Compound 6

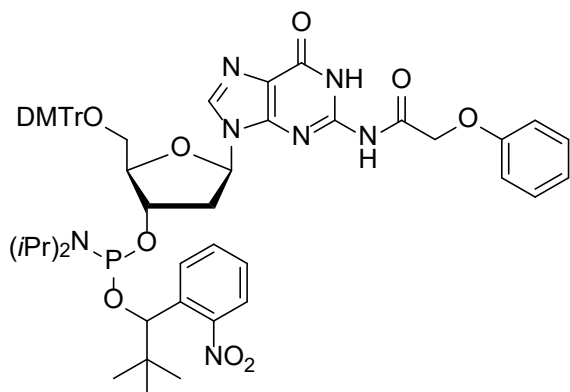

Compound 4 (2.50 g, 5.68 mmol, 2.0 eq.) and 5-(methylthio)-1*H*-tetrazole (0.990 g, 8.53 mmol, 3.0 eq.) were dissolved in DCM (10 mL). To the solution, 2'-deoxy-5'-*O*-(4,4'-dimethoxytrityl)-*N*2-phenoxyacetylguanosine (2.00 g, 2.84 mmol, 1.0 eq.) was added at 0 °C, then stirred at room temperature for 6 hours. Afterwards, AcOEt (200 mL) was added to the reaction mixture then washed with saturated NaHCO<sub>3</sub> aqueous solution and brine. The organic layer was dried with Na<sub>2</sub>SO<sub>4</sub>, filtered, and concentrated in vacuo. The crude product was purified by silica gel column chromatography (Hexane/AcOEt = 2/1 → 1/1 with 1% TEA) and Compound 6 (1.20 g, 1.15 mmol, 41 %) was obtained. <sup>1</sup>H-NMR (392 MHz, CDCl<sub>3</sub>) (diastereomixture): δ 7.856-7.483 (m, 4H), 7.402-7.152 (m, 12H), 7.086-6.914 (m, 3H), 6.787-6.749 (m, 4H), 6.387-6.279, 5.802-5.686 (m, 1H), 5.458-5.301 (m, 1H), 4.738-4.613, 4.424-4.284, 3.928 (m, 4H), 3.795-3.711 (m, 6H), 3.689-3.510 (m, 2H), 3.399-3.289 (m, 1H), 3.171-3.080 (m, 1H), 2.762-2.551, 2.509-2.440, 2.157-2.088 (m, 2H), 1.322-0.822 (m, 21H); <sup>13</sup>C-NMR (99 MHz, CDCl<sub>3</sub>): δ 170.186, 158.627, 156.662, 149.690, 148.727, 146.676, 144.549, 144.321, 137.082, 135.909, 135.603, 131.874, 130.692, 130.053, 129.890, 128.155, 127.954, 127.764, 126.991, 123.968, 122.957, 122.012, 114.878, 113.238, 86.476, 85.999, 84.387, 83.548, 73.610, 67.086, 63.872, 55.307, 43.262, 40.362, 37.043, 25.608, 24.635; <sup>31</sup>P-NMR (159 MHz, CDCl<sub>3</sub>): 151.050, 150.783, 147.282, 146.962; HRMS (ESI) calc. *m/z* 1064.4294 (M + Na<sup>+</sup>), found *m/z* 1064.4245 (M + Na<sup>+</sup>).

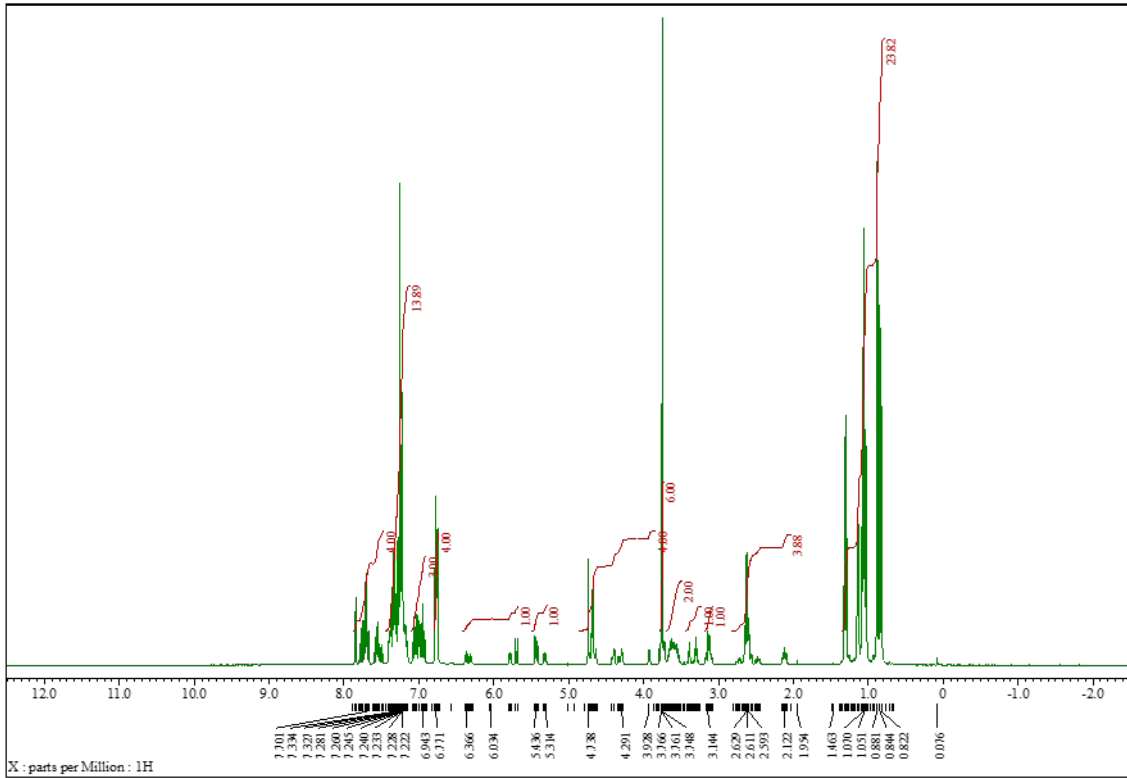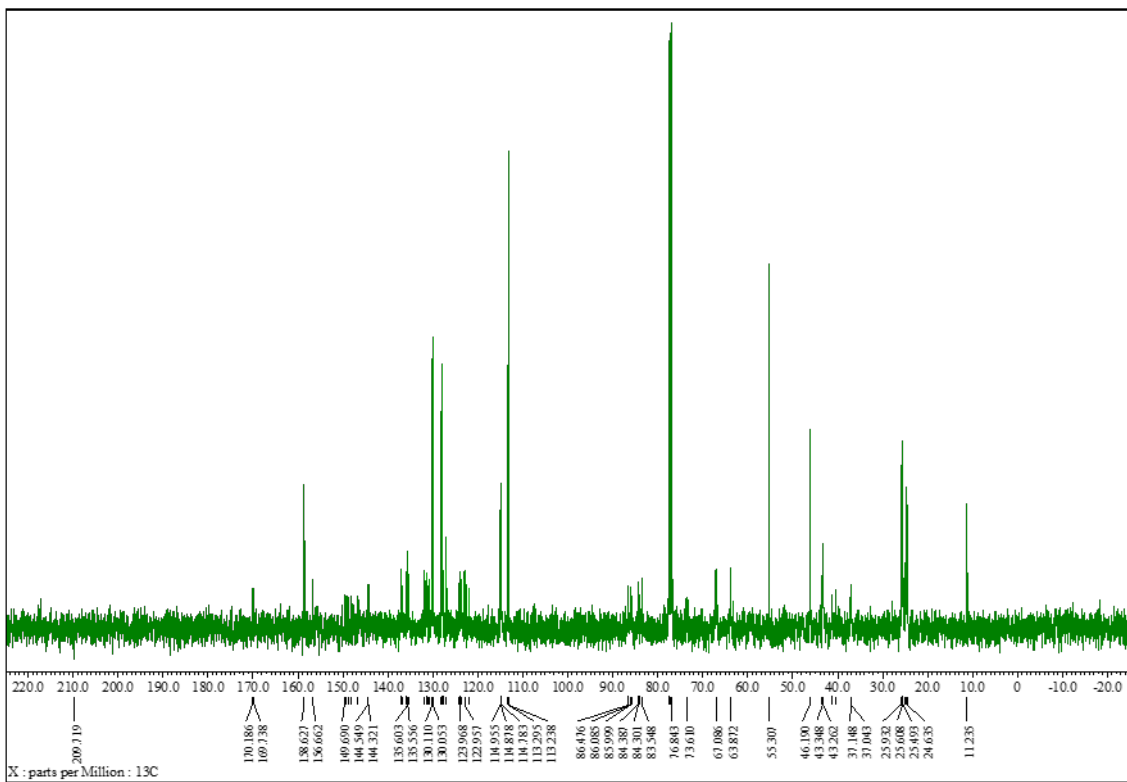

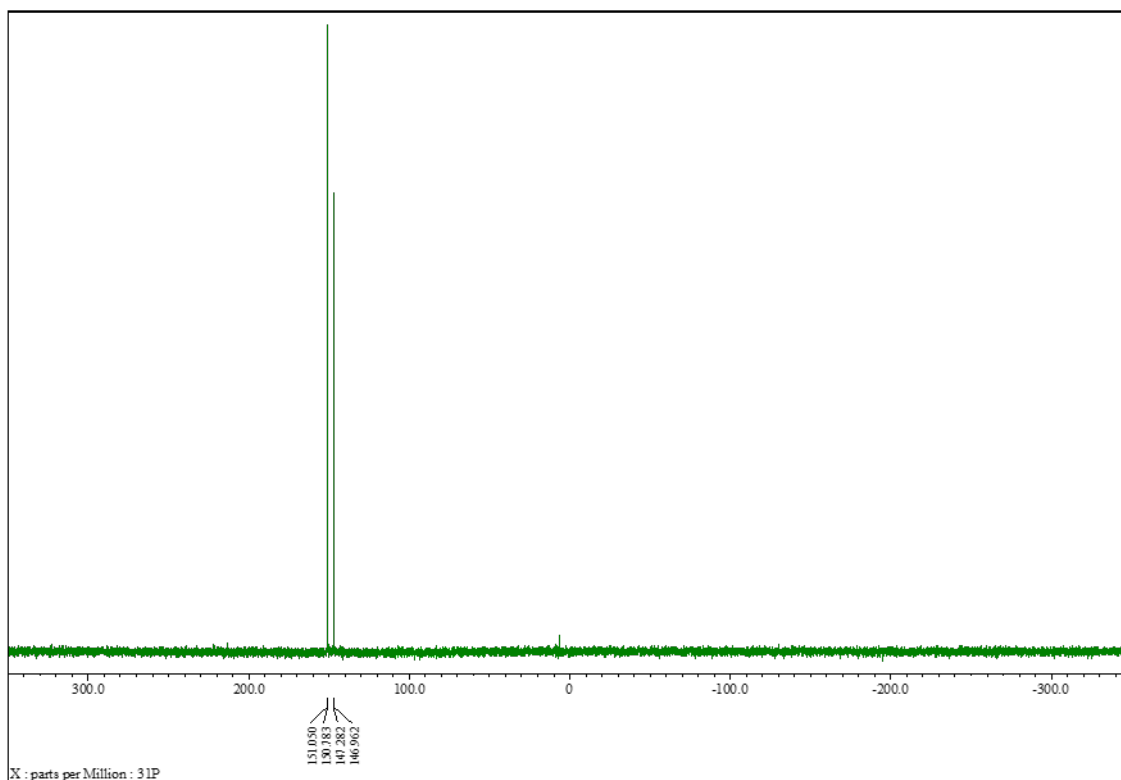

### Compound 7

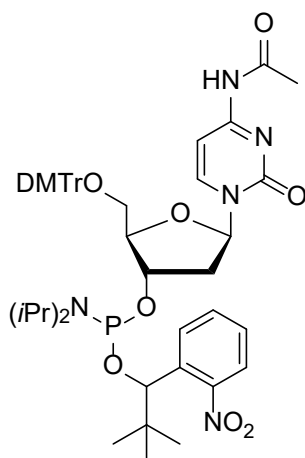

Compound 4 (2.77 g, 6.30 mmol, 2.0 eq.) and 5-(methylthio)-1*H*-tetrazole (0.731 g, 6.30 mmol, 2.0 eq.) were dissolved in DCM (10 mL). To the solution, *N*4-acetyl-2'-deoxy-5'-*O*-(4,4'-dimethoxytrityl)-cytidine (1.80 g, 3.15 mmol, 1.0 eq.) was added at 0 °C, then stirred at room temperature for 6 hours. Afterwards, AcOEt (200 mL) was added to the reaction mixture then washed with saturated NaHCO<sub>3</sub> aqueous solution and brine. The organic layer was dried with Na<sub>2</sub>SO<sub>4</sub>, filtered, and concentrated in vacuo. The crude product was purified by silica gel column chromatography (Hexane/AcOEt = 1/1 with 1% TEA) and Compound 7 (2.12 g, 2.32 mmol, 74 %) was obtained. <sup>1</sup>H-NMR (392 MHz, CDCl<sub>3</sub>)

(diastereomixture):  $\delta$  9.899-9.802 (br, 1H), 8.234-7.991 (m, 1H), 7.770-7.488 (m, 3H), 7.395-7.212 (m, 10H), 7.120-7.044 (m, 1H), 6.846-6.783 (m, 4H), 6.345-6.256, 5.793-5.722 (m, 1H), 5.465-5.338 (m, 1H), 4.744-4.636, 4.419-4.339 (m, 1H), 4.246-4.207, 3.938-3.912, 3.719-3.712 (m, 1H), 3.801-3.779 (m, 6H), 3.675-3.175 (m, 4H), 2.878-2.726, 2.432-2.282 (m, 1H), 2.259-2.241 (m, 3H), 2.215-2.076, 1.760-1.694 (m, 1H), 1.293-0.797 (m, 21H);  $^{13}\text{C}$ -NMR (99 MHz,  $\text{CDCl}_3$ ):  $\delta$  170.873, 162.804, 158.713, 154.840, 149.375, 144.654, 144.330, 135.374, 131.455, 130.920, 130.167, 128.174, 128.031, 127.802, 127.144, 123.882, 123.386, 113.333, 96.404, 87.000, 86.924, 85.856, 77.339, 72.809, 62.709, 55.317, 43.443, 41.287, 37.024, 25.684, 24.959, 24.664;  $^{31}\text{P}$ -NMR (159 MHz,  $\text{CDCl}_3$ ): 153.295, 151.799, 149.955, 147.576; HRMS (ESI) calc.  $m/z$  910.4151 ( $\text{M} + \text{H}^+$ ), found  $m/z$  910.4133 ( $\text{M} + \text{H}^+$ ).

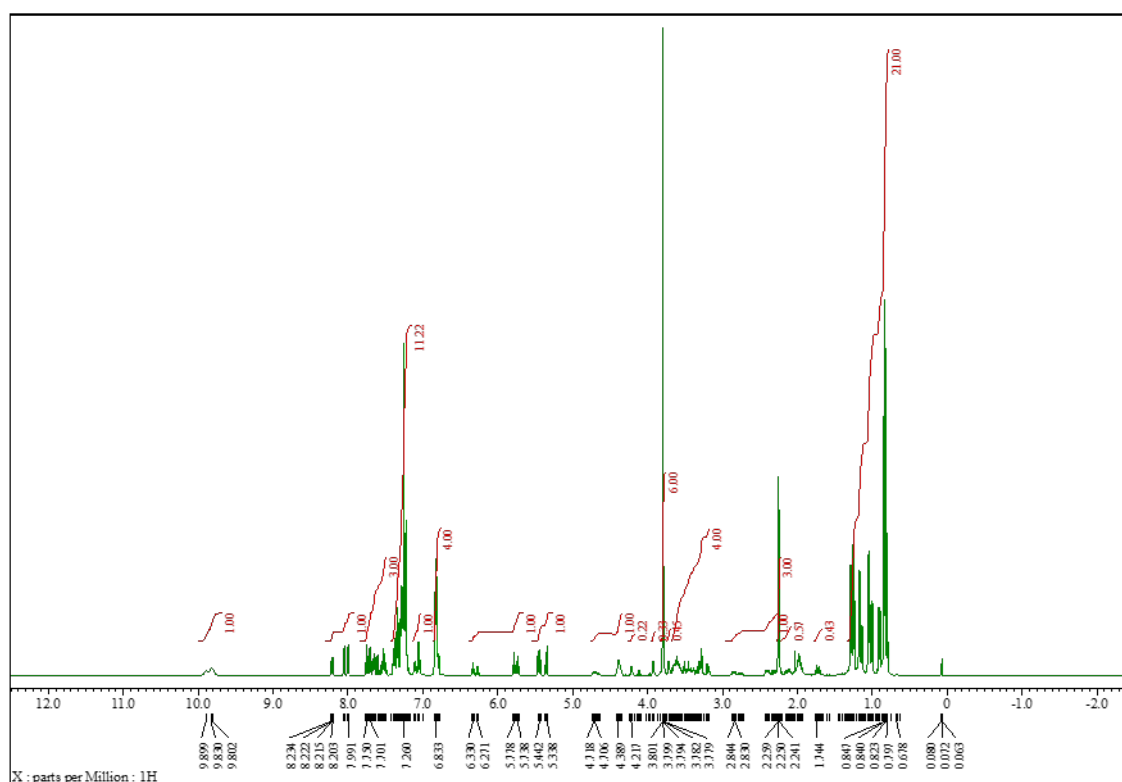



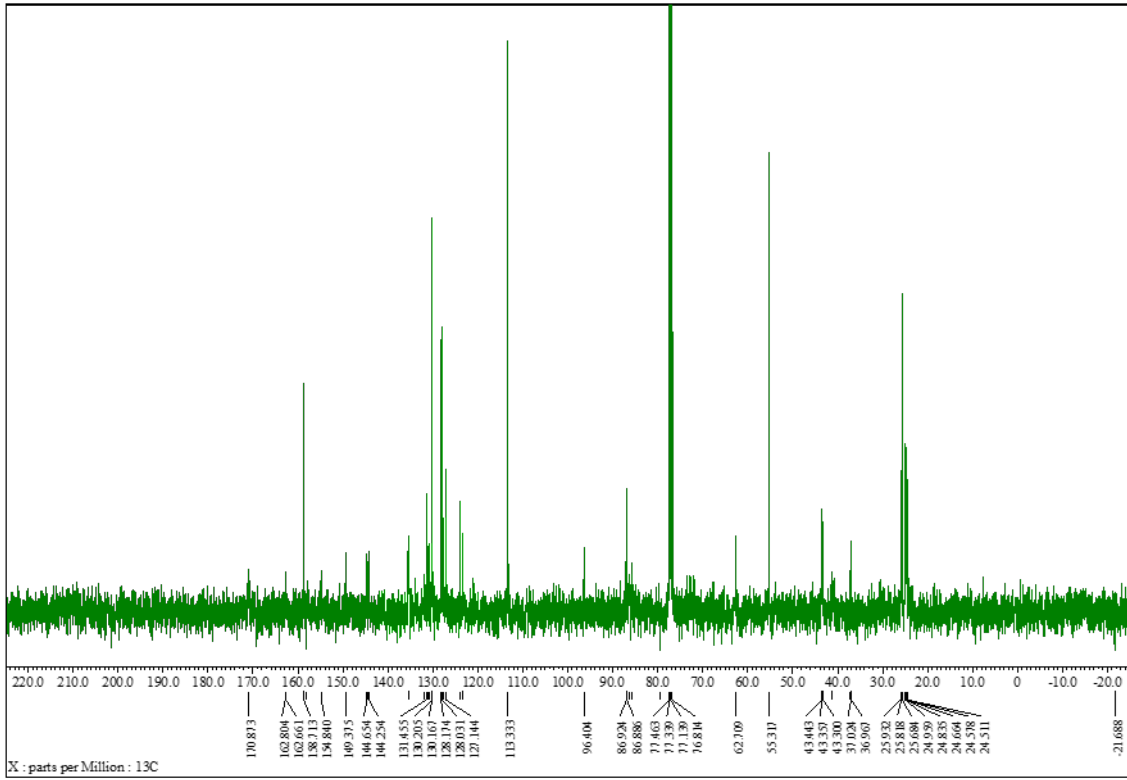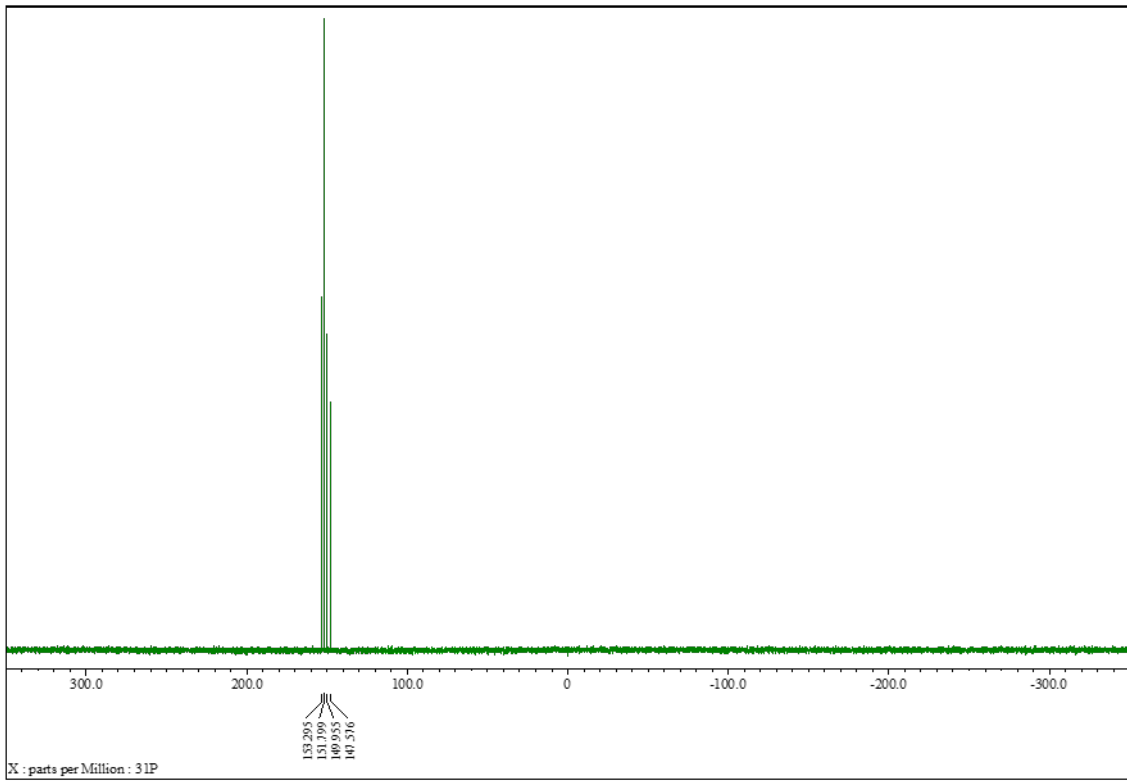

## Compound 8

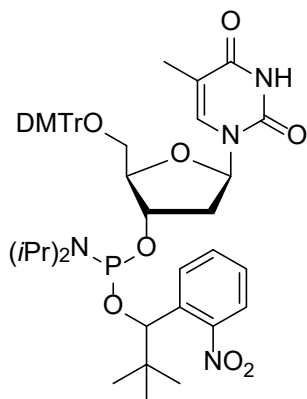

Compound 4 (2.42 g, 5.51 mmol, 2.0 eq.) and 5-(methylthio)-1*H*-tetrazole (0.640 g, 5.51 mmol, 2.0 eq.) were dissolved in DCM (10 mL). To the solution, 2'-deoxy-5'-*O*-(4,4'-dimethoxytrityl)-thymidine (1.50 g, 2.75 mmol, 1.0 eq.) was added at 0 °C, then stirred at room temperature for 7 hours. Afterwards, AcOEt (200 mL) was added to the reaction mixture then washed with saturated NaHCO<sub>3</sub> aqueous solution and brine. The organic layer was dried with Na<sub>2</sub>SO<sub>4</sub>, filtered, and concentrated in vacuo. The crude product was purified by silica gel column chromatography (Hexane/AcOEt = 2/1 → 1/1 with 1% TEA) and Compound 8 (2.00 g, 2.2 mmol, 81 %) was obtained. <sup>1</sup>H-NMR (392 MHz, CDCl<sub>3</sub>) (diastereomixture): δ 8.528 (br, 1H), 7.774-7.192 (m, 14H), 6.812-6.777 (m, 4H), 6.489-6.414, 5.816-5.710 (m, 1H), 5.469-5.281 (m, 1H), 4.775-4.691, 4.441-4.414 (m, 1H), 4.324-3.801 (m, 1H), 3.779-3.763 (m, 6H), 3.724-3.085 (m, 4H), 2.662-1.873 (m, 2H), 1.412-0.773 (m, 24H); <sup>13</sup>C-NMR (99 MHz, CDCl<sub>3</sub>): δ 164.006, 158.770, 150.463, 144.387, 135.832, 135.422, 135.250, 131.817, 131.512, 130.816, 130.138, 128.231, 128.050, 127.191, 123.939, 123.262, 113.324, 111.330, 86.953, 85.541, 84.511, 78.350, 73.705, 63.834, 55.327, 43.386, 40.305, 36.948, 25.646, 24.482, 11.635; <sup>31</sup>P-NMR (159 MHz, CDCl<sub>3</sub>): 152.921, 151.665, 149.474, 147.897; HRMS (ESI) calc. *m/z* 905.3861 (M + Na<sup>+</sup>), found *m/z* 905.3862 (M + Na<sup>+</sup>).

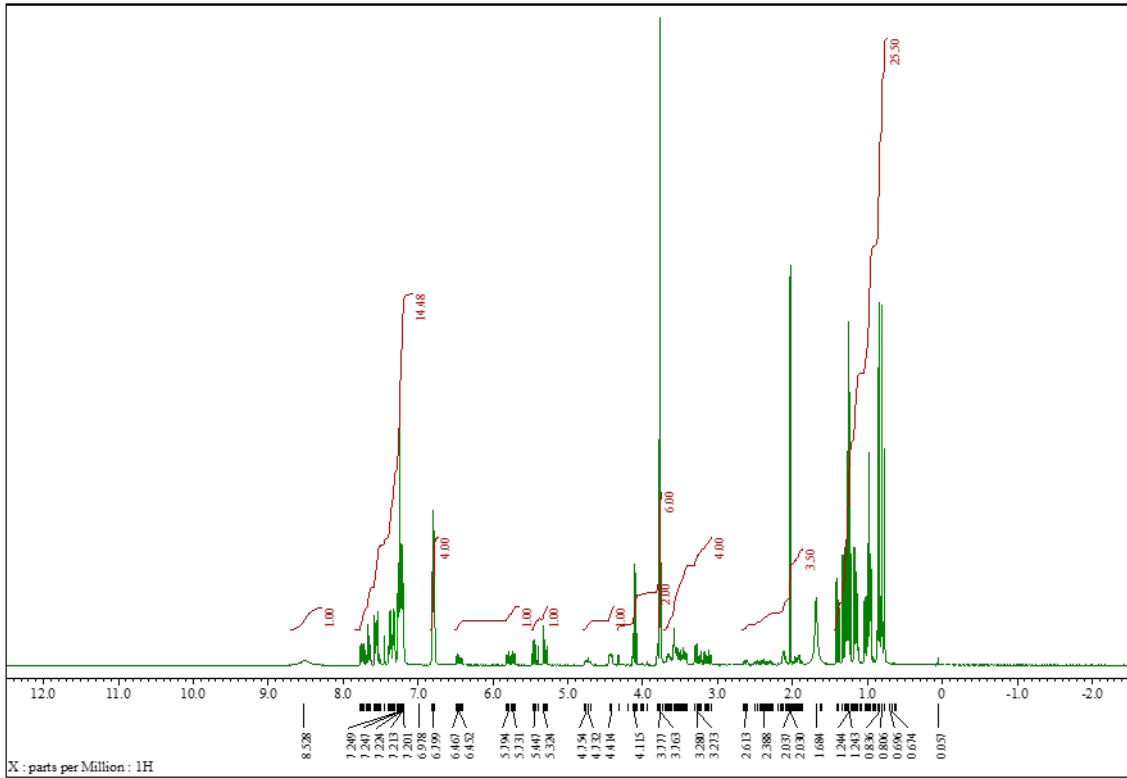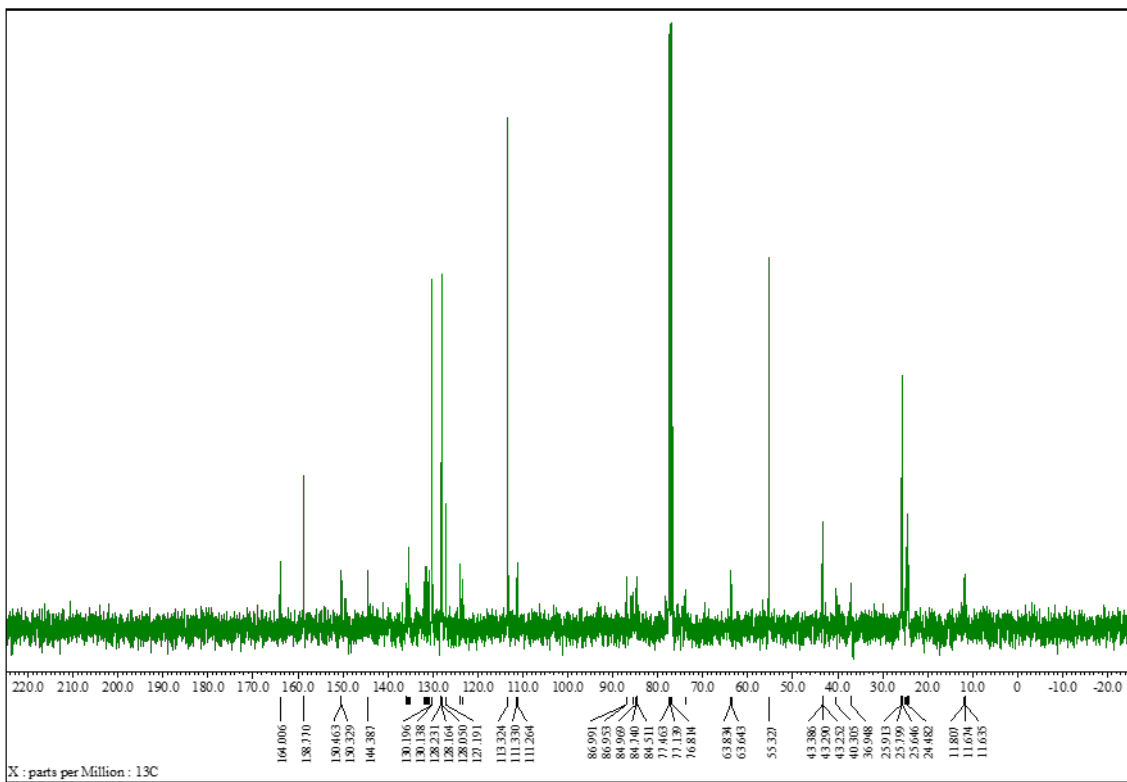

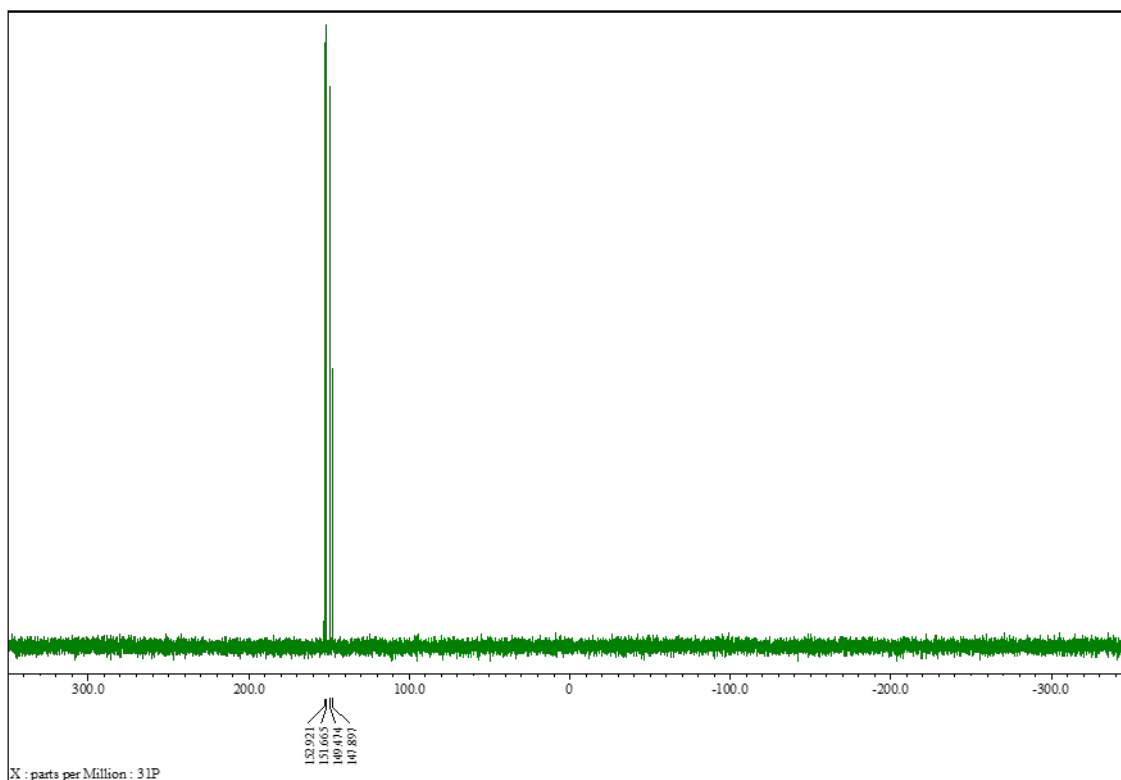

### Compound 9

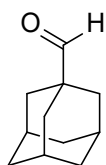

1-adamantanemethanol (1.80 g, 10.8 mmol, 1.0 eq.) was dissolved in DCM (160 mL). Then, PCC (3.50 g, 16.2 mmol, 1.5 eq.) was added and stirred at room temperature for 2 hours. After that, the reaction mixture was loaded directly to a silica gel column (about 10 cm). The sample was eluted by DCM and concentrated in vacuo. Compound **9** (1.60 g, 9.74 mmol, 90%) was obtained.  $^1\text{H-NMR}$  (392 MHz,  $\text{CDCl}_3$ ):  $\delta$  9.321 (s, 1H), 2.066 (m, 3H), 1.793-1.671 (m, 12H);  $^{13}\text{C-NMR}$  (99 MHz,  $\text{CDCl}_3$ ):  $\delta$  206.095, 44.921, 36.643, 35.918, 27.429; HRMS (ESI) calc.  $m/z$  187.1093 ( $\text{M} + \text{Na}^+$ ), found  $m/z$  187.1092 ( $\text{M} + \text{Na}^+$ ).

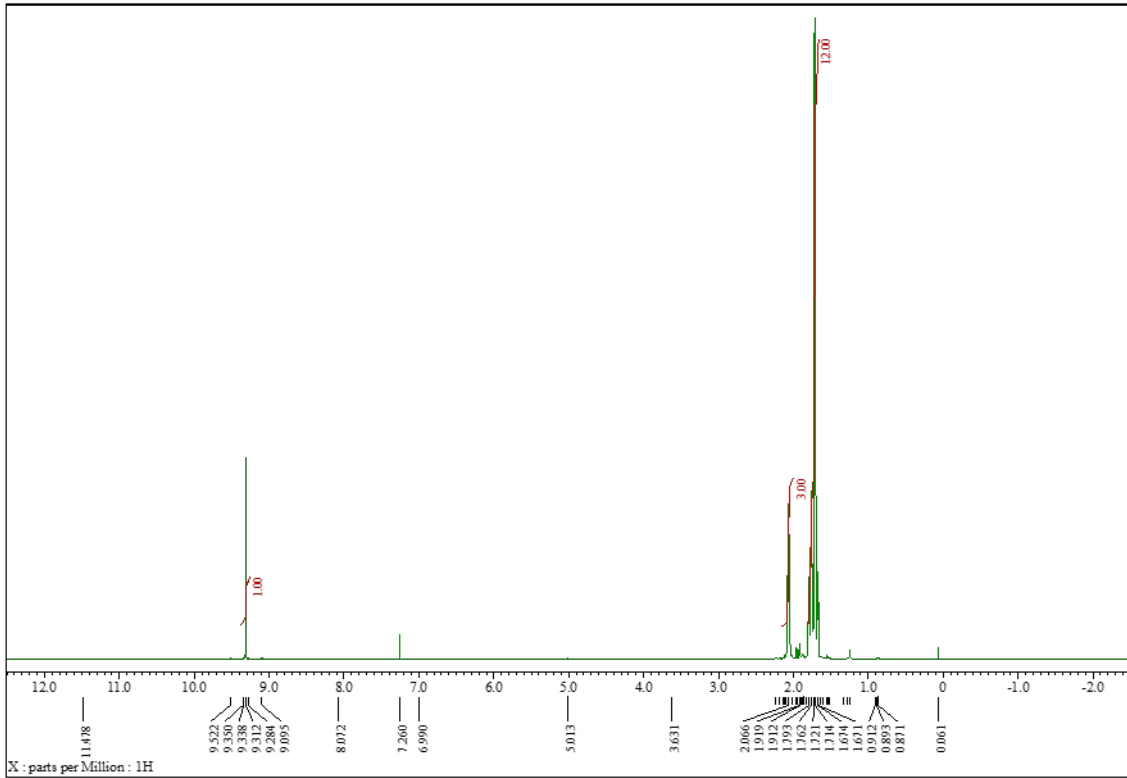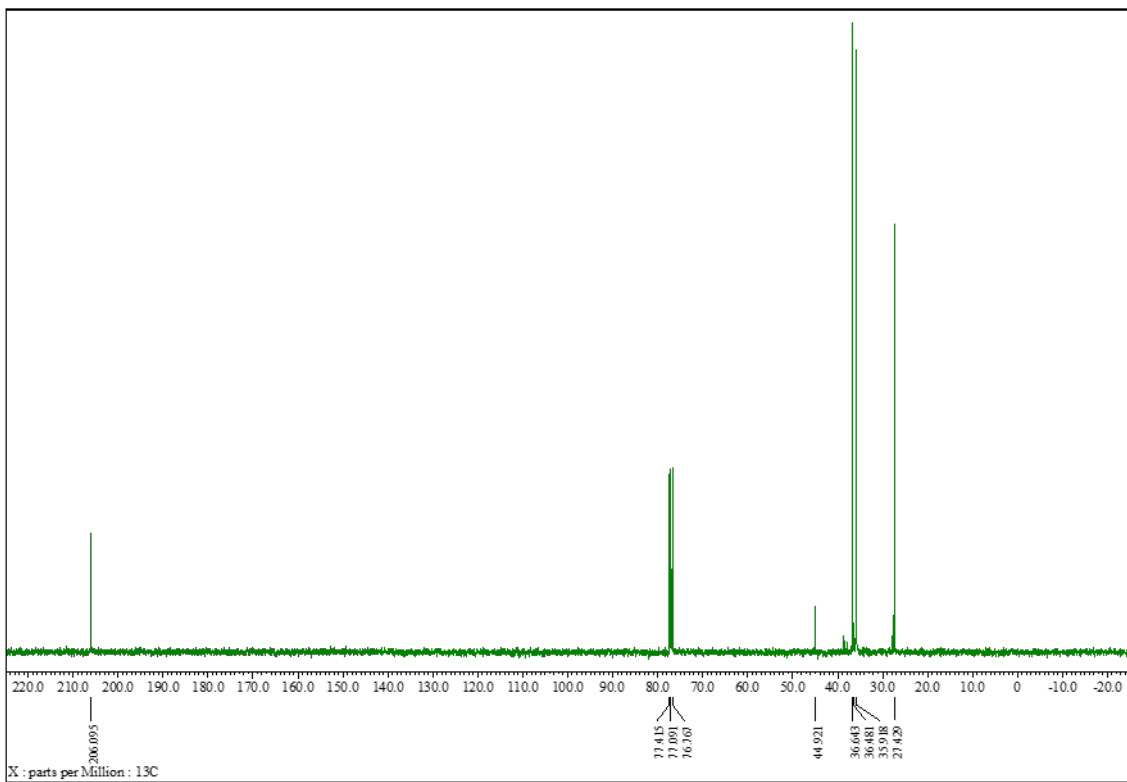

## Compound 10

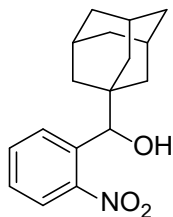

1-iodo-2-nitrobenzene (758 mg, 3.00 mmol, 1.0 eq.) was dissolved in THF (28 mL) and stirred at -40 °C. To the solvent, 2 M phenylmagnesium chloride in THF solution (1.65 mL, 3.30 mmol, 1.1 eq.) was added dropwise and stirred at -40 °C for 30 min. Then Compound 9 (500 mg, 3.00 mmol, 1.0 eq.) in THF (2 mL) was added. After stirring for 2 hours, the reaction was quenched by adding saturated NH<sub>4</sub>Cl aqueous solution. The temperature of reaction mixture was gradually increased to room temperature and diluted with water. After extraction by AcOEt, the organic layer was washed with brine, dried by Na<sub>2</sub>SO<sub>4</sub>, and concentrated in vacuo. After purification by silica gel column chromatography (Hexane/DCM = 1/2), Compound 10 (300 mg, 1.04 mmol, 35%) was obtained. <sup>1</sup>H-NMR (392 MHz, CDCl<sub>3</sub>): δ 7.753-7.713 (m, 2H), 7.605-7.563 (m, 1H), 7.418-7.375 (m, 1H), 5.210 (d, *J* = 3.6 Hz, 1H), 2.013 (d, *J* = 4.0 Hz, 1H), 1.941 (m, 3H), 1.659-1.401 (m, 12H); <sup>13</sup>C-NMR (99 MHz, CDCl<sub>3</sub>): δ 135.203, 131.722, 130.138, 127.945, 123.710, 75.126, 38.350, 37.558, 36.891, 28.250 ; HRMS (ESI) calc. *m/z* 310.1414 (M + Na<sup>+</sup>), found *m/z* 310.1407 (M + Na<sup>+</sup>).

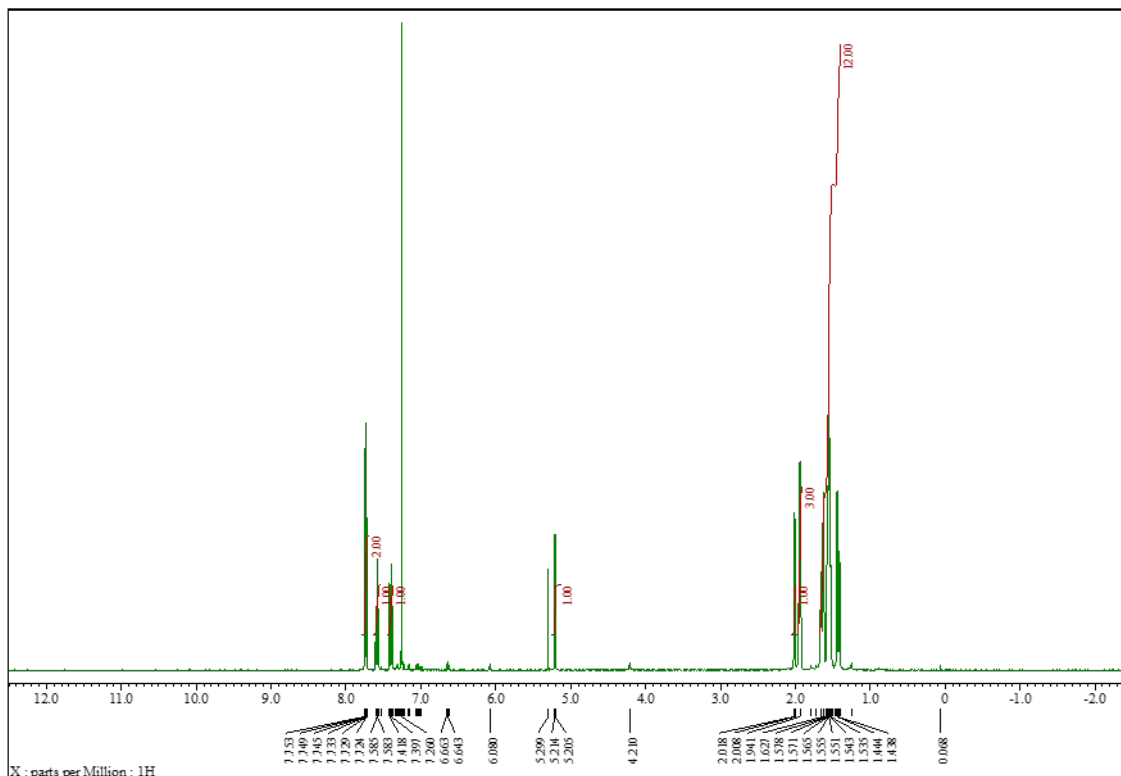

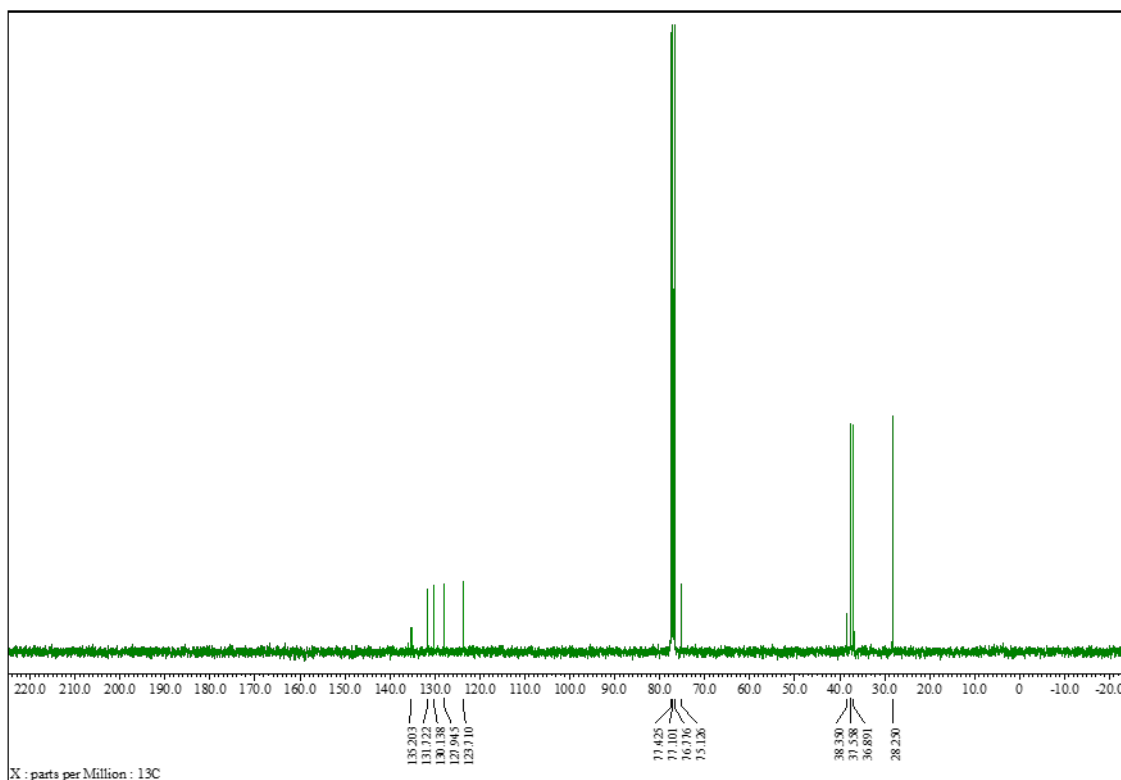

### Compound 11

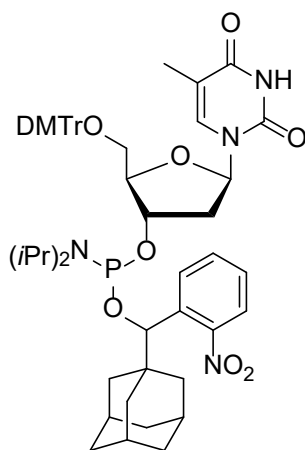

2'-deoxy-5'-*O*-(4,4'-dimethoxytrityl)-thymidine (258 mg, 0.47 mmol, 1.0 eq.) was dissolved in DCM (3 mL) and stirred at room temperature. To the solution, DIPEA (107  $\mu$ L, 0.61 mmol, 1.3 eq.) and bis(diisopropylamino)chlorophosphine (163 mg, 0.61 mmol, 1.3 eq.) were added and stirred at room temperature for 2 hours. Then, Compound **10** (115 mg, 0.55 mmol, 1.0 eq.) and *1H*-tetrazole (58.0 mg, 0.83 mmol, 1.5 eq.) were added to the reaction mixture and stirred at room temperature for 1.5 hours. After that, water was added to the reaction mixture and extracted by AcOEt. The organic layer was washed with saturated NaHCO<sub>3</sub> aqueous solution and brine, dried by Na<sub>2</sub>SO<sub>4</sub>, and concentrated. The

crude compound was purified by column silica gel column chromatography (DCM/AcOEt = 15/1 → 2/1) and Compound **11** (135 mg, 0.153 mmol, 28%) was obtained. <sup>1</sup>H-NMR (392 MHz, CDCl<sub>3</sub>) (diastereomixture): δ 8.262 (br, 1H), 7.788-7.146 (m, 15H), 6.836-6.776 (m, 4H), 6.491-5.159 (m, 2H), 4.928-4.409 (m, 1H), 4.328-3.804 (m, 1H), 3.789-3.765 (m, 6H), 3.727-3.022 (m, 4H), 2.818-1.992 (m, 2H), 1.630-0.923 (m, 30H); <sup>13</sup>C-NMR (99 MHz, CDCl<sub>3</sub>): δ 168.584, 158.760, 150.014, 149.089, 144.359, 135.889, 135.250, 131.579, 131.245, 130.186, 130.138, 128.231, 128.164, 128.050, 127.191, 123.853, 113.324, 111.159, 86.981, 85.570, 84.540, 77.310, 76.051, 63.624, 55.327, 43.376, 38.560, 37.692, 36.919, 36.738, 28.259, 24.912, 11.740; <sup>31</sup>P-NMR (159 MHz, CDCl<sub>3</sub>): 153.108, 151.906, 150.169, 148.084; HRMS (ESI) calc. m/z 983.4331 (M + Na<sup>+</sup>), found m/z 983.4336 (M + Na<sup>+</sup>).

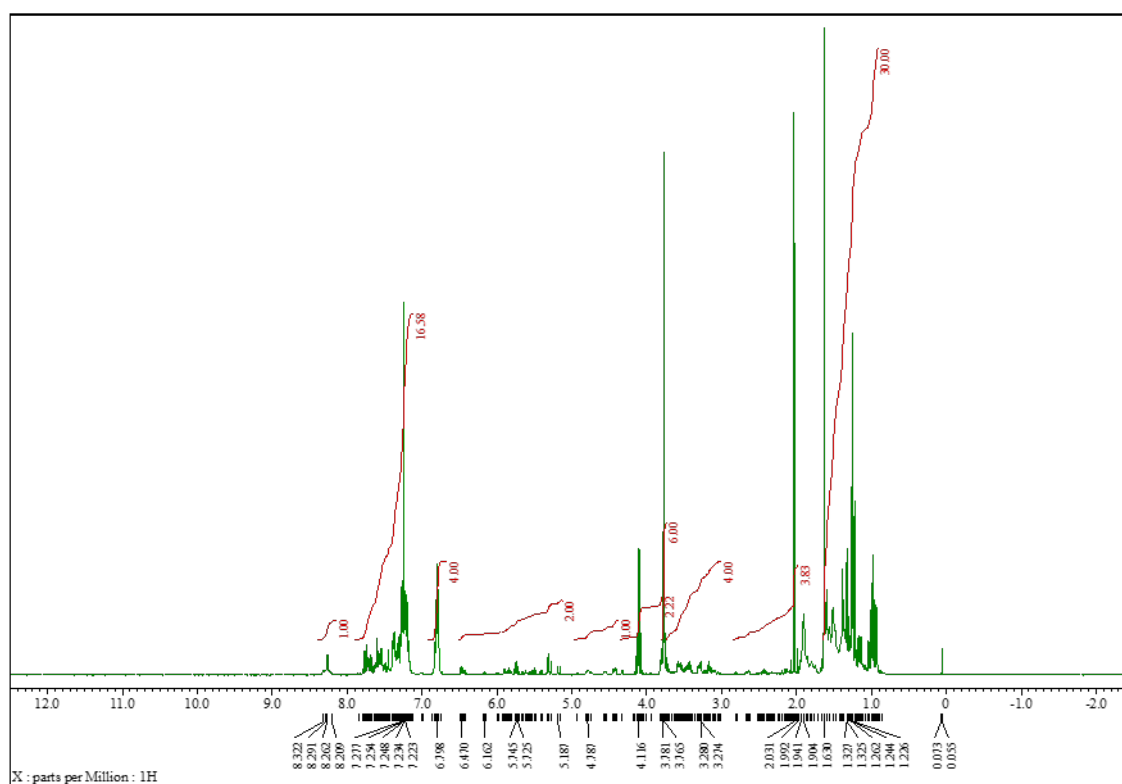



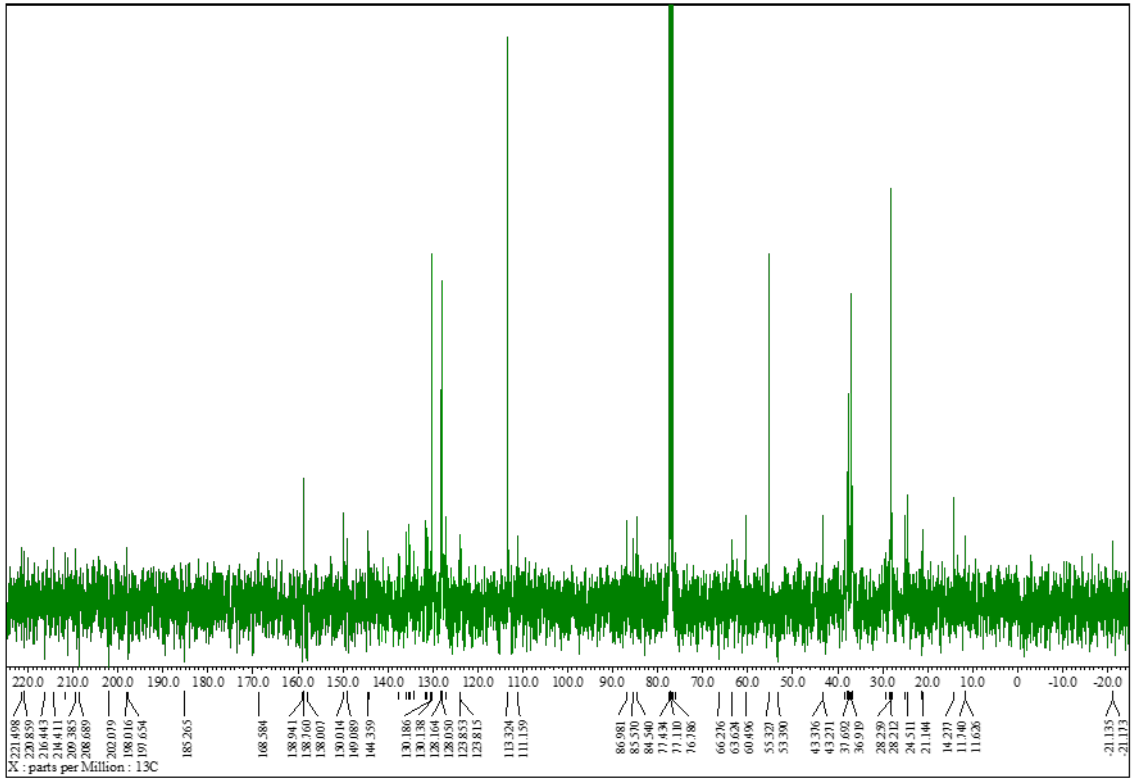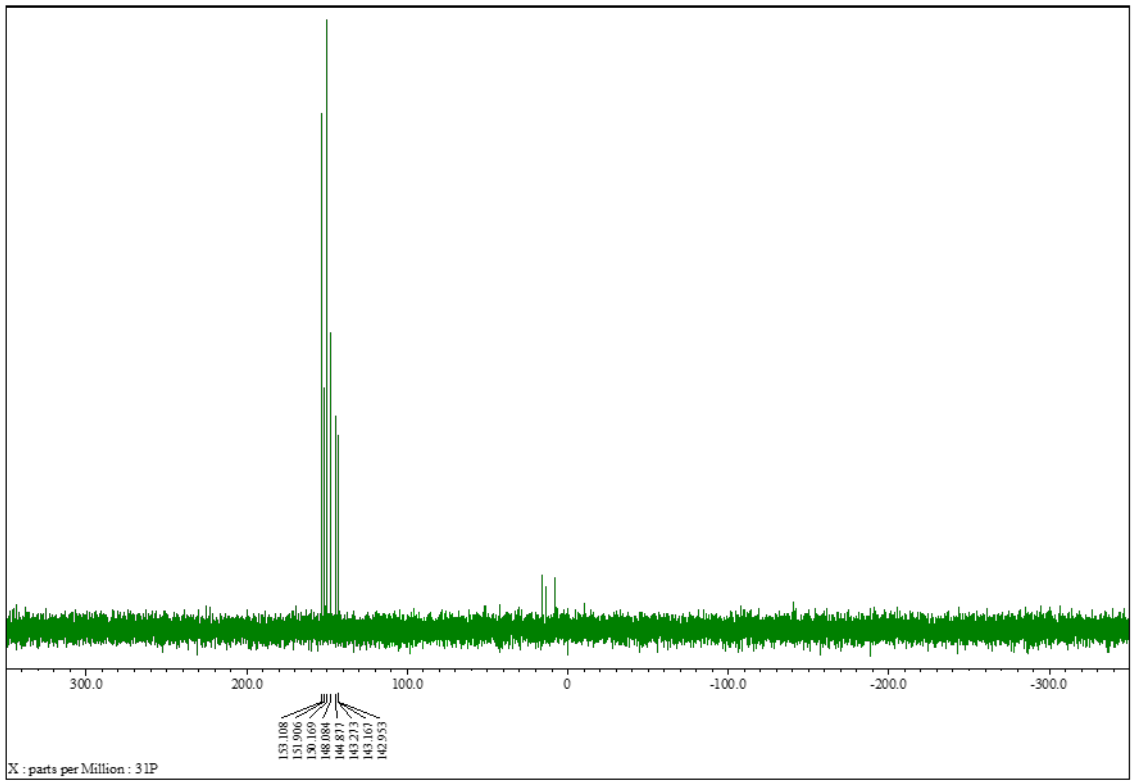

## Compound 12

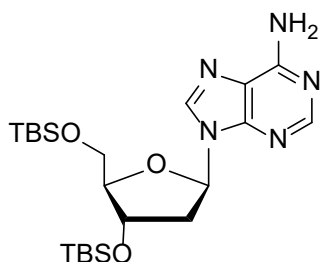

2'-deoxyadenosine (1.00 g, 3.98 mmol, 1.0 eq.) was dissolved in DMF (40 mL). Imidazole (1.63 g, 23.9 mmol, 6.0 eq.) and *tert*-butyldimethylchlorosilane (1.80 g, 11.9 mmol, 3.0 eq.) were added and stirred at room temperature. After stirring for 16 h, the reaction mixture was concentrated, diluted with AcOEt then washed with saturated NaHCO<sub>3</sub> aqueous solution and brine. The organic layer was dried with Na<sub>2</sub>SO<sub>4</sub>, filtered, and concentrated in vacuo. The crude product was purified by silica gel column chromatography (Hexane/AcOEt = 89/11→61:39→6:94) and Compound **12** (1.80 g, 3.76 mmol, 94%) was obtained. <sup>1</sup>H-NMR (392 MHz, CDCl<sub>3</sub>): δ 8.337 (s, 1H), 8.144 (s, 1H), 6.448 (t, *J* = 6.6 Hz, 1H), 5.801 (br, 2H), 4.621-4.588 (m, 1H), 4.007 (q, *J* = 3.6 Hz, 1H), 3.871 (dd, *J* = 11.4, 4.2 Hz, 1H), 3.768 (dd, *J* = 11.6, 3.2 Hz, 1H), 0.909 (s, 9H), 0.904 (s, 9H), 0.093 (s, 6H), 0.084 (s, 6H); <sup>13</sup>C-NMR (99 MHz, CDCl<sub>3</sub>): δ 155.451, 153.038, 149.623, 139.085, 119.991, 87.935, 84.387, 71.855, 62.794, 41.430, 26.037, 25.837, 18.512, 18.092, -4.731, -5.303; HRMS (ESI) calc. *m/z* 480.2821 (M + H<sup>+</sup>), found *m/z* 480.2837 (M + H<sup>+</sup>).

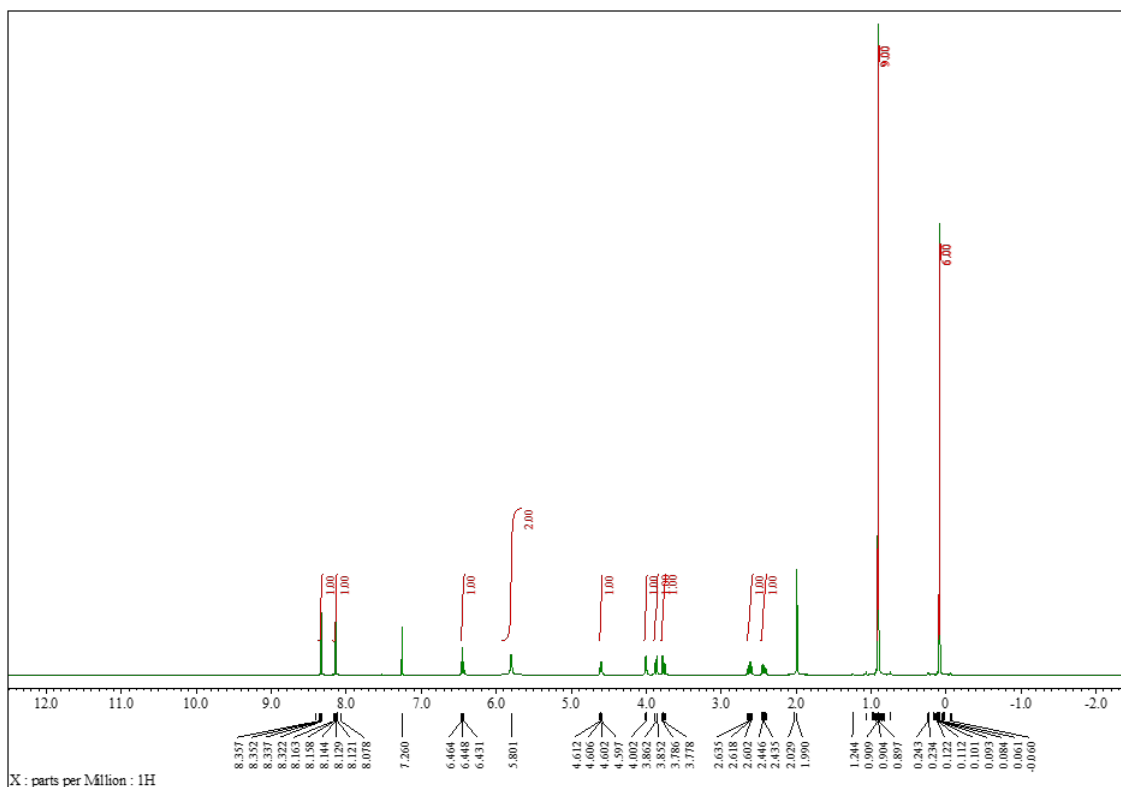

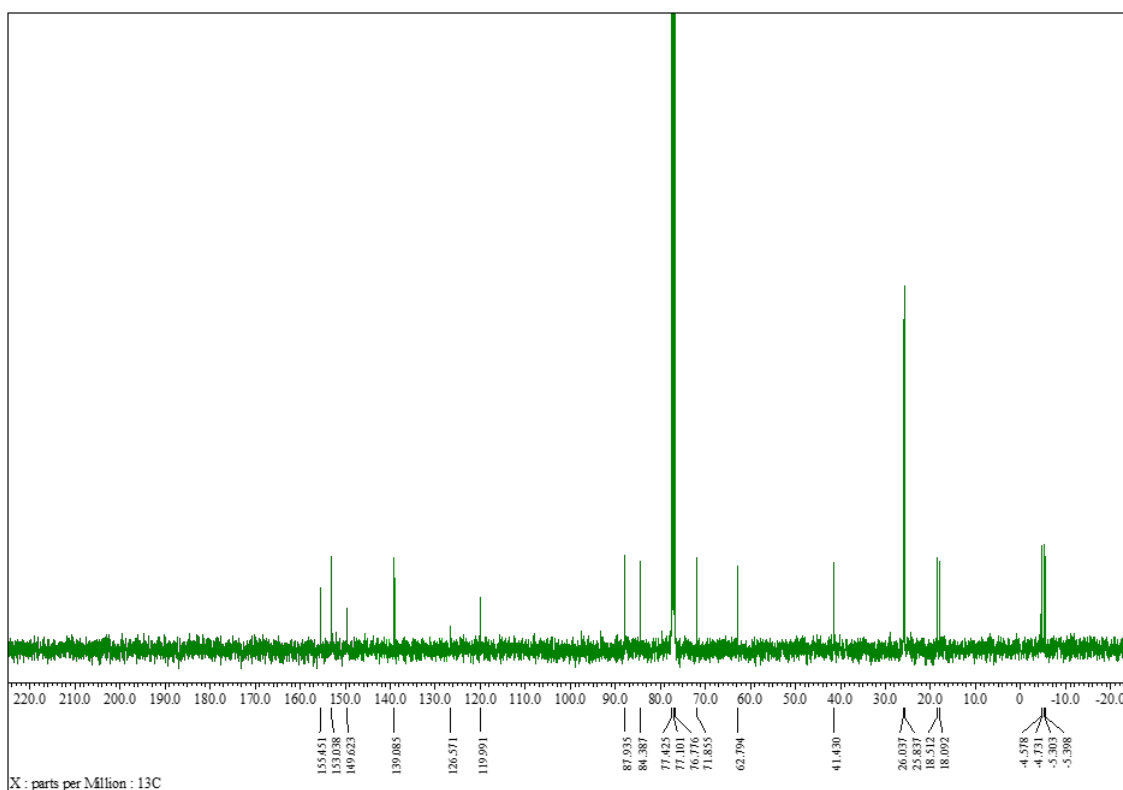

### Compound 13

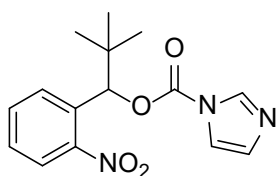

Compound **3** (1.00 g, 4.78 mmol, 1 eq.) was dissolved in dichloromethane (24 mL). 1,1-carbonyldiimidazole (1.94 g, 11.9 mmol, 2.5 eq.) was added and stirred at room temperature. After stirring for 20 h, the reaction mixture was diluted with dichloromethane and washed with saturated NaHCO<sub>3</sub> aqueous solution and brine. The organic layer was dried with Na<sub>2</sub>SO<sub>4</sub>, filtered, and concentrated in vacuo. The crude product was purified by silica gel column chromatography (Hexane/AcOEt = 85/15→57/43→35/65) and Compound **13** (1.41 g, 4.65 mmol, 97%) was obtained. <sup>1</sup>H-NMR (392 MHz, CDCl<sub>3</sub>): δ 8.181 (s, 1H), 7.956 (dd, *J* = 8.4, 1.2 Hz, 1H), 7.638-7.554 (m, 2H), 7.516-7.473 (m, 1H), 7.449 (t, 1.4 Hz, 1H), 7.095 (q, *J* = 0.8 Hz, 1H), 6.693 (s, 1H), 1.040 (s, 9H); <sup>13</sup>C-NMR (99 MHz, CDCl<sub>3</sub>): δ 149.281, 147.844, 136.980, 132.803, 131.787, 131.040, 129.354, 128.521, 125.053, 117.130, 80.485, 36.559, 25.915; HRMS (ESI) calc. *m/z* 304.1292 (M + H<sup>+</sup>), found *m/z* 304.1293 (M + H<sup>+</sup>).

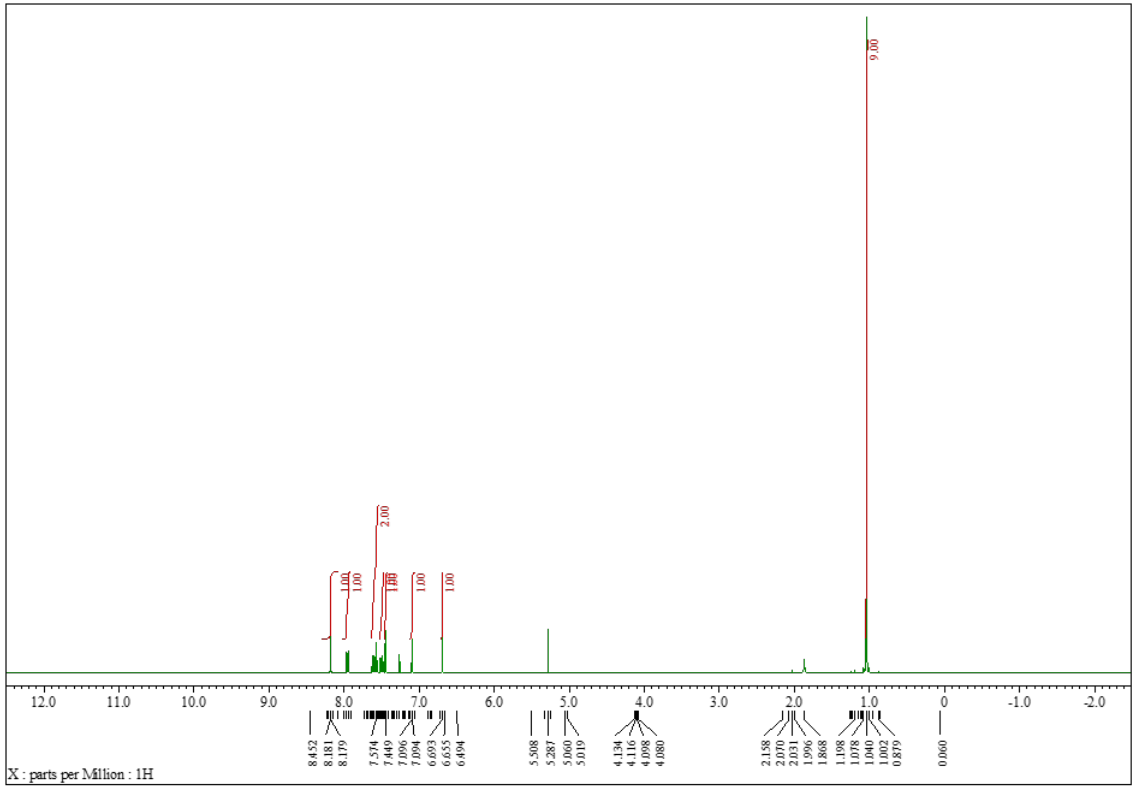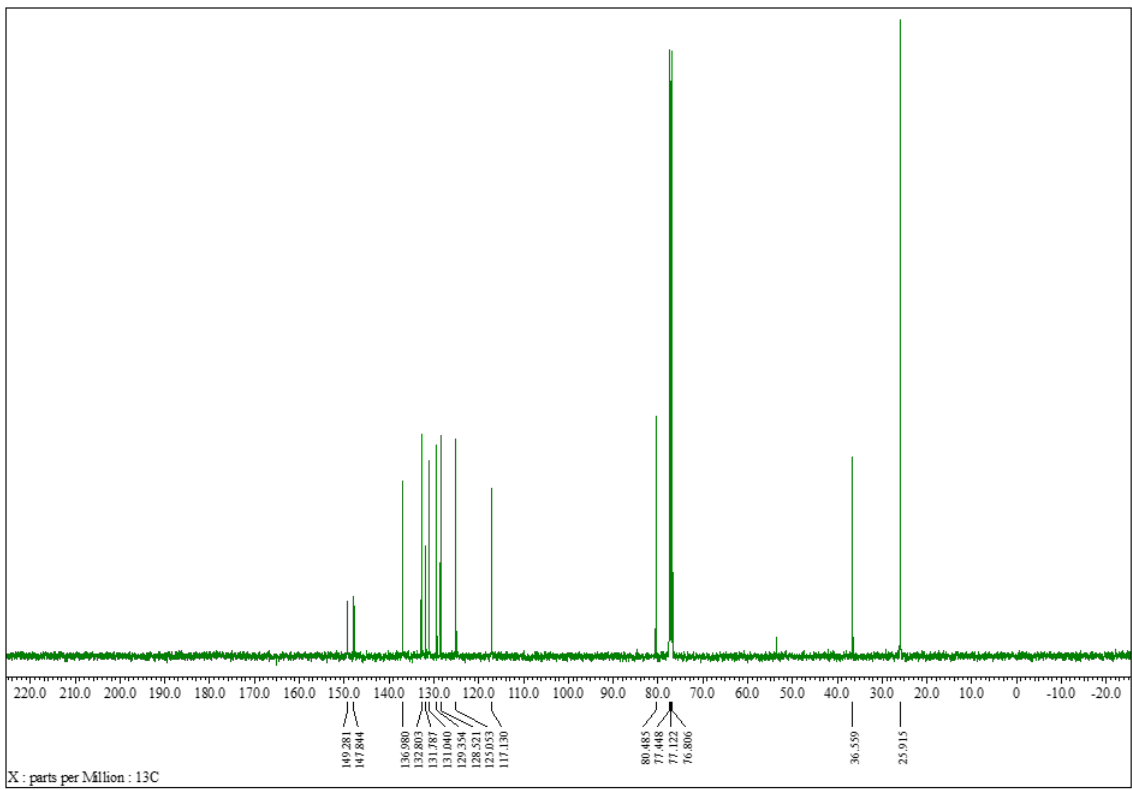

## Compound 15

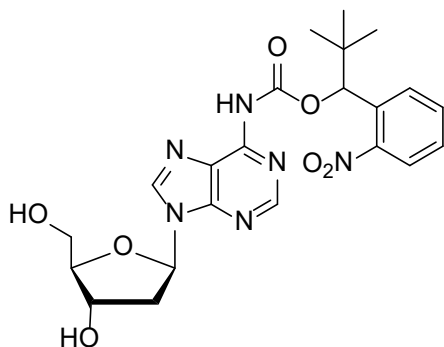

Compound **13** (854 mg, 2.81 mmol, 1.5 eq.) was dissolved in dichloromethane (18 mL). Triethyloxonium tetrafluoroborate (535 mg, 2.81 mmol, 1.5 eq.) was added and stirred at room temperature. After stirring for 2 h, Compound **12** (900 mg, 1.88 mmol, 1 eq.) was added then stirred at room temperature. After stirring for 21 h, the reaction mixture was diluted with AcOEt then washed with saturated NaHCO<sub>3</sub> aqueous solution and brine. The organic layer was dried with Na<sub>2</sub>SO<sub>4</sub>, filtered, and concentrated in vacuo. The crude product was dissolved in THF (18 mL) and added triethylamine trihydrofluoride (1.53 mL, 9.39 mmol, 5.0 eq.). After stirring for 16 h at room temperature, the reaction mixture was concentrated and purified by silica gel column chromatography (DCM/MeOH = 100/0→98/2→95/5) and Compound **15** (765 mg, 1.57 mmol, 84%) was obtained. <sup>1</sup>H-NMR (392 MHz, DMSO-*d*<sub>6</sub>): δ 10.906 (s, 1H), 8.671 (s, 1H), 8.600 (s, 1H), 7.974 (d, *J* = 8.4 Hz, 1H), 7.841-7.762 (m, 2H), 7.615-7.572 (m, 1H), 6.441 (t, *J* = 6.8 Hz, 1H), 6.251 (s, 1H), 5.341 (d, *J* = 4.0 Hz, 1H), 5.002 (t, *J* = 5.8 Hz, 1H), 4.452-4.411 (m, 1H), 3.887 (dd, *J* = 7.6, 4.4 Hz, 1H), 3.649-3.593 (m, 1H), 3.552-3.495 (m, 1H), 2.785-2.717 (m, 1H), 2.363-2.304 (m, 1H), 0.926 (s, 9H); <sup>13</sup>C-NMR (99 MHz, DMSO-*d*<sub>6</sub>): δ 152.103, 151.817, 151.655, 149.976, 149.442, 143.195, 133.457, 133.066, 129.766, 129.652, 124.883, 123.710, 88.526, 84.292, 76.776, 71.187, 62.117, 36.414, 25.999; HRMS (ESI) calc. *m/z* 487.1936 (M + H<sup>+</sup>), found *m/z* 487.1938 (M + H<sup>+</sup>).

※ 1 peak was same position of DMSO's peak (around 40 ppm), so 1 carbon peak was missing.

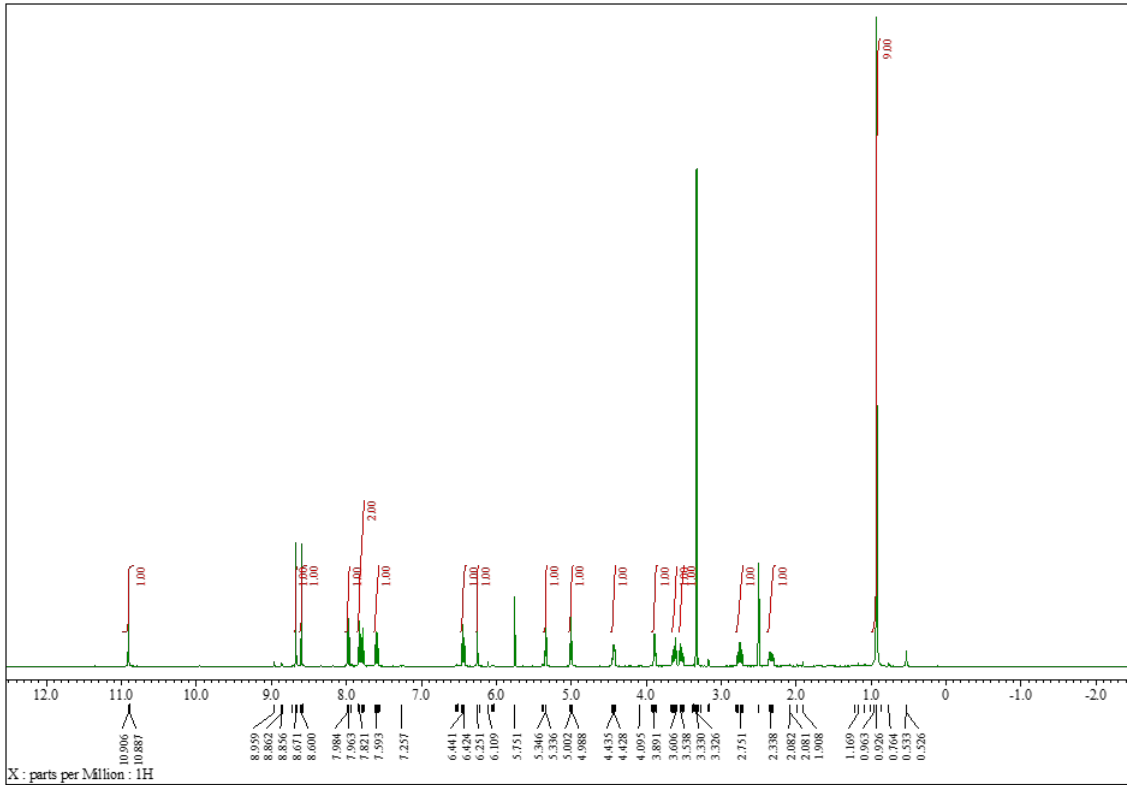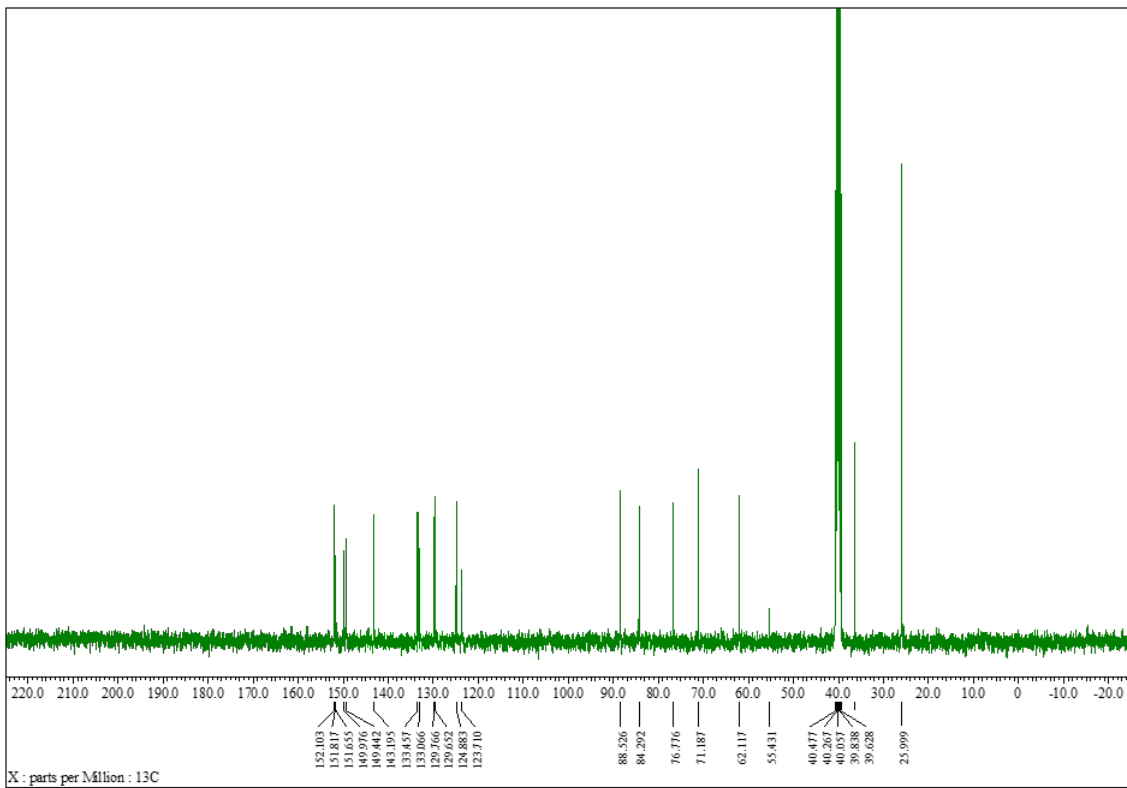

## Compound 16

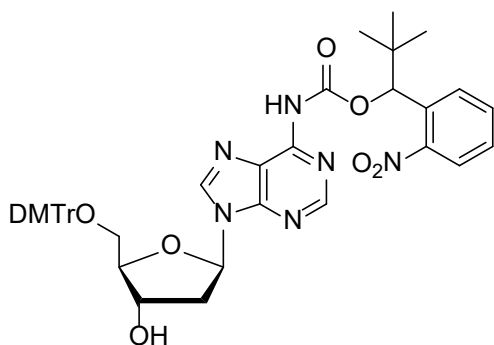

Compound **15** (260 mg, 0.534 mmol, 1.0 eq.) was dissolved in pyridine (1.3 mL). 4-dimethylaminopyridine (1.31 mg, 0.0107 mmol, 0.020 eq.) and 4,4'-dimethoxytrityl chloride (199 mg, 0.588 mmol, 1.1 eq.) were added and stirred at room temperature. After stirring for 19 h, the reaction mixture was diluted with AcOEt then washed with saturated NaHCO<sub>3</sub> aqueous solution and brine. The organic layer was dried with Na<sub>2</sub>SO<sub>4</sub>, filtered, and concentrated in vacuo. The crude product was purified by silica gel column chromatography (AcOEt/MeOH = 100/0→98/2) and Compound **16** (339 mg, 0.430 mmol, 81%) was obtained. <sup>1</sup>H-NMR (392 MHz, CDCl<sub>3</sub>): δ 8.635 (s, 1H), 8.511 (d, *J* = 4.0 Hz, 1H), 8.130 (d, *J* = 2.4 Hz, 1H), 7.922 (d, *J* = 8.4 Hz, 1H), 7.675-7.641 (m, 1H), 7.578-7.535 (m, 1H), 7.432-7.407 (m, 1H), 7.388-7.360 (m, 2H), 7.305-7.175 (m, 7H), 6.824-6.774 (m, 4H), 6.632 (2s, 1H), 6.466 (t, *J* = 6.6 Hz, 1H), 4.724-4.689 (m, 1H), 4.152 (q, *J* = 4.4 Hz, 1H), 3.768 (2s, 6H), 3.413 (d, *J* = 4.0 Hz, 2H), 2.899-2.822 (m, 1H), 2.599-2.539 (m, 1H), 1.004 (s, 9H); <sup>13</sup>C-NMR (99 MHz, CDCl<sub>3</sub>): δ 158.684, 152.838, 150.692, 150.129, 149.251, 144.473, 141.259, 135.622, 133.476, 132.485, 130.072, 129.156, 128.584, 128.164, 128.002, 127.096, 124.807, 123.853, 122.232, 113.286, 86.781, 86.314, 84.769, 78.045, 72.513, 63.634, 55.317, 40.381, 36.309, 25.961; HRMS (ESI) calc. *m/z* 789.3243 (M + H<sup>+</sup>), found *m/z* 789.3251 (M + H<sup>+</sup>).

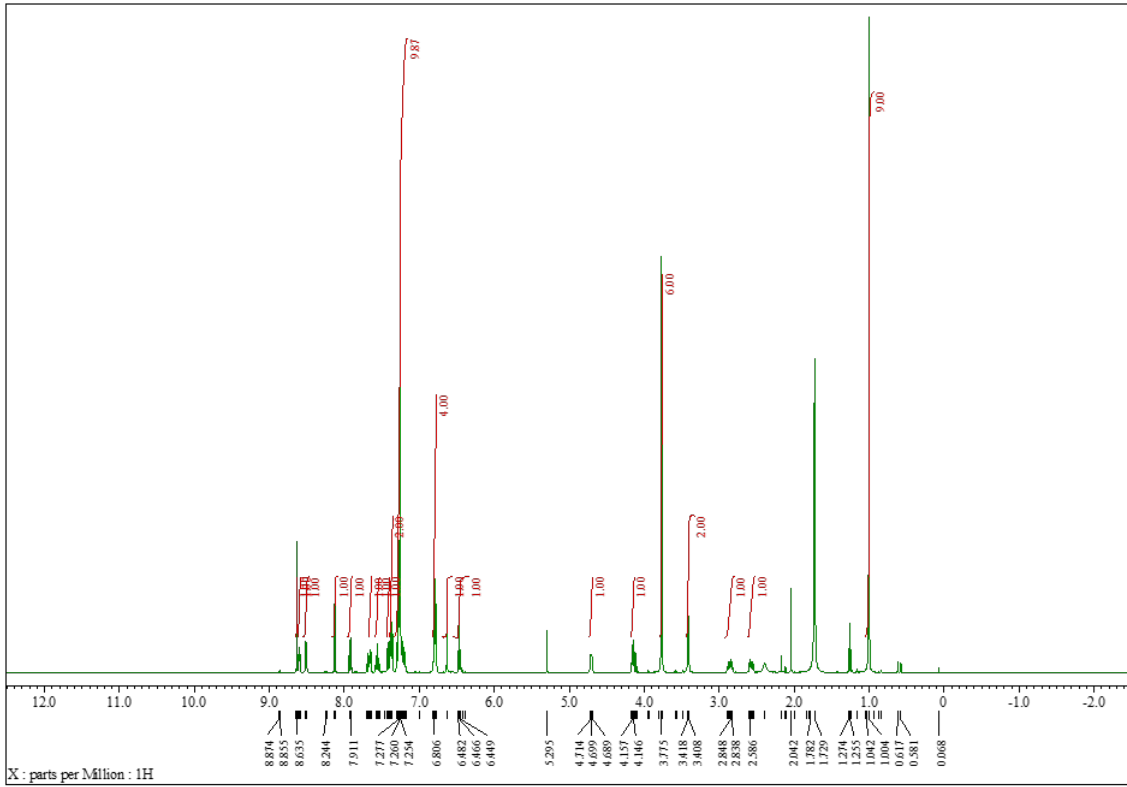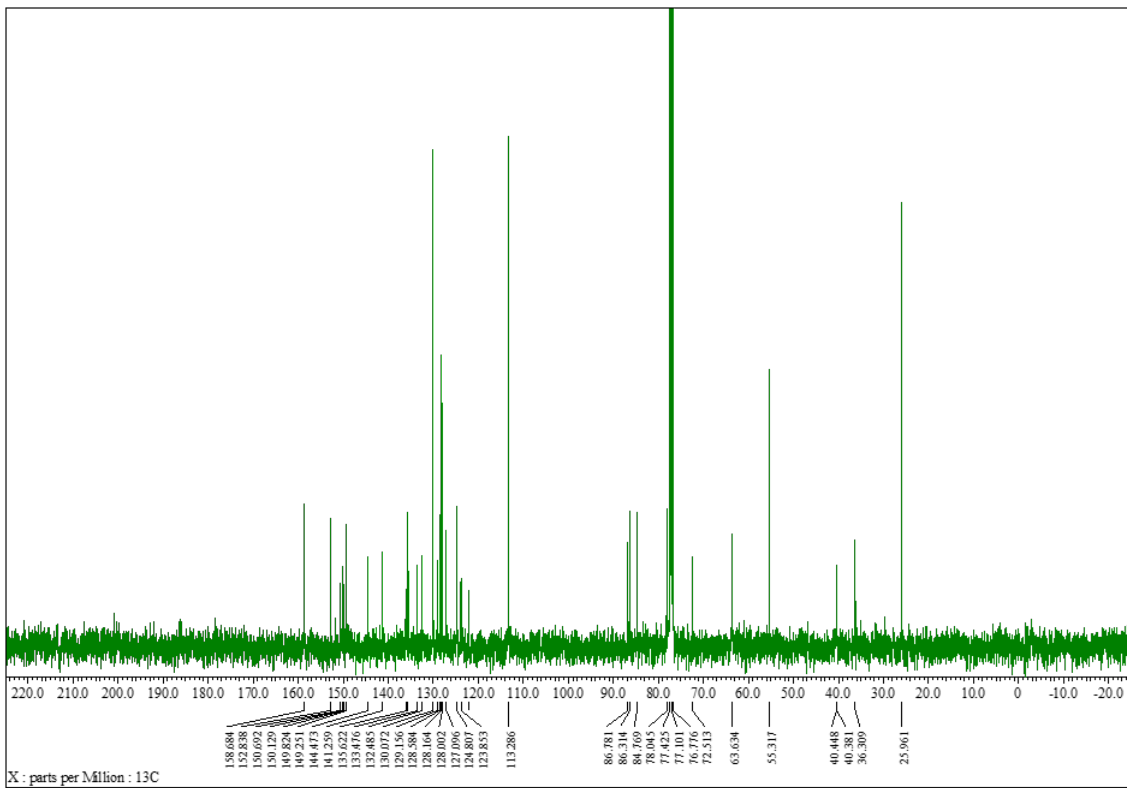



## Compound 17

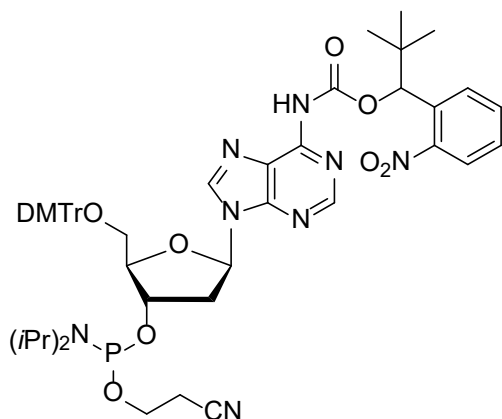

Compound **16** (300 mg, 0.380 mmol, 1.0 eq.) was dissolved in DCM (1.0 mL). 2-cyanoethyl *N,N*-diisopropylchlorophosphoramidite (117 mg, 0.494 mmol, 1.3 eq.) and DIPEA (165  $\mu$ L, 0.947 mmol, 2.5 eq.) were added and stirred at room temperature. After stirring overnight, the reaction mixture was diluted with DCM and washed with saturated  $\text{NaHCO}_3$  aqueous solution and brine. The organic layer was dried with  $\text{Na}_2\text{SO}_4$ , filtered, and concentrated in vacuo. The crude product was dissolved in small amount of AcOEt then Hexane was added to the solution. The precipitation was filtered and collected, and Compound **16** (310 mg, 0.313 mmol, 82%) was obtained.  $^1\text{H-NMR}$  (392 MHz,  $\text{CDCl}_3$ ) (diastereomixture):  $\delta$  8.647 (s, 1H), 8.413 (br, 1H), 8.194-8.163 (m, 1H), 7.928 (d,  $J = 8.0$  Hz, 1H), 7.661-7.525 (m, 2H), 7.435-7.171 (m, 10 H), 6.798-6.756 (m, 4H), 6.636-6.632 (m, 1H), 6.495-6.454 (m, 1H), 4.808-4.774 (m, 1H), 4.321-4.282 (m, 1H), 3.895-3.558 (m, 10H), 3.489-3.309 (m, 2H), 2.945-2.880 (m, 1H), 2.773-2.695 (m, 1H), 2.616 (t,  $J = 6.4$  Hz, 1H), 2.465 (t,  $J = 6.4$  Hz, 1H), 1.195-1.105 (m, 12H), 1.000 (s, 9H);  $^{13}\text{C-NMR}$  (99 MHz,  $\text{CDCl}_3$ ):  $\delta$  158.617, 152.847, 150.825, 150.062, 149.213, 144.502, 141.412, 135.651, 135.505, 132.513, 130.110, 129.127, 128.584, 128.240, 128.193, 127.935, 127.039, 124.826, 122.251, 117.654, 113.209, 86.609, 86.123, 84.826, 78.016, 73.543, 63.386, 58.283, 55.317, 43.395, 39.714, 36.280, 25.961, 24.654, 20.486;  $^{31}\text{P-NMR}$  (159 MHz,  $\text{CDCl}_3$ ):  $\delta$  149.474, 149.367; HRMS (ESI) calc.  $m/z$  989.4321 ( $\text{M} + \text{H}^+$ ), found  $m/z$  989.4312 ( $\text{M} + \text{Na}^+$ ).

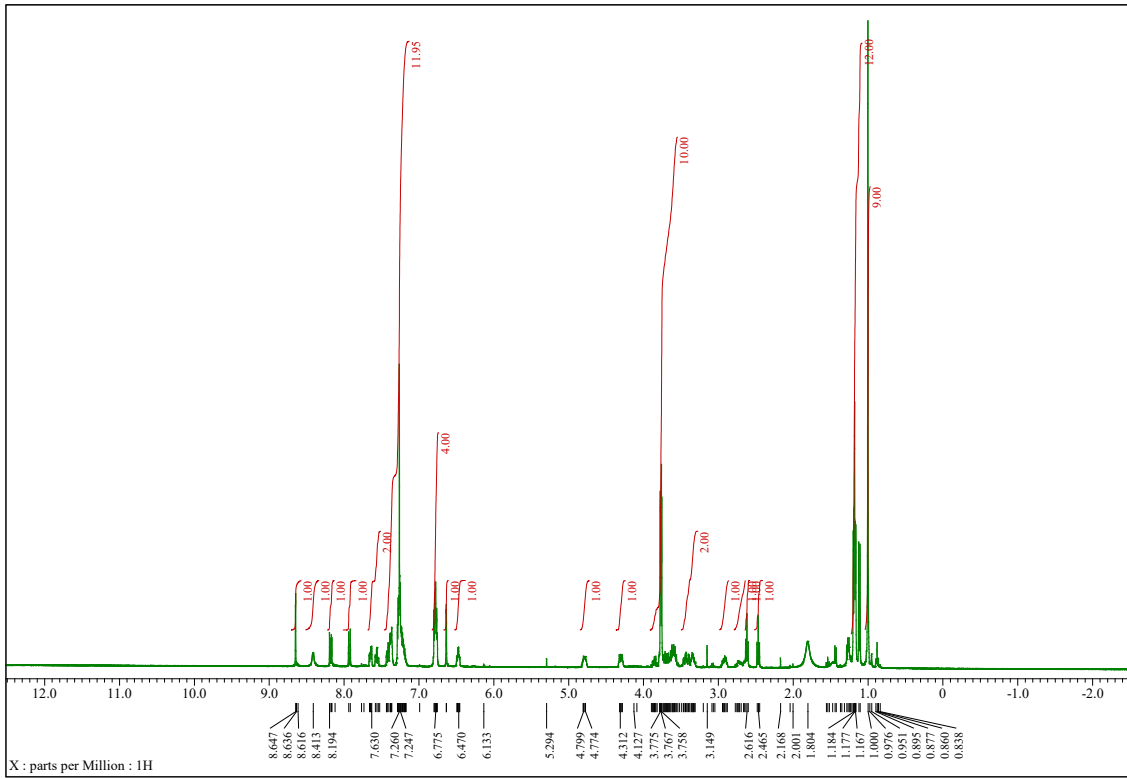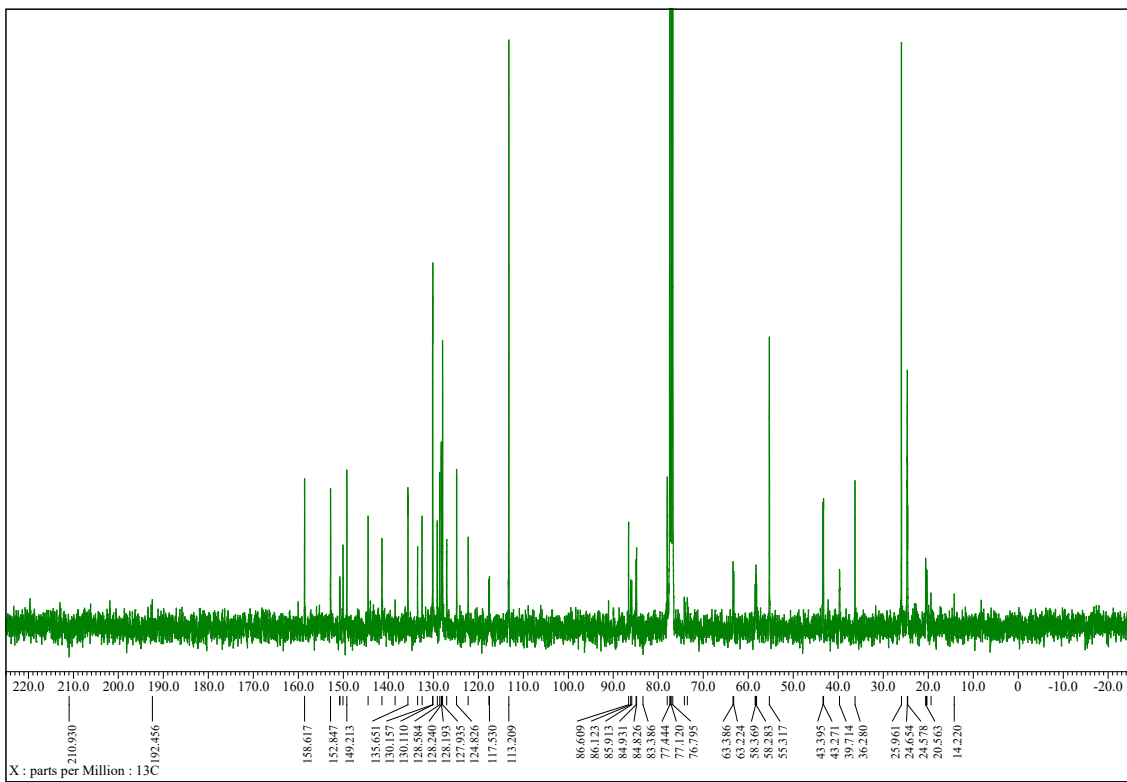

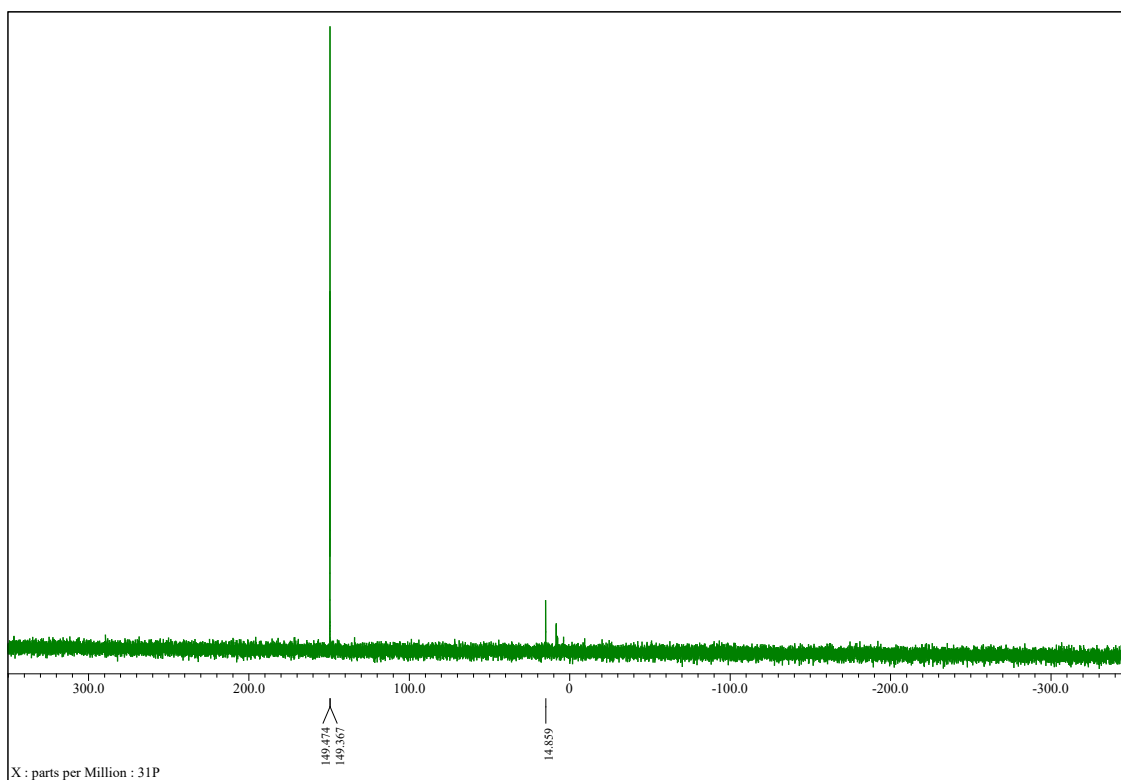

### Compound 18

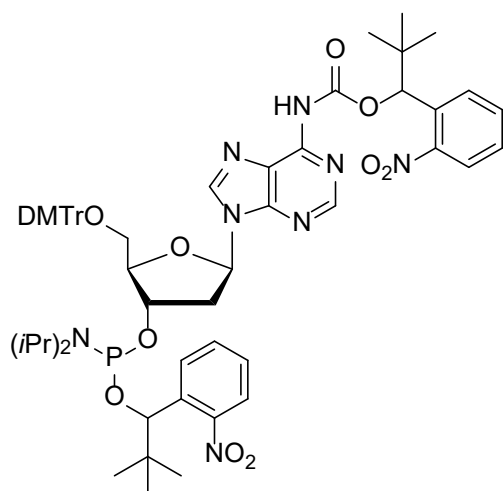

Compound **16** (300 mg, 0.380 mmol, 1.0 eq.) was co-evaporated with benzene and dissolved in DCM (0.9 mL). Compound **4** (251 mg, 0.571 mmol, 1.5 eq.) and 5-(methylthio)-1*H*-tetrazole (133 mg, 1.15 mmol, 3.0 eq.) were added at 0 °C and stirred at room temperature. After stirring for 14 h, the reaction mixture was diluted with AcOEt then washed with saturated NaHCO<sub>3</sub> aqueous solution and brine. The organic layer was dried with Na<sub>2</sub>SO<sub>4</sub>, filtered, and concentrated in vacuo. The crude product was purified by silica gel column chromatography (Hexane/AcOEt = 87/13→75/25→0/100 with 1% TEA)

and Compound **18** (147 mg, 0.130 mmol, 34%) was obtained.  $^1\text{H-NMR}$  (392 MHz,  $\text{DMSO-}d_6$ ) (diastereomixture):  $\delta$  10.922-10.895 (m, 1H), 8.622-8.425 (m, 2H), 7.987-7.966 (m, 1H), 7.884-7.447 (m, 7H), 7.305-7.097 (m, 9H), 6.806-6.677 (m, 4H), 6.537-6.310, 6.096-5.924 (m, 1H), 6.255 (s, 1H), 5.543-5.196 (m, 1H), 5.135-4.505 (m, 1H), 4.151-3.762 (m, 1H), 3.704-3.659 (m, 6H), 3.640-3.421 (m, 2H), 3.230-2.641 (m, 3H), 2.557-2.527, 2.367-2.160, 2.029-1.955 (m, 1H), 1.229-0.760 (m 30H);  $^{13}\text{C-NMR}$  (99 MHz,  $\text{DMSO-}d_6$ ):  $\delta$  158.531, 151.989, 151.559, 150.033, 149.528, 145.265, 143.739, 135.909, 133.429, 133.066, 132.780, 130.930, 130.463, 130.072, 129.766, 129.652, 129.471 128.956, 128.212, 128.097, 127.134, 124.883, 124.349, 123.834, 123.710, 113.543, 86.066, 85.207, 84.349, 76.757, 75.288, 72.923, 63.872, 55.479, 49.747, 43.214, 36.881, 36.404, 25.980, 25.846, 24.740;  $^{31}\text{P-NMR}$  (159 MHz,  $\text{DMSO-}d_6$ ):  $\delta$  151.879, 150.516, 148.405, 147.416, 141.162, 140.948, 140.601, 140.066; HRMS (ESI) calc.  $m/z$  1127.5002 ( $\text{M} + \text{H}^+$ ), found  $m/z$  1127.5007 ( $\text{M} + \text{H}^+$ ).

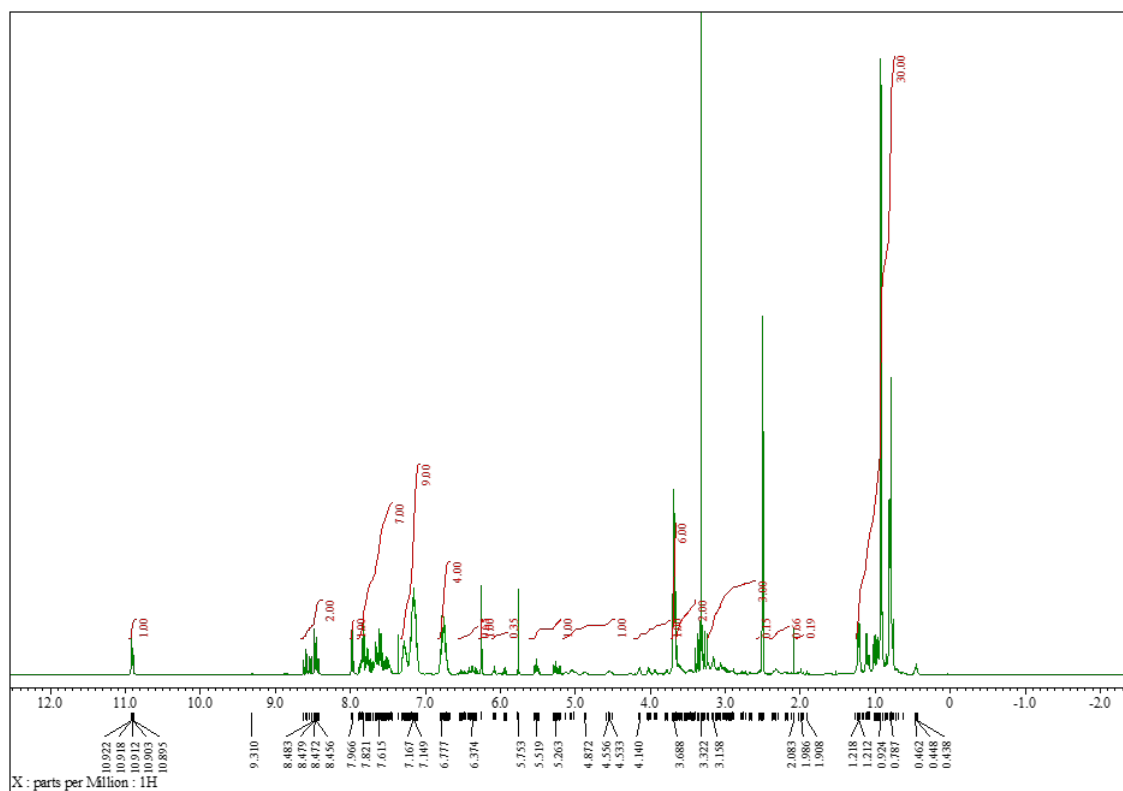

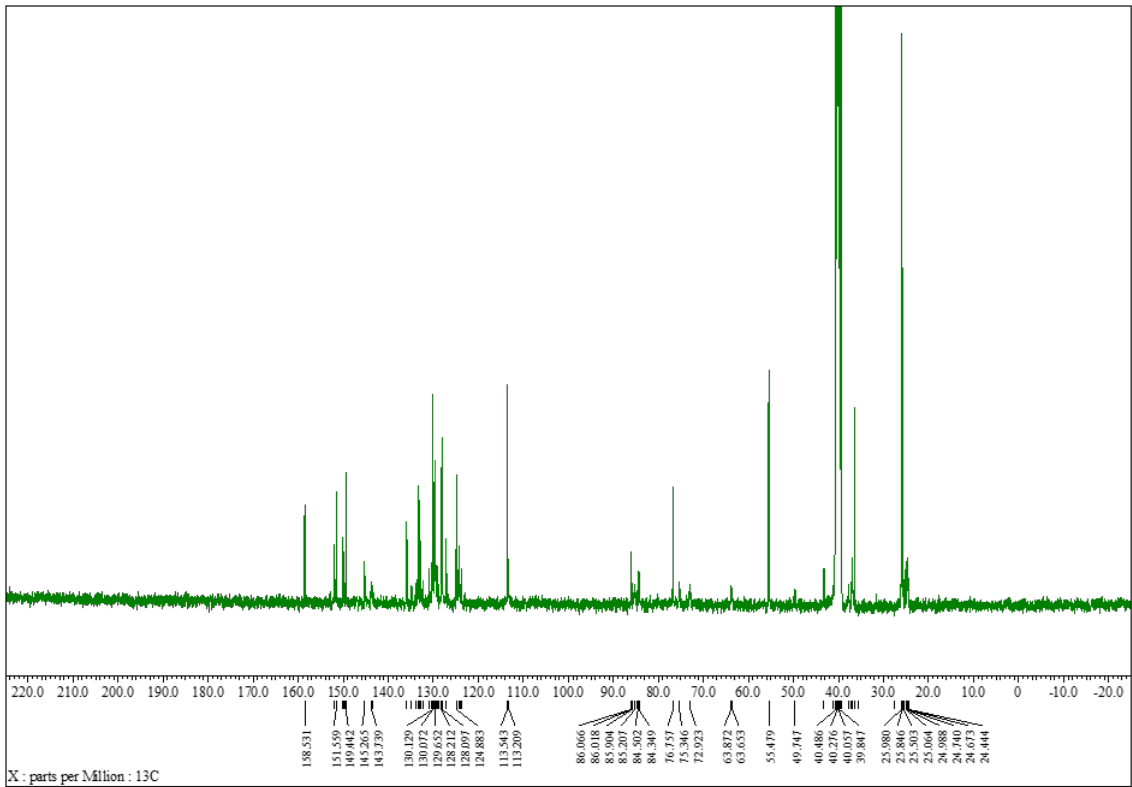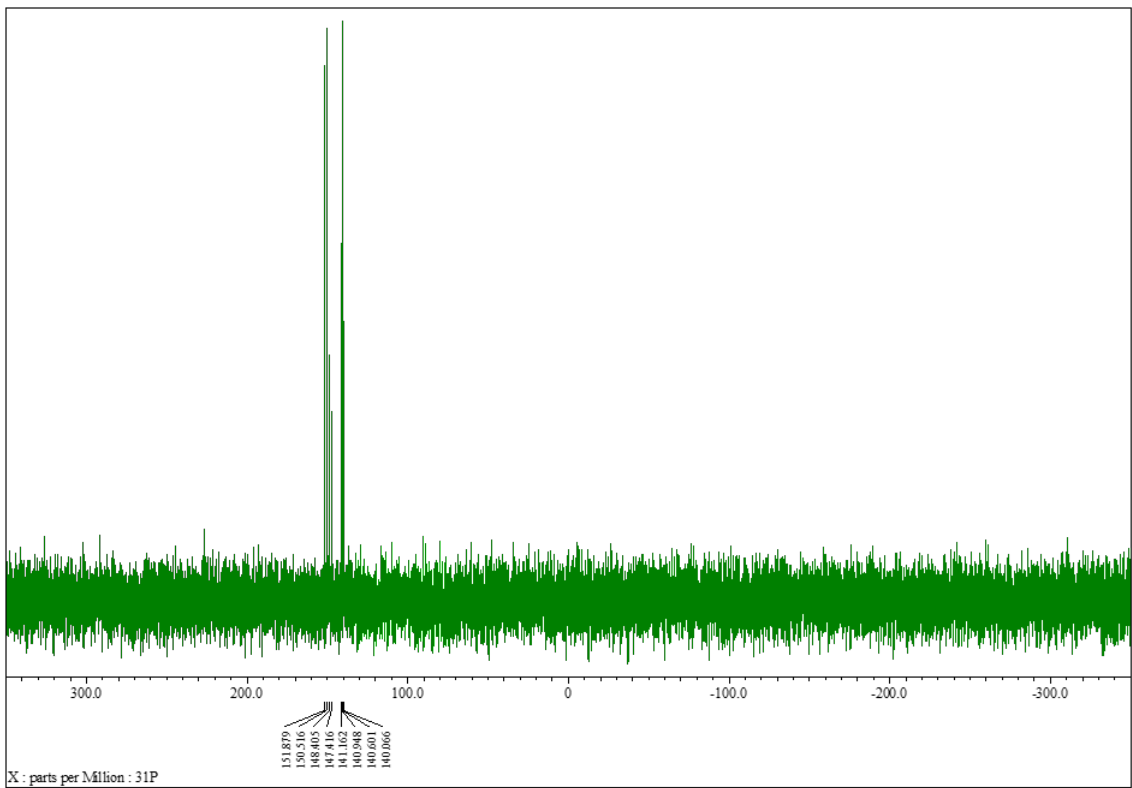

## Compound 19

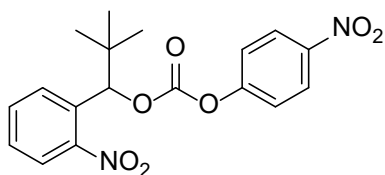

Compound **3** (100 mg, 0.478 mmol, 1 eq.) was dissolved in dichloromethane (5.00 mL). DMAP (175 mg, 1.43 mmol, 3 eq.) and 4-nitrophenyl chloroformate (231 mg, 1.15 mmol, 2.4 eq.) were added and stirred at room temperature. After stirring for 24 h, the reaction mixture was diluted with AcOEt then washed with saturated  $\text{NH}_4\text{Cl}$  aqueous solution, saturated  $\text{NaHCO}_3$  aqueous solution, followed by brine. The organic layer was dried with  $\text{Na}_2\text{SO}_4$ , filtered, and concentrated in vacuo. The crude product was purified by silica gel column chromatography (Hexane/DCM = 73/27→57/43→0/100) and Compound **19** (177 mg, 0.474 mmol, 99%) was obtained.  $^1\text{H-NMR}$  (392 MHz,  $\text{CDCl}_3$ ):  $\delta$  8.257-8.218 (m, 2H), 7.939 (dd,  $J$  = 8.0, 0.8 Hz, 1H), 7.696-7.638 (m, 2H), 7.525-7.482 (m, 1H), 7.369-7.329 (m, 2H), 6.508 (s, 1H), 1.021 (s, 9H);  $^{13}\text{C-NMR}$  (99 MHz,  $\text{CDCl}_3$ ):  $\delta$  155.489, 151.944, 149.339, 145.459, 132.669, 132.180, 129.182, 128.779, 125.330, 124.899, 121.728, 81.529, 36.521, 25.743; HRMS (ESI) calc.  $m/z$  397.1006 ( $\text{M} + \text{Na}^+$ ), found  $m/z$  397.1004 ( $\text{M} + \text{Na}^+$ ).

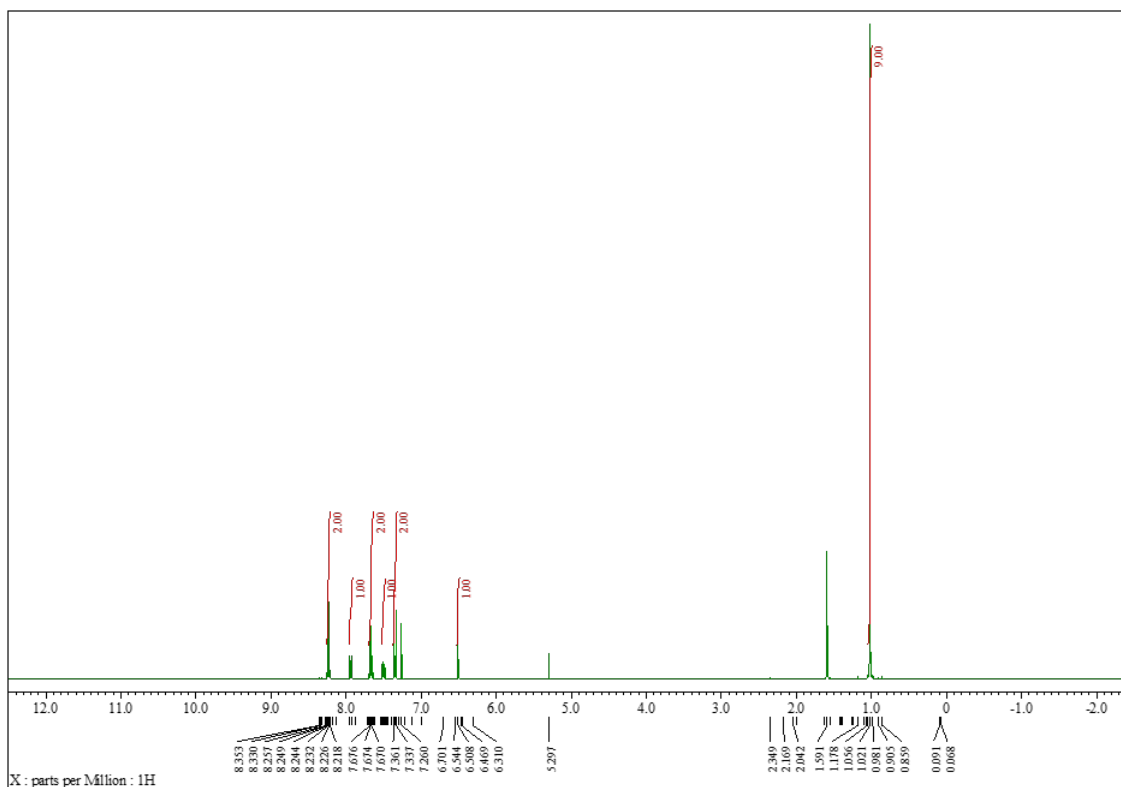

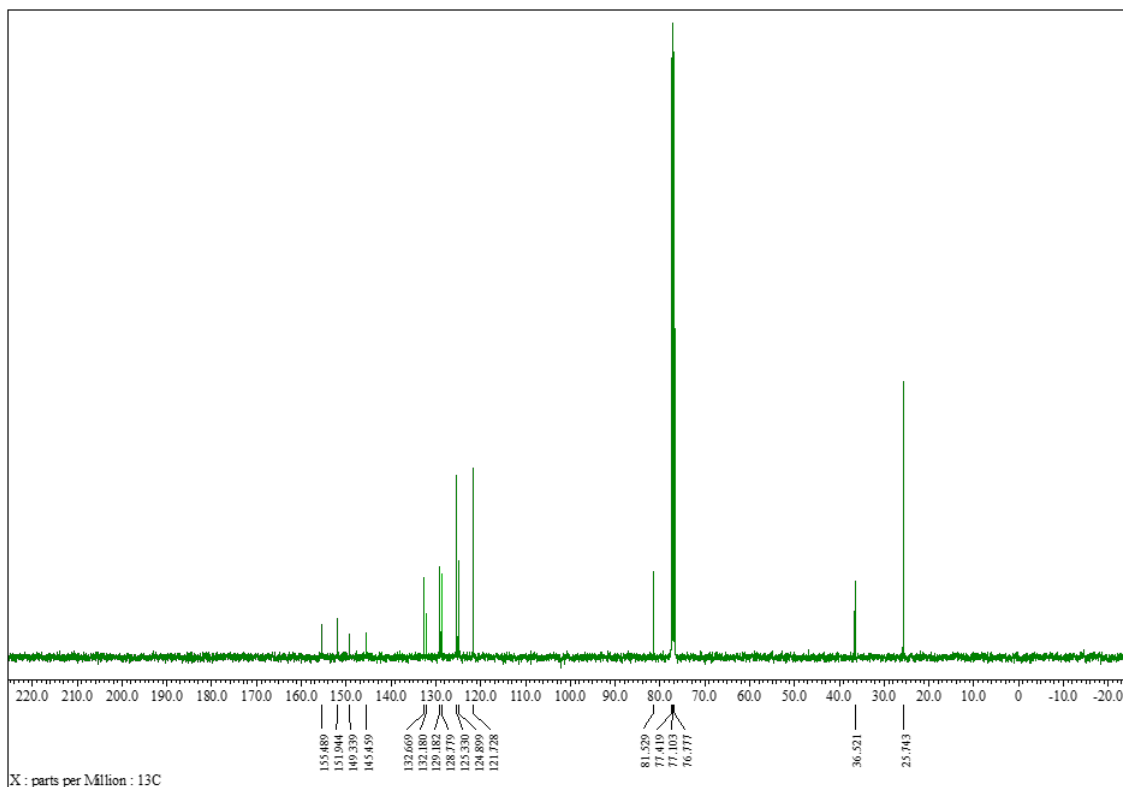

### Compound 20

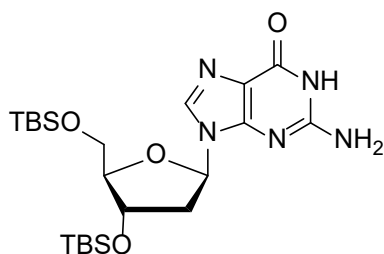

2'-deoxyguanosine hydrate (2.50 g, 8.76 mmol, 1 eq.) was dissolved in DMF (87 mL). Imidazole (3.58 g, 52.6 mmol, 6 eq.) and *tert*-butyldimethylchlorosilane (3.96 g, 26.3 mmol, 3 eq.) were added and stirred at room temperature. After stirring for 16 h, the reaction mixture was concentrated and added AcOEt then washed with saturated NaHCO<sub>3</sub> aqueous solution and brine. The precipitation was filtered and collected, and the organic layer was dried with Na<sub>2</sub>SO<sub>4</sub>, filtered, and concentrated in vacuo. The crude product was dissolved in dichloromethane and methanol then added hexane and AcOEt. The precipitation was collected and Compound **20** (3.84 g, 7.75 mmol, 88%) was obtained. <sup>1</sup>H-NMR (392 MHz, DMSO-*d*<sub>6</sub>): δ 10.775 (br, 1H), 7.869 (s, 1H), 6.619 (br, 2H), 6.098 (dd, *J* = 7.8, 6.2 Hz, 1H), 4.481 (quin, *J* = 2.8 Hz, 1H), 3.818-3.785 (m, 1H), 3.712-3.613 (m, 2H), 2.670-2.602 (m, 1H), 2.257-2.200 (m, 1H), 0.882 (s, 9H), 0.865 (s, 9H), 0.097 (s, 6H), 0.038 (s, 3H), 0.033 (s, 3H); <sup>13</sup>C-NMR (99 MHz, DMSO-*d*<sub>6</sub>): δ 157.309, 154.445, 151.523, 135.380, 117.149, 87.517, 82.640, 72.715, 63.288,

26.318, 26.212, 18.500, 18.251, -4.425, -4.933; HRMS (ESI) calc.  $m/z$  496.2770 ( $M + H^+$ ), found  $m/z$  496.2788 ( $M + H^+$ ).

※ 1 peak was same position of DMSO's peak (around 40 ppm), so 1 carbon peak was missing.

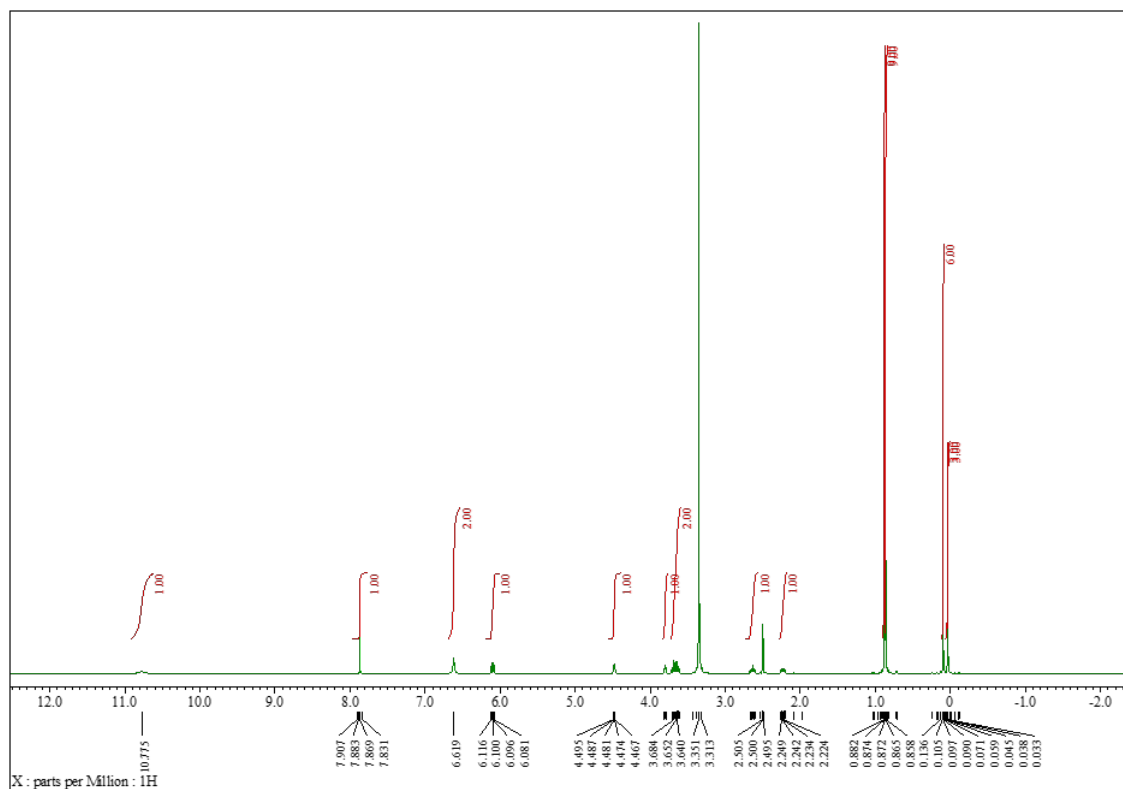



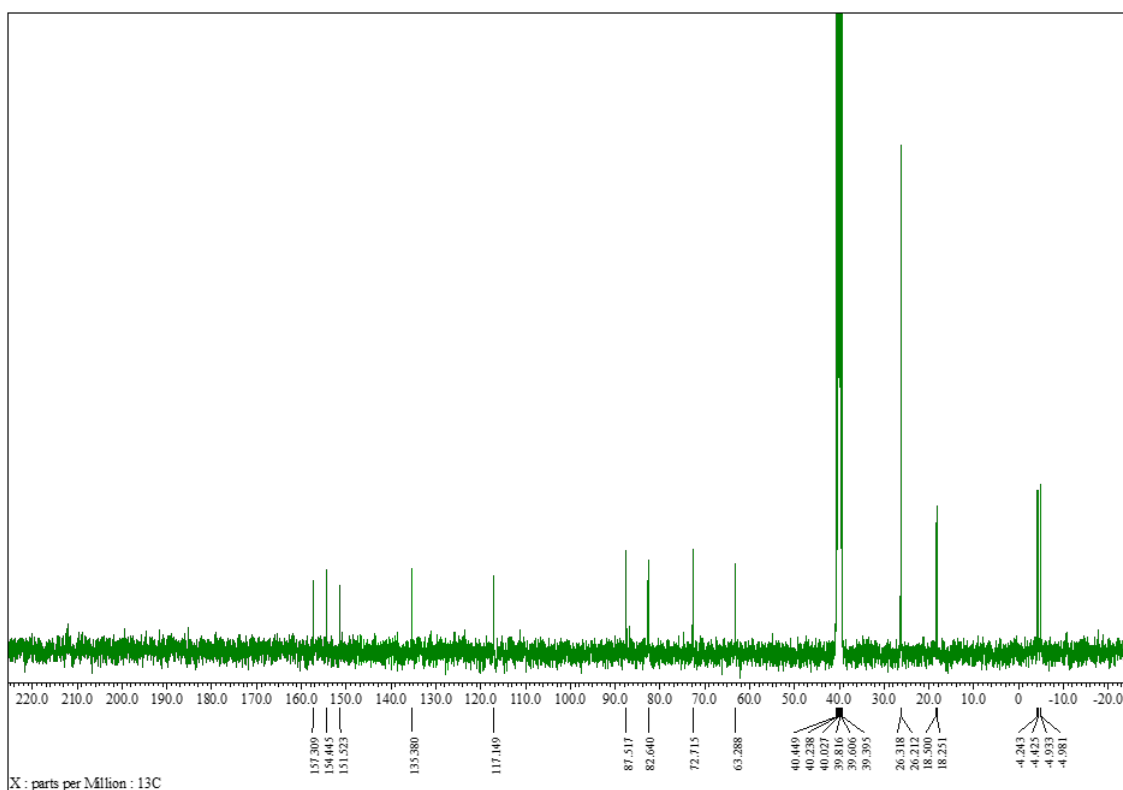

### Compound 21

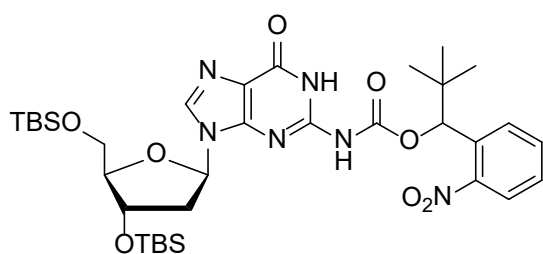

Compound **20** (100 mg, 0.202 mmol, 1.0 eq.), Compound **19** (151 mg, 0.403 mmol, 2.0 eq.), and 18-crown-6 (53.3 mg, 0.202 mmol, 1.0 eq.) were dissolved in THF (2 mL). Potassium hydride in mineral oil (30%) (27.0 mg, 0.202 mmol, 1.0 eq.) was added and stirred at room temperature. After stirring for 21 h additional, potassium hydride in mineral oil (30%) (27.0 mg, 0.202 mmol, 1.0 eq.) was added to drive the reaction to completion. After stirring for 4 h, the reaction mixture was diluted with AcOEt then washed with saturated NaHCO<sub>3</sub> aqueous solution and brine. The organic layer was dried with Na<sub>2</sub>SO<sub>4</sub>, filtered, and concentrated in vacuo. The crude product was purified by silica gel column chromatography (Hexane/AcOEt = 60/40→20/80) and Compound **21** (99.6 mg, 0.136 mmol, 68%) was obtained. <sup>1</sup>H-NMR (392 MHz, CDCl<sub>3</sub>): δ 11.084 (br, 1H), 7.957-7.908 (m, 3H), 7.626-7.584 (m, 1H), 7.549-7.465 (m, 2H), 6.551 (s, 1H), 6.231-6.193 (m, 1H), 4.569-4.561 (m, 1H), 3.985 (q, *J* = 3.5 Hz, 1H), 3.750 (d, *J* = 3.6 Hz, 2H), 2.490-2.305 (m, 2H), 0.973 (2s, 9H), 0.916 (2s, 9H), 0.898 (s, 9H),

0.105 (s, 3H), 0.102 (s, 3H), 0.072 (2s, 3H), 0.064 (2s, 3H);  $^{13}\text{C}$ -NMR (99 MHz,  $\text{CDCl}_3$ ):  $\delta$  155.374, 152.615, 149.300, 147.969, 146.263, 136.741, 132.621, 132.037, 129.230, 128.616, 124.995, 121.230, 88.111, 83.771, 79.268, 72.064, 62.886, 41.321, 36.339, 26.030, 25.829, 25.781, 18.500, 18.088, -4.684, -5.307; HRMS (ESI) calc.  $m/z$  731.3614 ( $\text{M} + \text{H}^+$ ), found  $m/z$  731.3610 ( $\text{M} + \text{H}^+$ ).

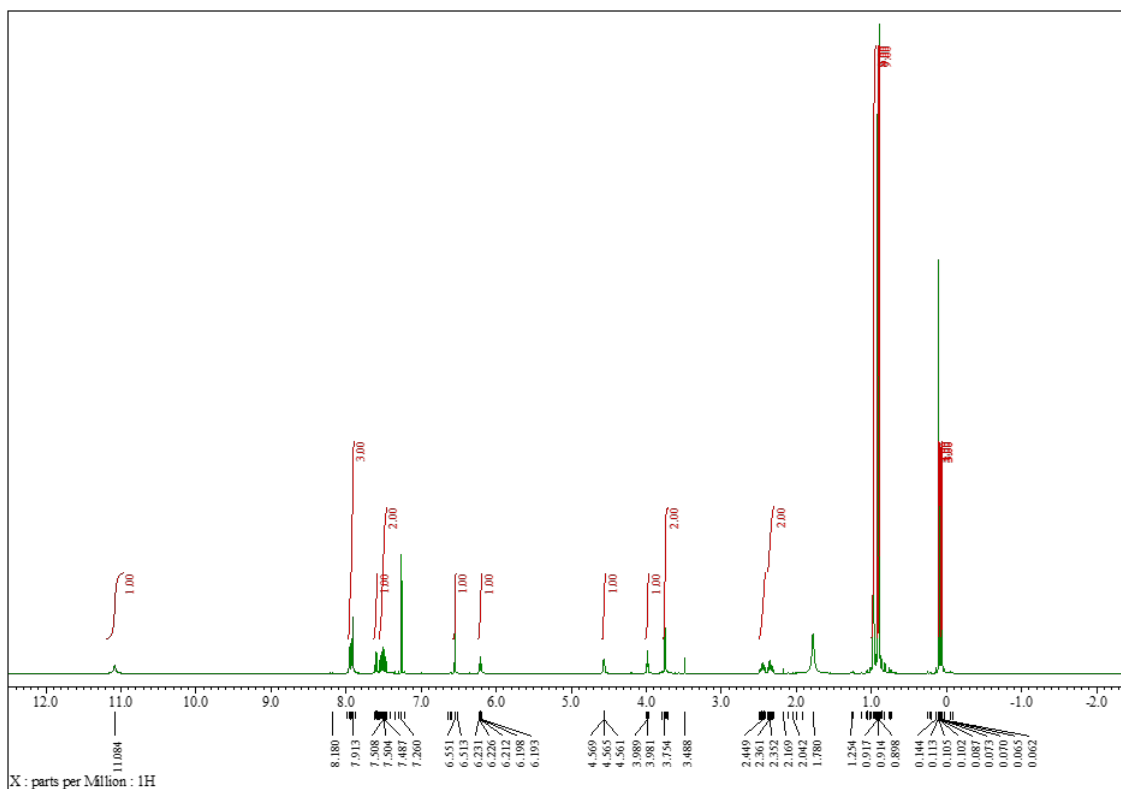

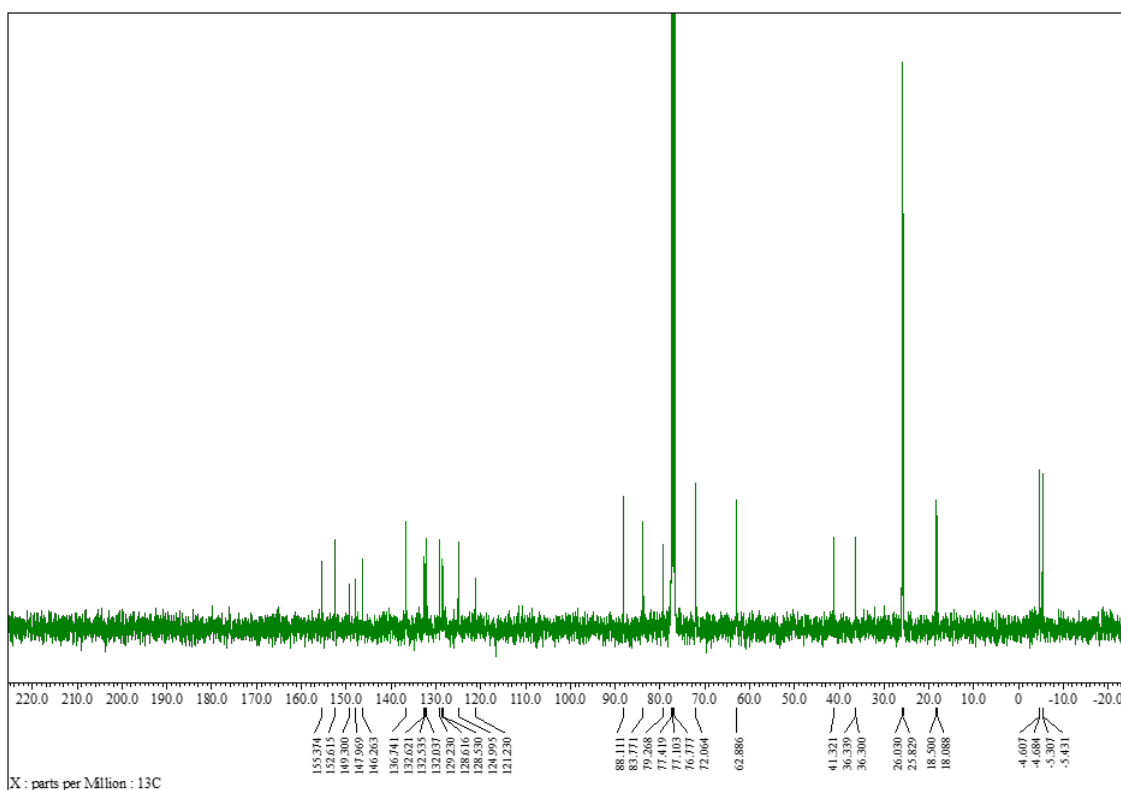

### Compound 22

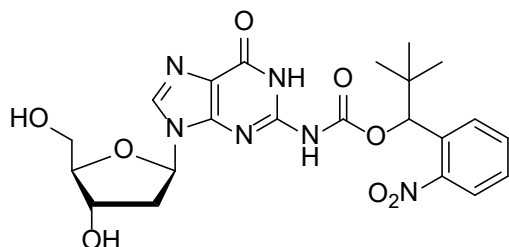

Compound **21** (85 mg, 0.116 mmol, 1.0 eq.) was dissolved in THF (1 mL). Triethylamine trihydrofluoride (28.4  $\mu$ L, 0.174 mmol, 1.5 eq.) was added and stirred at room temperature. After stirring for 16 h, the reaction mixture was concentrated in vacuo. The crude product was purified by silica gel column chromatography (DCM/MeOH = 96/4 $\rightarrow$ 94/6) and Compound **22** (54.4 mg, 0.108 mmol, 93%) was obtained.  $^1\text{H-NMR}$  (392 MHz, DMSO- $d_6$ ):  $\delta$  11.629 (br, 1H), 11.145 (br, 1H), 8.205 (s, 1H), 7.998 (dd,  $J = 8.2, 1.0$  Hz, 1H), 7.802 (t,  $J = 7.4$  Hz, 1H), 7.662-7.600 (m, 2H), 6.269 (s, 1H), 6.196 (t,  $J = 7.0$  Hz, 1H), 5.313 (d,  $J = 4.0$  Hz, 1H), 4.949 (t,  $J = 5.6$  Hz, 1H), 4.385-4.346 (m, 1H), 3.848-3.818 (m, 1H), 3.595-3.474 (m, 2H), 2.599-2.533 (m, 1H), 2.283-2.226 (m, 1H), 0.919 (s, 9H);  $^{13}\text{C-NMR}$  (99 MHz, DMSO- $d_6$ ):  $\delta$  155.546, 154.306, 149.318, 149.042, 147.573, 137.940, 133.658, 132.055, 129.995, 129.309, 125.084, 120.458, 88.269, 83.510, 77.682, 71.016, 62.003, 36.452,

25.837; HRMS (ESI) calc.  $m/z$  503.1885 ( $M + H^+$ ), found  $m/z$  503.1874 ( $M + H^+$ ).

※ 1 peak was same position of DMSO's peak (around 40 ppm), so 1 carbon peak was missing.

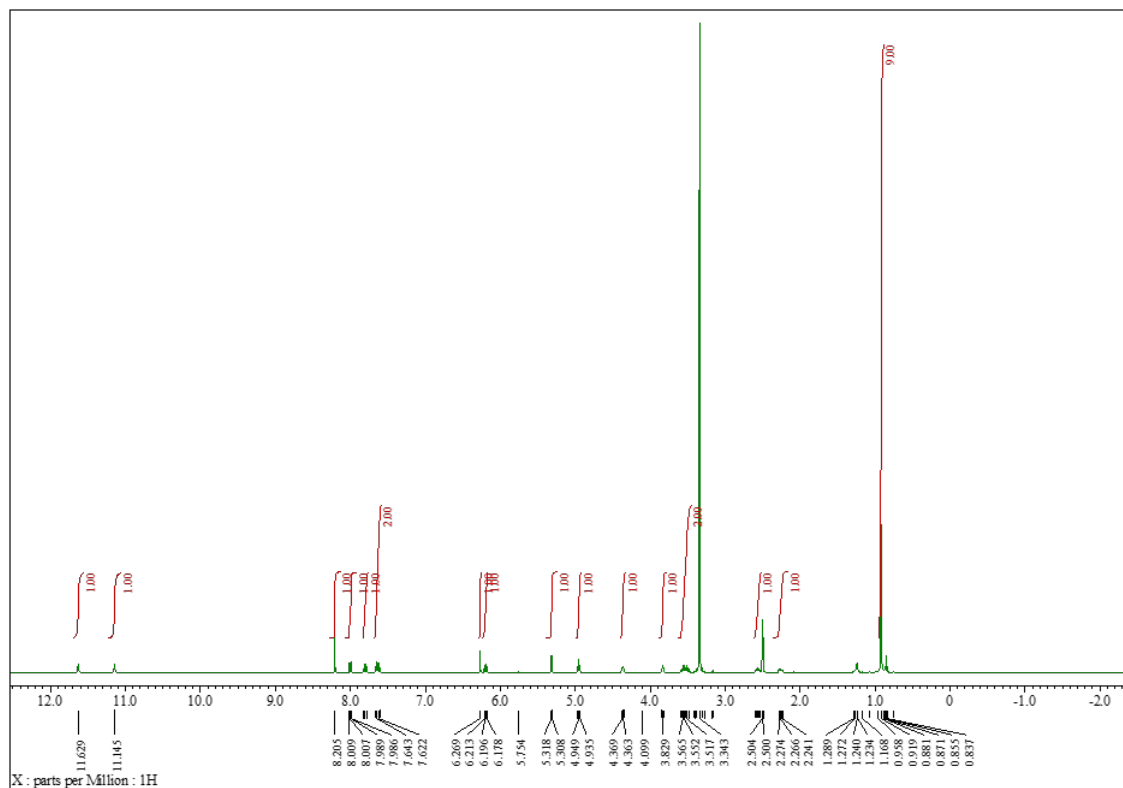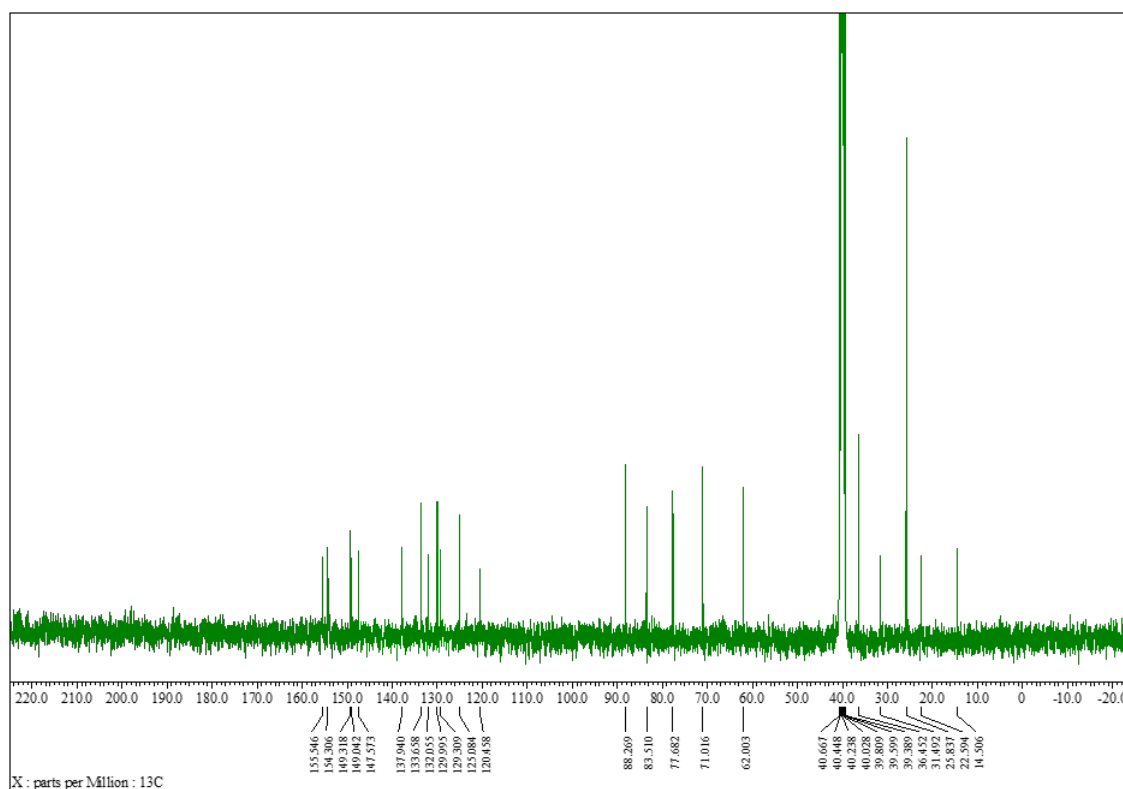

### Compound 23

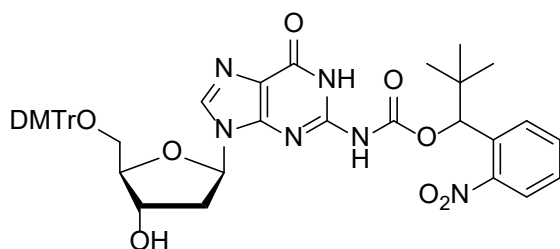

Compound **22** (350 mg, 0.697 mmol, 1.0 eq.) was dissolved in pyridine (1.75 mL). 4-dimethylaminopyridine (1.70 mg, 0.0139 mmol, 0.020 eq.) and 4,4'-dimethoxytrityl chloride (260 mg, 0.766 mmol, 1.1 eq.) were added and stirred at room temperature. After stirring for 18 h, the reaction mixture was diluted with AcOEt then washed with saturated NaHCO<sub>3</sub> aqueous solution and brine. The organic layer was dried with Na<sub>2</sub>SO<sub>4</sub>, filtered, and concentrated in vacuo. The crude product was purified by silica gel column chromatography (AcOEt/MeOH = 100/0→98/2) and Compound **23** (438 mg, 0.544 mmol, 78%) was obtained. <sup>1</sup>H-NMR (392 MHz, CDCl<sub>3</sub>): δ 11.200 (br, 1H), 8.680 (2s, 1H), 7.910-7.871 (m, 1H), 7.707 (2s, 1H), 7.582-7.525 (m, 1H), 7.495-7.423 (m, 2H), 7.402-7.362 (m, 2H), 7.289-7.127 (m, 7H), 6.774-6.726 (m, 4H), 6.483 (s, 1H), 6.179 (q, *J* = 6.4 Hz, 1H), 4.629 (dd, *J* = 5.6, 3.6 Hz, 1H), 4.109 (m, 1H), 3.736-3.714 (m, 6H), 3.303-3.292 (m, 2H), 2.707-2.622 (m, 1H), 2.461-2.395 (m, 1H), 0.890 (2s, 9H); <sup>13</sup>C-NMR (99 MHz, CDCl<sub>3</sub>): δ 158.627, 155.622, 153.076, 149.185, 148.307, 146.543, 144.673, 137.435, 135.746, 132.723, 132.074, 130.062, 129.127, 128.755, 128.135, 127.964, 127.077, 124.807, 121.183, 113.267, 86.552, 86.285, 84.187, 79.065, 72.294, 64.006, 55.288, 40.219, 36.213, 25.713; HRMS (ESI) calc. *m/z* 805.3192 (M + H<sup>+</sup>), found *m/z* 805.3205 (M + H<sup>+</sup>).

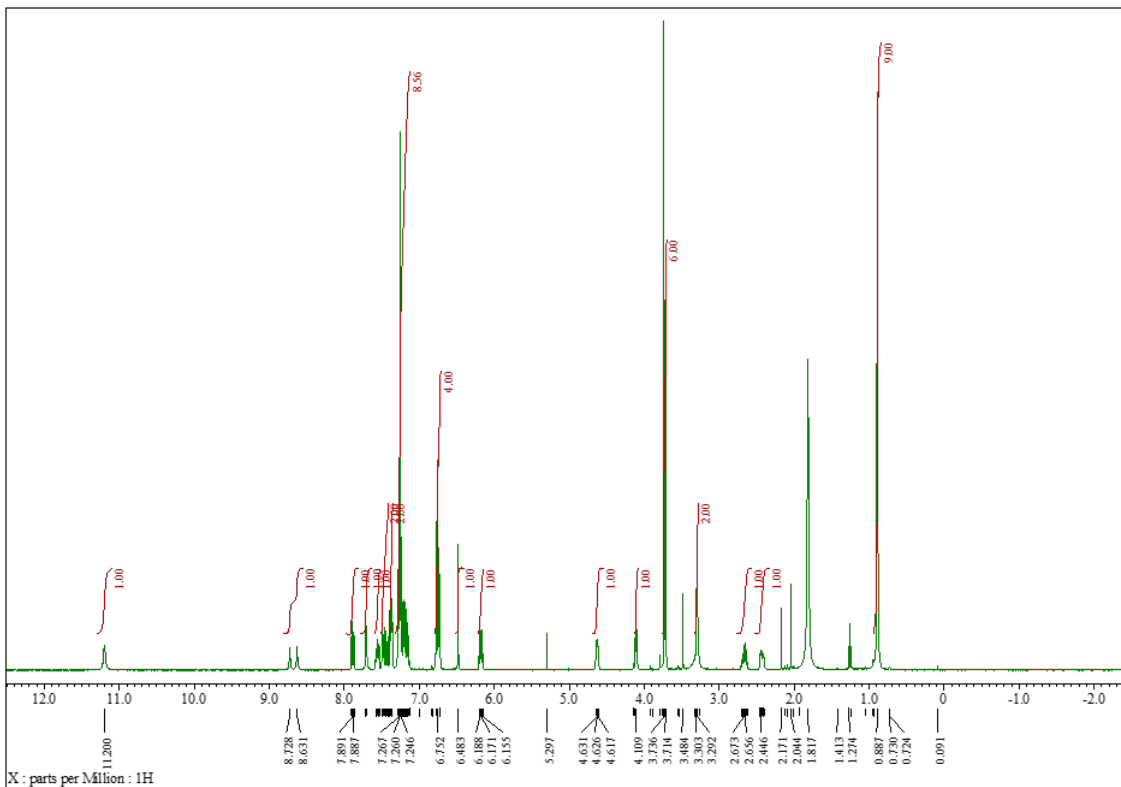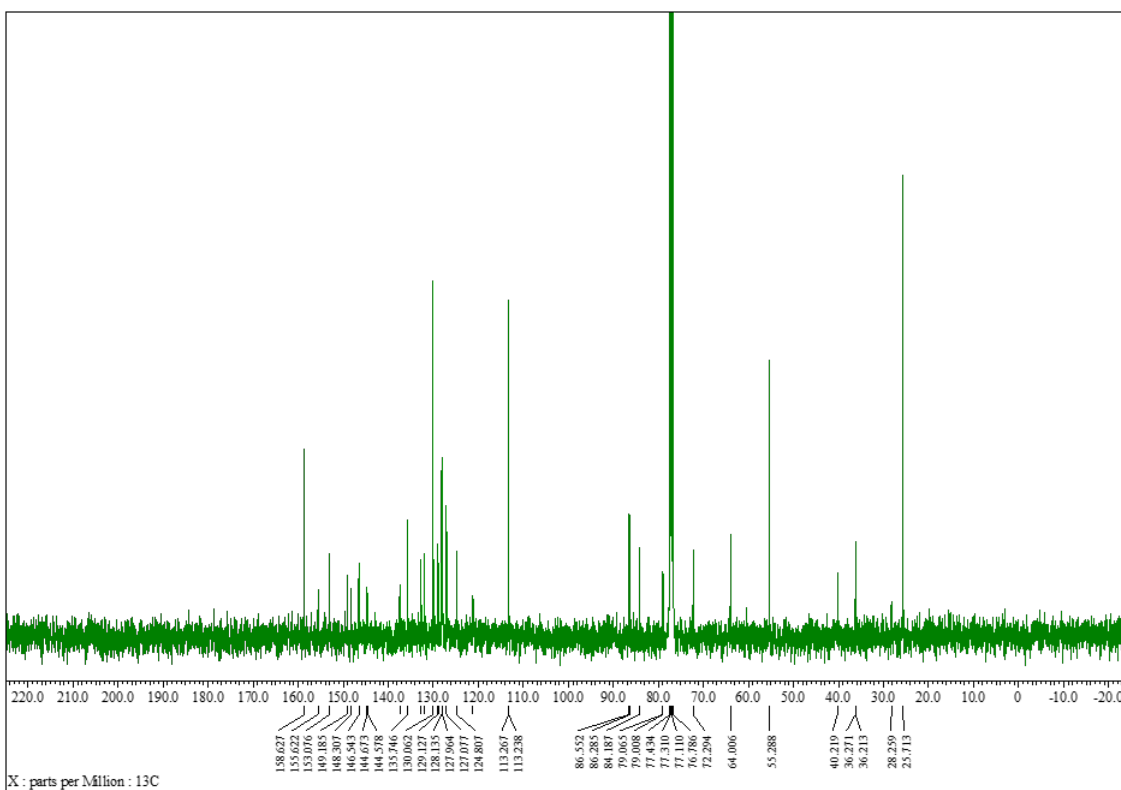

Compound 24

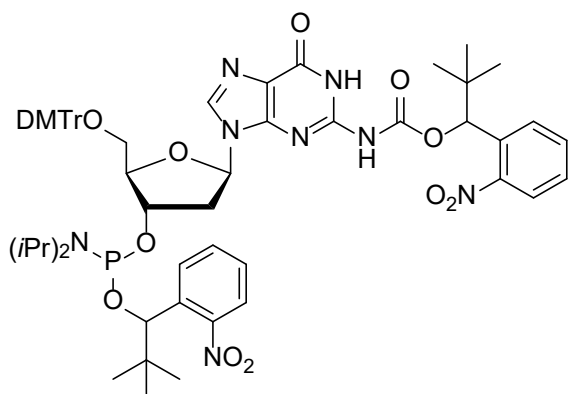

Compound **23** (400 mg, 0.497 mmol, 1.0 eq.) was co-evaporated with pyridine and dissolved in dichloromethane (1.25 mL). Compound **4** (328 mg, 0.745 mmol, 1.5 eq.) and 5-(methylthio)-1*H*-tetrazole (173 mg, 1.49 mmol, 3.0 eq.) were added at 0 °C then stirred at room temperature. After stirring for 19 h, the reaction mixture was diluted with AcOEt then washed with saturated NaHCO<sub>3</sub> aqueous solution and brine. The organic layer was dried with Na<sub>2</sub>SO<sub>4</sub>, filtered, and concentrated in vacuo. The crude product was purified by silica gel column chromatography (DCM/ACN = 100/0→95/5 with 1% TEA) and Compound **24** (194 mg, 0.170 mmol, 34%) was obtained. <sup>1</sup>H-NMR (392 MHz, DMSO-*d*<sub>6</sub>) (diastereomixture): δ 11.272-11.108 (br, 2H), 8.115-7.434 (m, 9H), 7.285-7.089 (m, 9H), 6.825-6.620 (m, 4H), 6.284-6.255 (m, 1H), 6.218-5.774 (m, 1H), 5.518-5.163 (m, 1H), 4.863-4.311 (m, 1H), 4.122-3.818 (m, 1H), 3.712-3.667 (m, 6H), 3.637-3.469 (m, 1H), 3.223-2.668 (m, 4H), 2.462-2.117 (m, 1H), 1.249-0.740 (m, 30H); <sup>13</sup>C-NMR (99 MHz, DMSO-*d*<sub>6</sub>): δ 158.550, 155.565, 154.459, 149.414, 149.337, 147.907, 145.227, 138.074, 135.842, 134.516, 133.581, 132.818, 132.208, 130.901, 130.129, 129.948, 129.509, 129.356, 128.994, 128.174, 127.163, 125.064, 124.311, 124.034, 120.858, 113.457, 86.009, 85.789, 83.586, 77.511, 75.412, 73.143, 64.282, 55.451, 50.024, 43.405, 36.862, 36.433, 25.855, 24.940, 24.692; <sup>31</sup>P-NMR (159 MHz, DMSO-*d*<sub>6</sub>): δ 152.601, 152.226, 148.752, 148.324, 141.242, 141.055, 140.922, 140.735; HRMS (ESI) calc. *m/z* 1143.4951 (M + H<sup>+</sup>), found *m/z* 1143.4901 (M + H<sup>+</sup>).

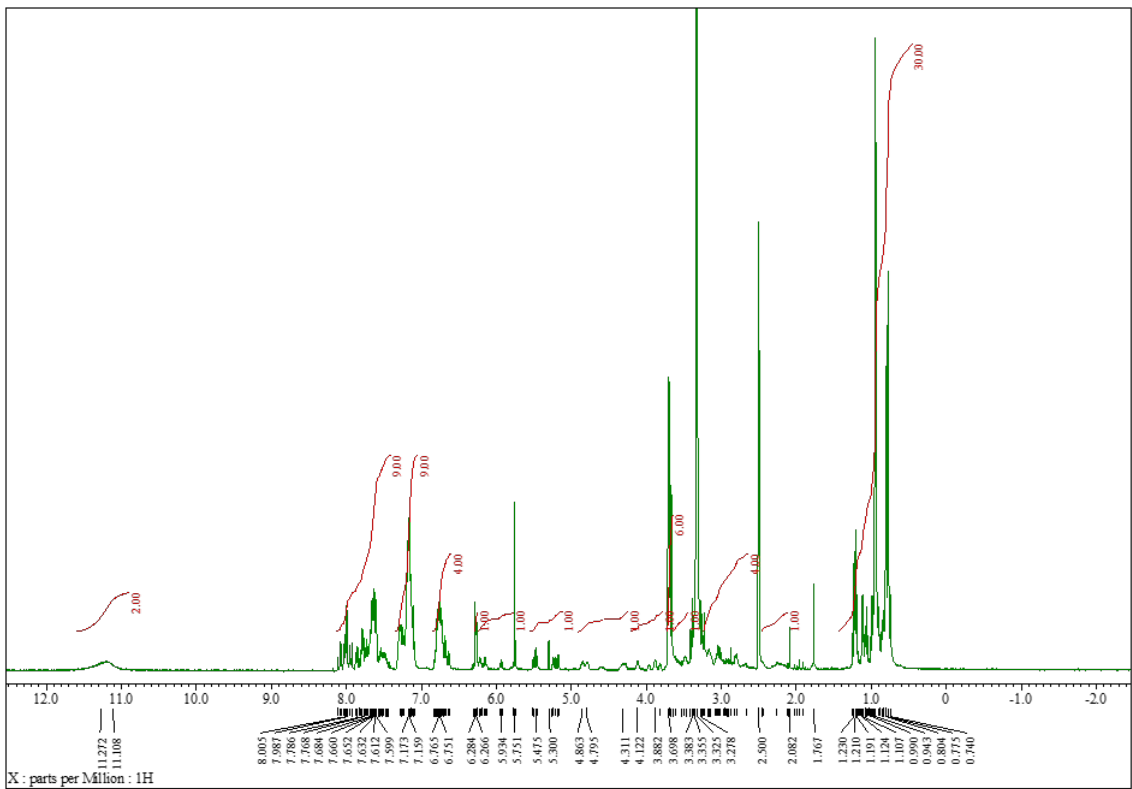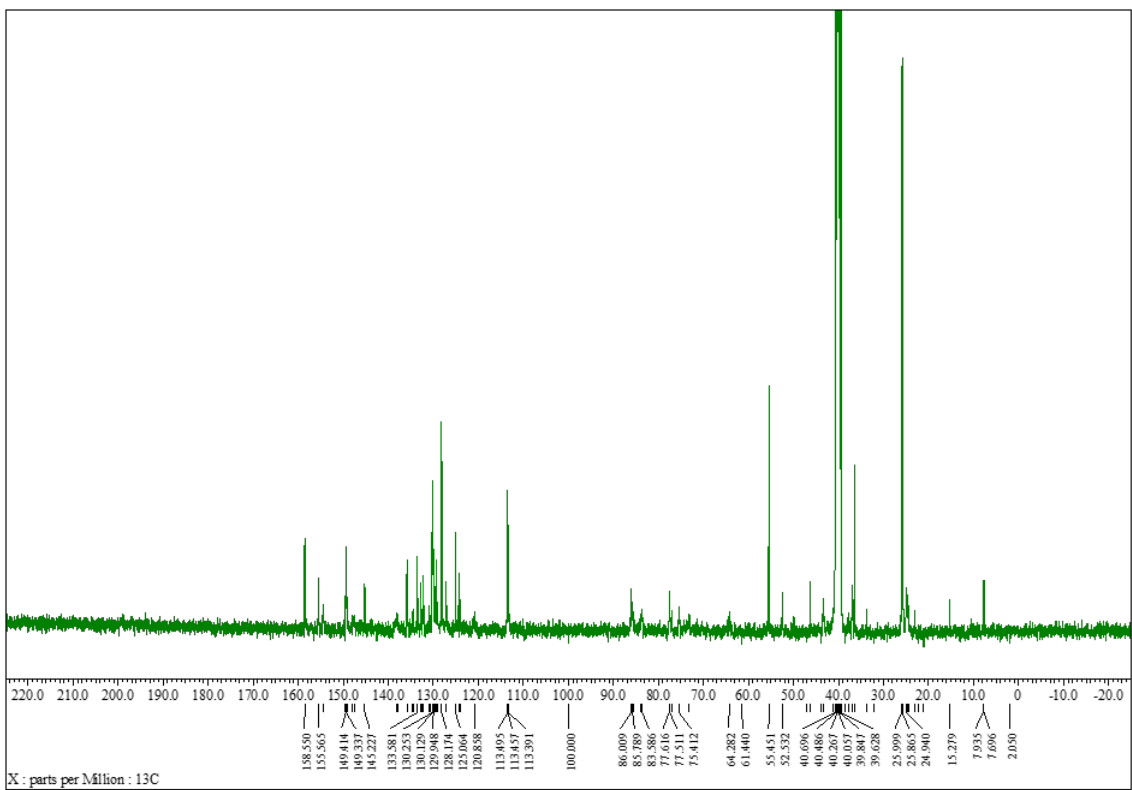



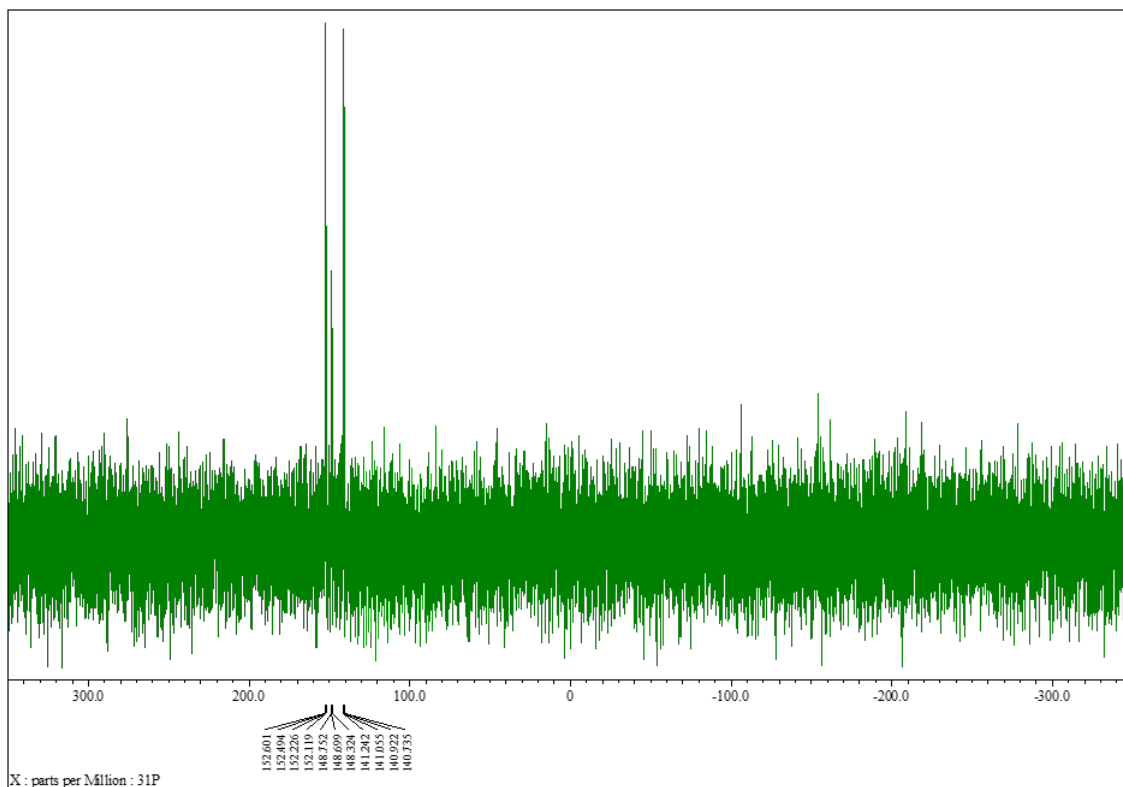

### Compound 25

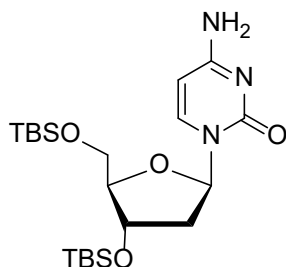

2'-deoxycytidine (2.50 g, 11.0 mmol, 1 eq.) was dissolved in DMF (110 mL). Imidazole (4.49 g, 66.0 mmol, 6 eq.) and *tert*-butyldimethylchlorosilane (4.97 g, 33.0 mmol, 3 eq.) were added and stirred at room temperature. After stirring for 20 h, the reaction mixture was diluted with AcOEt then washed with saturated NaHCO<sub>3</sub> aqueous solution and brine. The organic layer was dried with Na<sub>2</sub>SO<sub>4</sub>, filtered, and concentrated in vacuo. The crude product was purified by silica gel column chromatography (AcOEt/MeOH = 100/0→99:1→98:2→96:4) and Compound **25** (4.95 g, 10.7 mmol, 98%) was obtained. <sup>1</sup>H-NMR (392 MHz, CDCl<sub>3</sub>): δ 7.978 (d, *J* = 7.6 Hz, 1H), 6.247 (dd, *J* = 6.4, 5.2 Hz, 1H), 5.639 (d, *J* = 7.6 Hz, 1H), 4.356 (dd, *J* = 10.4, 6.0 Hz, 1H), 3.923-3.737 (m, 3 H), 2.432-2.368 (m, 1H), 2.096-2.034 (m, 1H), 0.911 (s, 9H), 0.865 (s, 9H), 0.094 (s, 3H), 0.090 (s, 3H), 0.045 (s, 3H), 0.042 (s, 3H); <sup>13</sup>C-NMR (99 MHz, CDCl<sub>3</sub>): δ 165.721, 155.949, 141.492, 93.763, 87.344, 86.013,

70.301, 62.004, 42.279, 25.992, 25.800, 18.433, 18.031, -4.847, -5.393; HRMS (ESI) calc.  $m/z$  456.2708 ( $M + H^+$ ), 478.2528 ( $M + Na^+$ ), 494.2267 ( $M + K^+$ ), found  $m/z$  456.2724 ( $M + H^+$ ), 478.2543 ( $M + Na^+$ ), 494.2283 ( $M + K^+$ ).

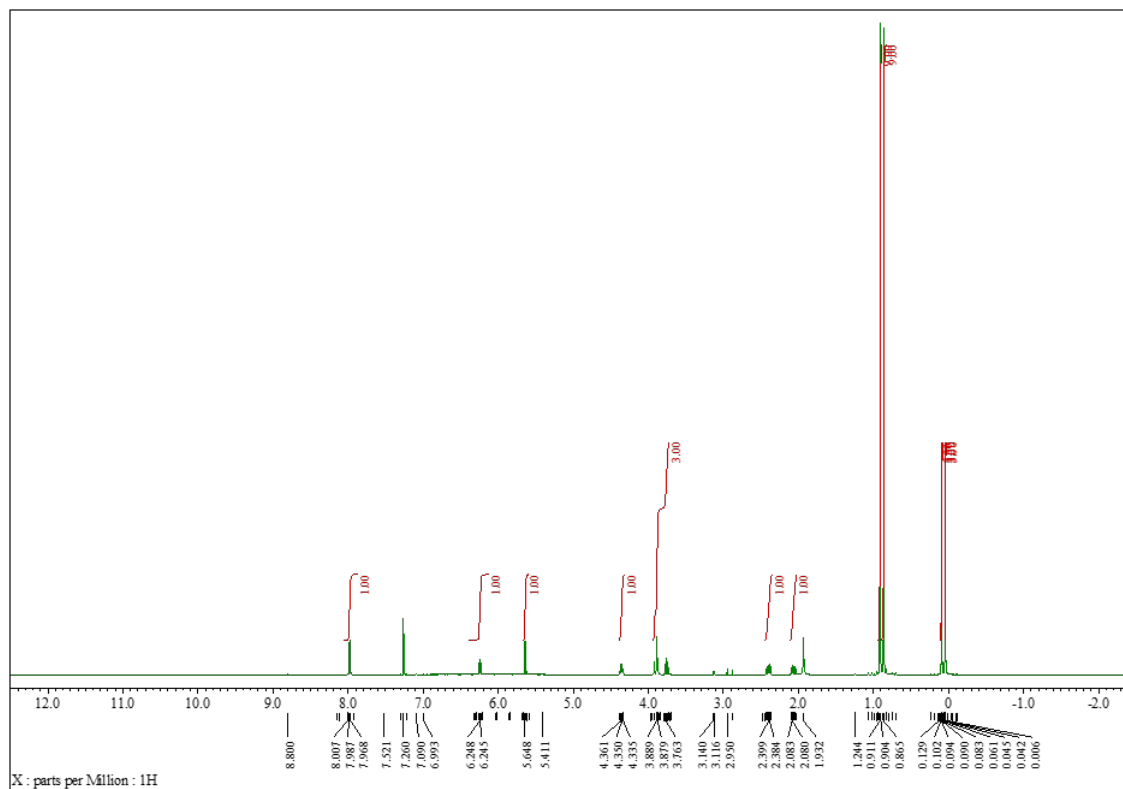

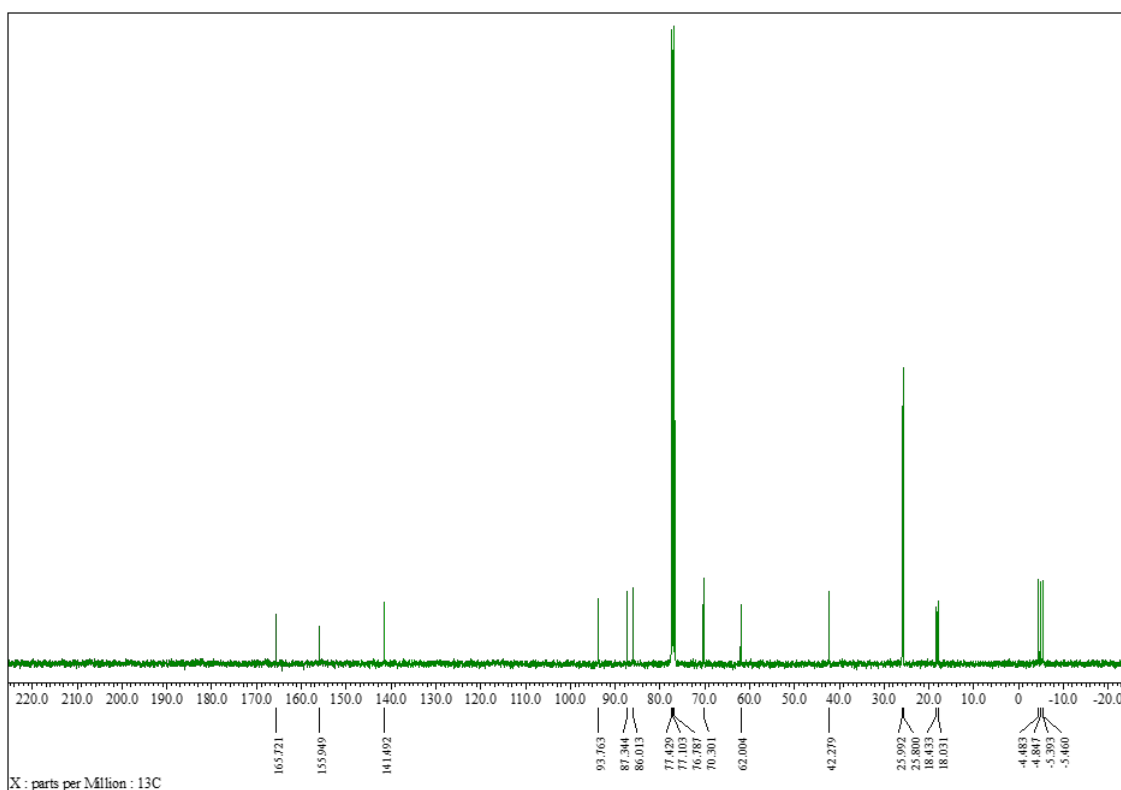

### Compound 27

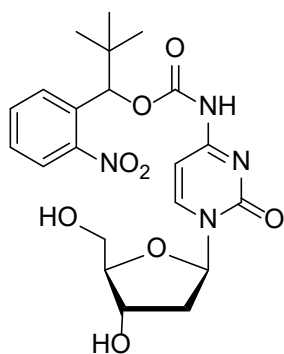

Compound **13** (998 mg, 3.29 mmol, 1.5 eq.) was dissolved in dichloromethane (20 mL). Triethyloxonium tetrafluoroborate (625 mg, 3.29 mmol, 1.5 eq.) was added and stirred at room temperature. After stirring for 2 h, Compound **26** (1.00 g, 4.78 mmol, 1 eq.) was added and stirred at room temperature. After stirring for 23 h, the reaction mixture was diluted with AcOEt then washed with saturated NaHCO<sub>3</sub> aqueous solution and brine. The organic layer was dried with Na<sub>2</sub>SO<sub>4</sub>, filtered, and concentrated in vacuo. The crude product was dissolved in THF (20 mL) and added triethylamine trihydrofluoride (1.79 mL, 11.0 mmol, 5.0 eq.). After stirring for 14 h at room temperature, the reaction mixture was concentrated and purified by silica gel column chromatography (DCM/MeOH =

99/1→95/5→90/10) and Compound **27** (920 mg, 1.99 mmol, 91%) was obtained.  $^1\text{H-NMR}$  (392 MHz,  $\text{DMSO-}d_6$ ):  $\delta$  11.008 (br, 1H), 8.274 (d,  $J = 7.6$  Hz, 1H), 7.972 (dd,  $J = 8.4, 1.2$  Hz, 1H), 7.804-7.765 (m, 1H), 7.668-7.639 (m, 1H), 7.621-7.575 (m, 1H), 6.907 (d,  $J = 5.2$  Hz, 1H), 6.213 (d,  $J = 9.6$  Hz, 1H), 6.083 (td,  $J = 6.4, 2.0$  Hz, 1H), 5.259 (dd,  $J = 4.4, 2.8$  Hz, 1H), 5.031 (td,  $J = 5.2, 2.0$  Hz, 1H), 4.222-4.162 (m, 1H), 3.837 (q,  $J = 3.6$  Hz, 1H), 3.623-3.513 (m, 2H), 2.301-2.226 (m, 1H), 2.033-1.941 (m, 1H), 0.889 (2s, 9H);  $^{13}\text{C-NMR}$  (99 MHz,  $\text{DMSO-}d_6$ ):  $\delta$  163.081, 154.697, 153.028, 149.299, 145.379, 133.591, 132.570, 129.814, 129.337, 125.007, 94.506, 88.393, 86.609, 76.853, 70.434, 61.431, 41.373, 36.385, 25.818; HRMS (ESI) calc.  $m/z$  463.1823 ( $\text{M} + \text{H}^+$ ), found  $m/z$  463.1836 ( $\text{M} + \text{H}^+$ ).

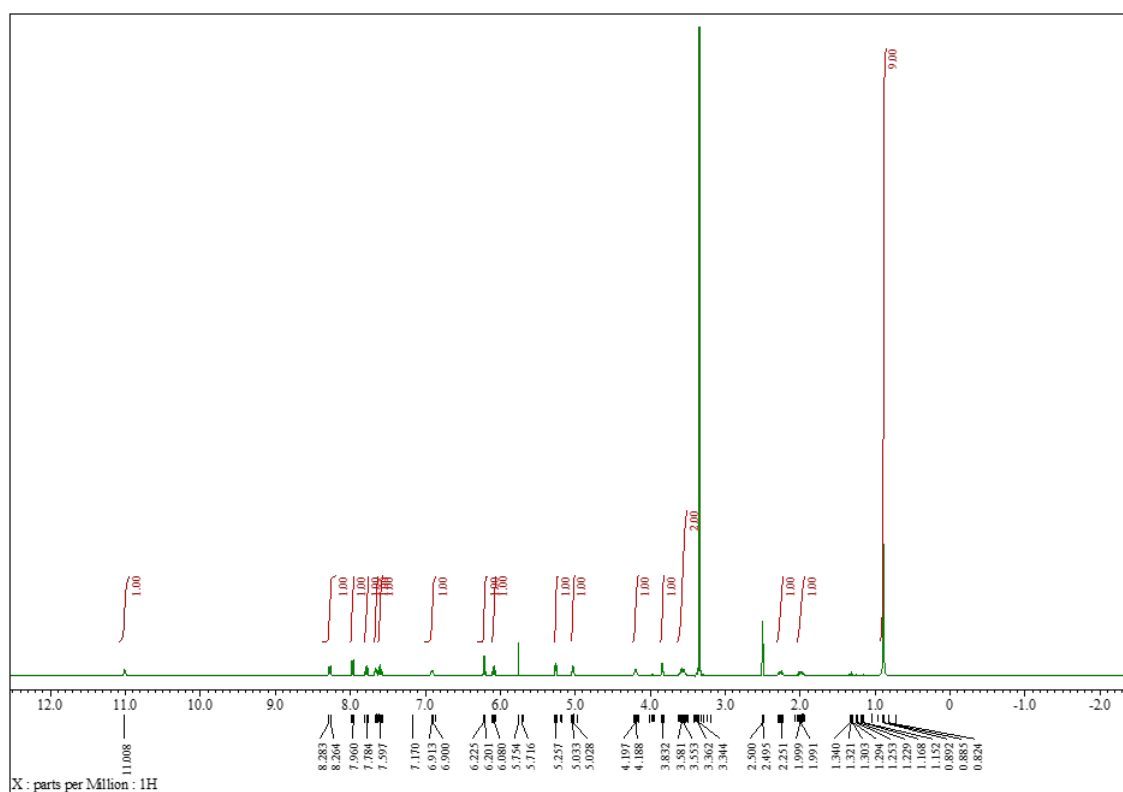

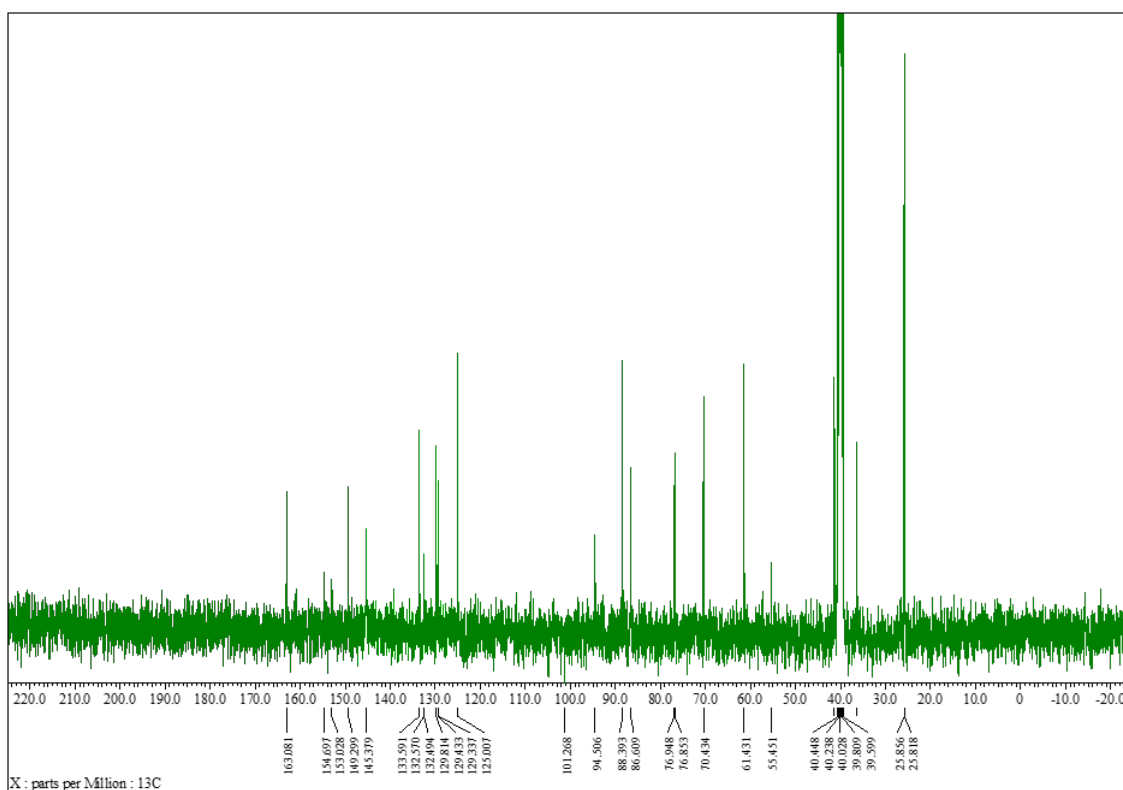

### Compound 28

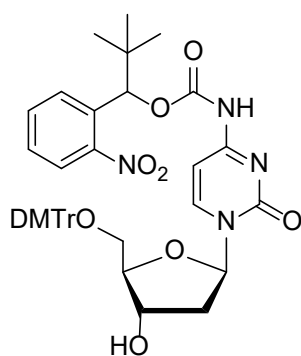

Compound **27** (900 mg, 1.95 mmol, 1.0 eq.) was dissolved in pyridine (5 mL). 4-dimethylaminopyridine (4.76 mg, 0.0390 mmol, 0.020 eq.) and 4,4'-dimethoxytrityl chloride (725 mg, 2.14 mmol, 1.1 eq.) were added and stirred at room temperature. After stirring for 24 h, the reaction mixture was diluted with AcOEt then washed with saturated NaHCO<sub>3</sub> aqueous solution and brine. The organic layer was dried with Na<sub>2</sub>SO<sub>4</sub>, filtered, and concentrated in vacuo. The crude product was purified by silica gel column chromatography (AcOEt/MeOH = 100/0→99/1) and Compound **28** (1.26 g, 1.64 mmol, 84%) was obtained. <sup>1</sup>H-NMR (392 MHz, CDCl<sub>3</sub>): δ 8.203 (t, *J* = 7.6 Hz, 1H), 8.077 (br, 1H), 7.910 (d, *J* = 8.4 Hz, 1H), 7.619-7.581 (m, 2H), 7.470-7.432 (m, 1H), 7.374-7.346 (m, 2H), 7.286-

7.172 (m, 7H), 6.930 (m, 1H), 6.835-6.796 (m, 4H), 6.497 (s, 1H), 6.249 (q,  $J = 5.6$  Hz, 1H), 4.491-4.442 (m, 1H), 4.108 (m, 1H), 3.787-3.734 (m, 6H), 3.506-3.479 (m, 1H), 3.401-3.355 (m, 1H), 2.721-2.640 (m, 1H), 2.258-2.149 (m, 1H), 0.945 (s, 9H);  $^{13}\text{C}$ -NMR (99 MHz,  $\text{CDCl}_3$ ):  $\delta$  162.270, 158.722, 155.203, 151.512, 149.814, 144.607, 144.063, 136.166, 135.498, 132.713, 130.062, 129.032, 128.221, 128.107, 127.220, 124.712, 123.882, 113.381, 94.907, 87.077, 86.438, 77.997, 70.796, 70.691, 62.613, 55.288, 41.993, 36.318, 25.789; HRMS (ESI) calc.  $m/z$  765.3130 ( $\text{M} + \text{H}^+$ ), found  $m/z$  765.3157 ( $\text{M} + \text{H}^+$ ).

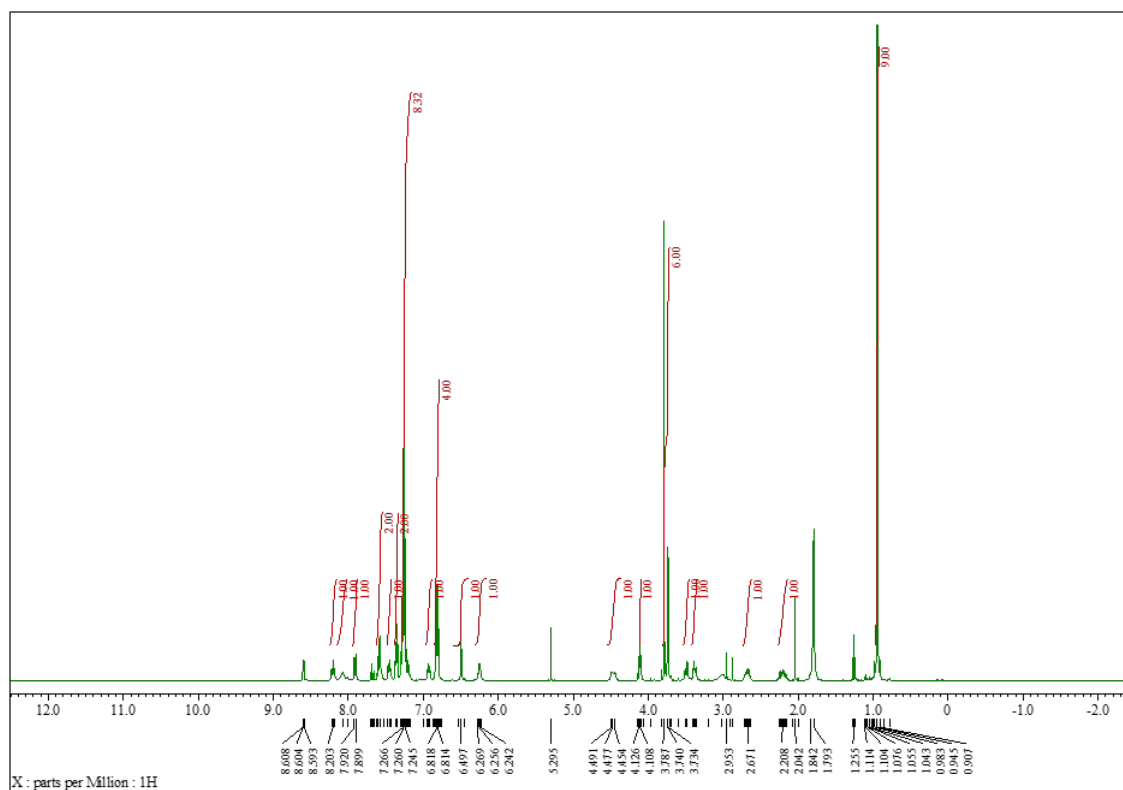

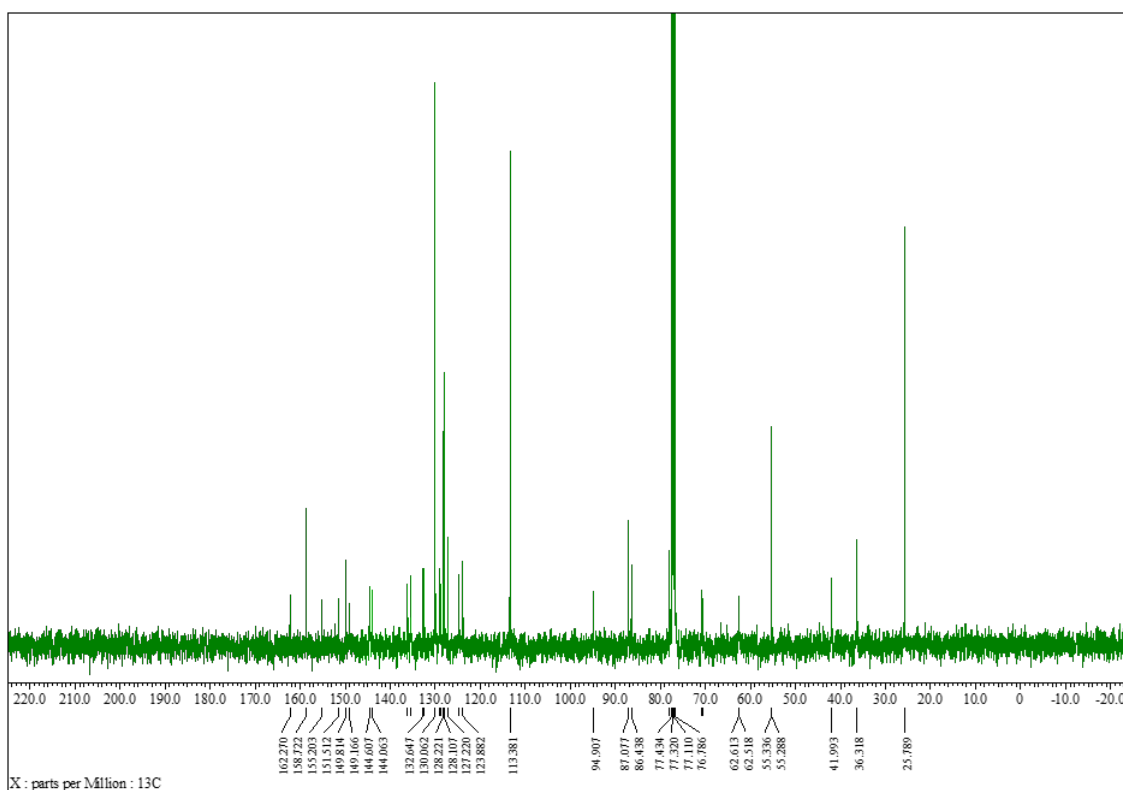

### Compound 29

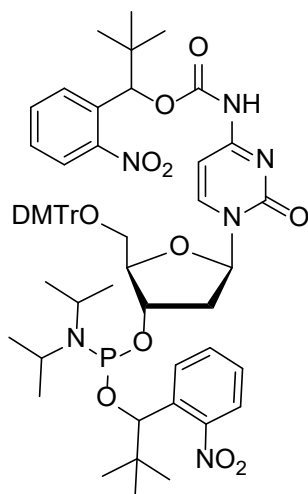

Compound **28** (500 mg, 0.654 mmol, 1.0 eq.) was co-evaporate with benzene and dissolved in dichloromethane (1.6 mL). Compound **4** (431 mg, 0.980 mmol, 1.5 eq.) and 5-(methylthio)-1*H*-tetrazole (228 mg, 1.96 mmol, 3.0 eq.) were added at 0 °C then stirred at room temperature. After stirring for 16 h, the reaction mixture was diluted with AcOEt then washed with saturated NaHCO<sub>3</sub> aqueous solution and brine. The organic layer was dried with Na<sub>2</sub>SO<sub>4</sub>, filtered, and concentrated in

vacuo. The crude product was purified by silica gel column chromatography (Hexane/AcOEt = 88/12→78/22→32/68 with 1% TEA) and Compound **29** (332 mg, 0.301 mmol, 46%) was obtained.  $^1\text{H-NMR}$  (392 MHz,  $\text{DMSO-}d_6$ ) (diastereomixture):  $\delta$  11.037 (br, 1H), 8.142-7.949 (m, 2H), 7.877-7.710 (m, 2H), 7.690-7.573 (m, 4H), 7.552-7.398 (m, 1H), 7.339-7.140 (m, 9H), 6.860-6.802 (m, 4H), 6.766-6.688 (m, 1H), 6.231-6.205 (m, 1H), 6.180-5.966, 5.777-5.665 (m, 1H), 5.513-5.448, 5.313-5.154 (m, 1H), 4.816-4.502 (m, 1H), 4.233-3.836 (m, 1H), 3.719-3.655 (m, 6H), 3.612-3.055 (m, 4H), 2.599-1.767 (m, 2H), 1.271-0.718 (m, 30 H);  $^{13}\text{C-NMR}$  (99 MHz,  $\text{DMSO-}d_6$ ):  $\delta$  163.214, 158.665, 154.459, 152.933, 149.309, 144.797, 135.670, 134.707, 134.592, 133.572, 132.742, 132.485, 132.284, 130.196, 129.824, 129.404, 129.270, 128.908, 128.355, 128.202, 127.334, 124.998, 124.321, 113.686, 94.640, 86.485, 85.207, 79.161, 76.919, 75.288, 72.275, 62.918, 55.451, 49.642, 43.224, 36.900, 36.395, 26.018, 25.818, 24.654;  $^{31}\text{P-NMR}$  (159 MHz,  $\text{DMSO-}d_6$ ):  $\delta$  152.173, 151.077, 149.073, 147.496, 141.510, 141.162, 140.521, 139.906; HRMS (ESI) calc.  $m/z$  1103.4889 ( $\text{M} + \text{H}^+$ ), found  $m/z$  1103.4868 ( $\text{M} + \text{H}^+$ ).

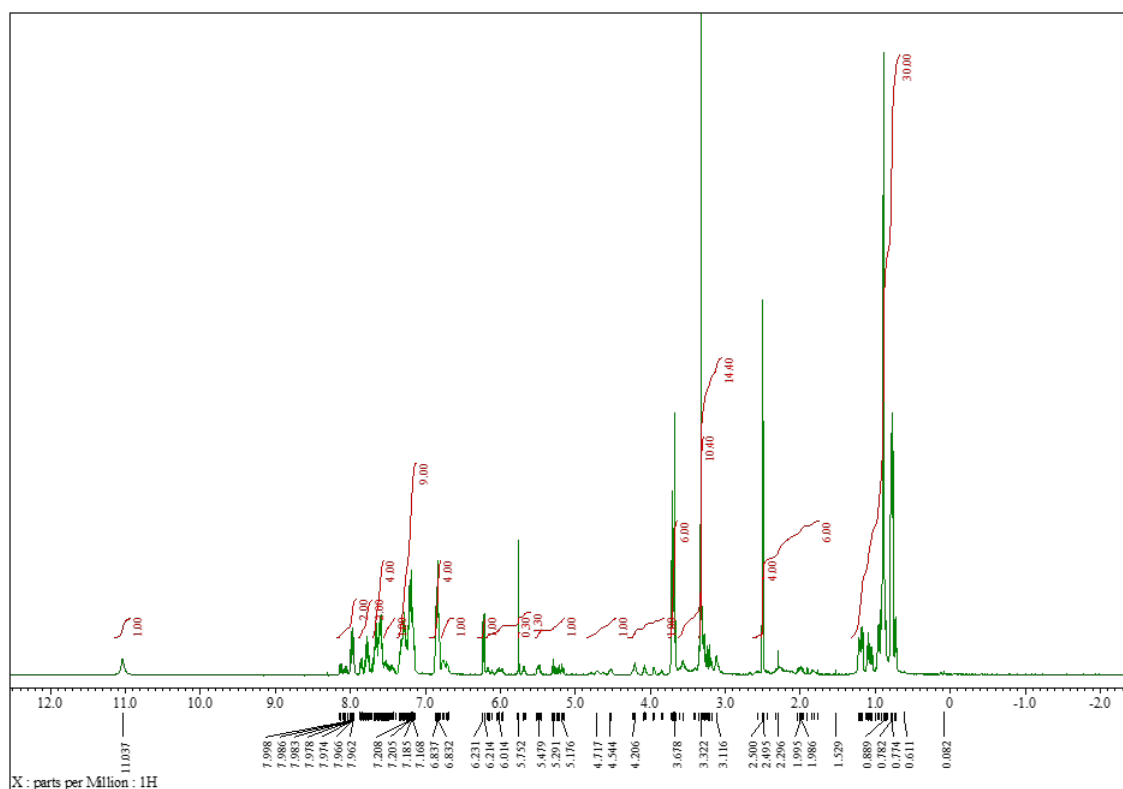



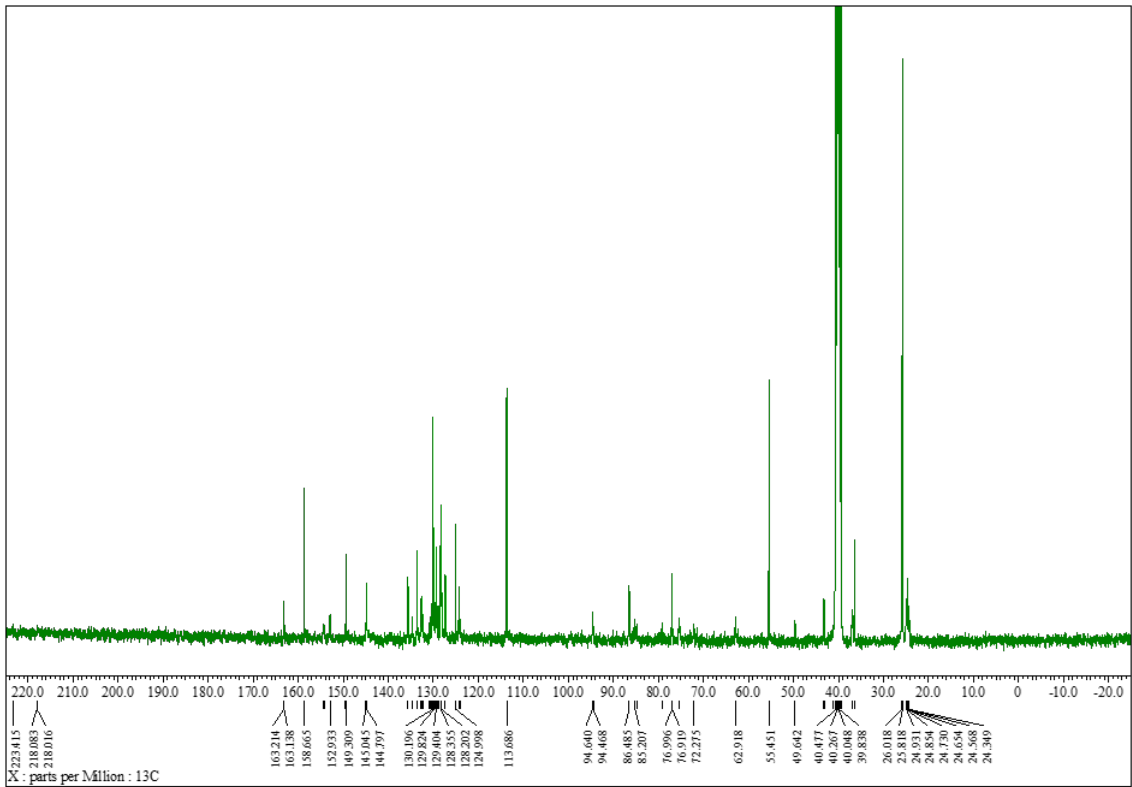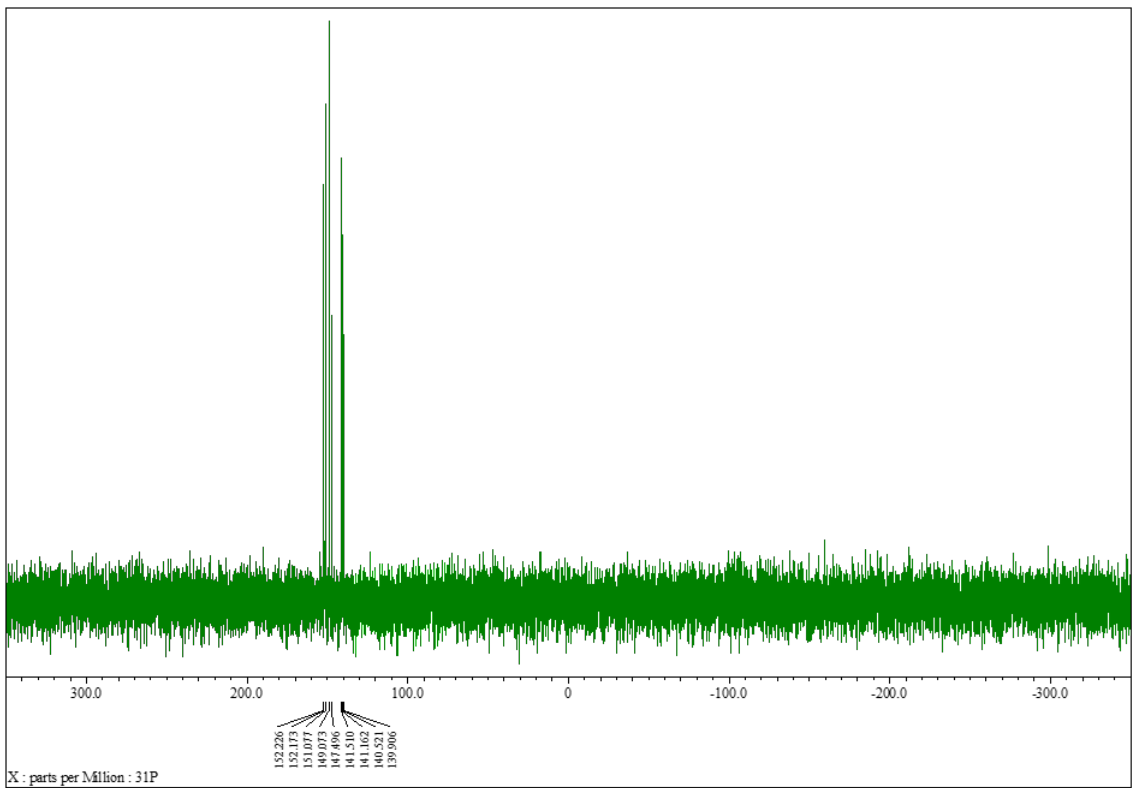

### **Synthesis of DNA containing *o*-nitrobenzyl modifications**

DNA containing *o*-nitrobenzyl modifications were synthesized by an automated DNA synthesizer (NRs-4A10R7NP, Nihon Techno Service). The synthesis was carried out at 0.2  $\mu$ mol scale with DMTr-off using standard phosphoramidite chemistry. Since the coupling yield of amidites containing *o*-nitrobenzyl modification was low due to its steric hindrance, the coupling time was extended to 15 min. The phosphoramidite reagents for the natural nucleotide were as follows: deoxyadenosine (n-PAC) CED phosphoramidite (ANP-6661, ChemGenes), deoxyguanosine (n-tBPAC) CED phosphoramidite (ANP-5668, ChemGenes), deoxycytidine (n-acetyl) CED phosphoramidite (ANP-5560, ChemGenes), and thymidine CED phosphoramidite (ANP-5554, ChemGenes). The CPG supports for the natural nucleotide were as follows: deoxyadenosine (n-PAC) 3'-Icaa CPG 1000Å (N-P5101-10, ChemGenes), deoxyguanosine (n-PAC) 3'-Icaa CPG 1000Å (N-P-5103-10, ChemGenes), deoxycytidine (n-acetyl) 3'-Icaa CPG 1000Å (N-5212-10, ChemGenes), and thymidine 3'-Icaa CPG 1000Å (N-5104-10, ChemGenes). The 5'-phosphorylation was performed by 5'-Phosphate-ON-Reagent (CLP-1544, ChemGenes).

After synthesis, deprotection was performed by concentrated ammonia solution (1 mL) at room temperature for 16 hours. The CPG was then removed using a filter (Millex-LCR, 0.45  $\mu$ m), and the solution was concentrated using a centrifugal evaporator. Subsequently, denaturing PAGE purification was performed to obtain the desired length DNA. Following that, reverse-phase HPLC purification was performed using YMC Hydrosphere C18 column (250  $\times$  4.6 mm I.D., S-5  $\mu$ m, 12 nm) with either HITACHI Chromaster system (pump: 5110, diode array detector: 5430) or HITACHI ELITE LaChrom system (pump: L-2130, diode array detector: L-2455). This separation was based on the presence or absence of the *o*-nitrobenzyl group, and the desired DNA was obtained. For this purpose, Solution A, consisting of 50 mM TEAA containing 5% ACN, and Solution B, consisting of ACN, were used as eluent. The flow rate was set at 1 mL/min, and a liner gradient was applied, increasing Solution B from 0% to 60% over 20 minutes. The column temperature was maintained at 50  $^{\circ}$ C. Each DNA was identified based on its molecular weight obtained by LCMS (1260 Infinity II Prime LC, Agilent, or ACQUITY UPLC H-Class PLUS, Waters).

Sequences and molecular weight of synthesized DNA are shown in Table S1.

ODN\_23-25, 33, 36, 39, 40, 45-47, and 54, which do not contain *o*-nitrobenzyl modifications, were purchased from Eurofins and used without further purification or MS analysis.

### **Thermal stability evaluation of DNA containing *o*-nitrobenzyl modifications**

Samples were prepared with 10  $\mu$ M ODN in 1  $\times$  Thermo pol. Buffer (New England Biolabs) and subjected to a thermal cycle of [ (95  $^{\circ}$ C, 1 min  $\rightarrow$  50  $^{\circ}$ C, 30 sec  $\rightarrow$  72  $^{\circ}$ C, 3 min)  $\times$  30 ] using a T100 Thermal Cycler (Bio-Rad). They were then subjected to reverse-phase HPLC analysis on a YMC Hydrosphere C18 column (250  $\times$  4.6 mm I.D., S-5  $\mu$ m, 12 nm) using a HITACHI Chromaster (pump:

5110, diode array detector: 5430) or HITACHI ELITE LaChrom (pump: L-2130, diode array detector: L-2455). Solution A, consisting of 50 mM TEAA containing 5% ACN, and Solution B, consisting of ACN, were used as eluent. The flow rate was set at 1 mL/min, and a liner gradient was applied, increasing Solution B from 0% to 60% over 20 minutes. The column temperature was maintained at 50 °C.

#### **Evaluation of removal of *o*-nitrobenzyl groups by photo irradiation**

Samples were prepared with 10 µM ODN in water, and irradiated with 365 nm light at an intensity of 4 mW/cm<sup>2</sup> for 10 min using a MAX-350 compact xenon light source (Asahi Spectra). Samples were then subjected to reverse-phase HPLC analysis on a YMC Hydrosphere C18 column (250 × 4.6 mm I.D., S-5 µm, 12 nm) in the same method as in the experiment described above. Also, photo irradiated samples were subjected to LCMS to check Mass on ACQUITY UPLC BEH C18 Column (130 Å, 1.7 µm, 2.1 mm × 50 mm) using Agilent 1290 Infinity II and Agilent 6530 LC/Q-TOF. Solution A, consisting of 8.6 mM TEA / 100 mM HFIP, and Solution B, consisting of MeOH, were used as eluent. The flow rate was set at 0.3 mL/min, and a liner gradient was applied, increasing Solution B from 0% to 50% over 12 minutes. The column temperature was maintained at 60 °C. Obtained mass spectra were deconvoluted by Agilent MassHunter BioConfirm Software 12.0.

#### **Primer extension assay using 6 kinds of DNA polymerases**

Samples were prepared in a total volume of 20 µL with 1 µM ODN<sub>25</sub>, 2 µM template, 0.2 mM dNTPs, 0.02 U/µL DNA polymerase in 1 × provided polymerase buffer. For DNA polymerase, KOD-Plus-Neo (Takara), PrimeSTAR HS (Takara), Pfu DNA polymerase (Promega), Phusion High Fidelity DNA polymerase (New England Biolabs), Q5 High Fidelity DNA polymerase (New England Biolabs), and Deep Vent DNA polymerase (New England Biolabs) were used and prepared the samples as per manufacturers instructions. Samples were reacted in a T100 Thermal Cycler at (95 °C, 1 min → 50 °C, 30 sec → 72 °C, 30 min). Afterwards, the reaction solution was mixed with an equal volume of 2×formamide loading solution (80% formamide, 10 mM EDTA (pH 8.0)), and then subjected to 20% denaturing PAGE analysis [20 (w/v)% acrylamide (ratio of acrylamide and bis-acrylamide was 19:1), 7.5 M urea, 1×Tris -borate-EDTA (TBE) buffer]. Each band was detected by fluorescence of FAM labeling of the primer using the ChemiDoc Touch MP imaging system (Bio-Rad). Stopping efficiency at the position of modification introduction was calculated using the ratio of band intensity to the positive control (ODN<sub>23</sub>).

#### **Primer extension assay under PCR condition**

Samples were prepared in a total volume of 10 µL with 1 µM ODN<sub>25</sub>, 2 µM template, 0.2 mM dNTPs, 0.02 U/µL Phusion High Fidelity in 1× Phusion High Fidelity buffer. ODN<sub>4</sub>, 8-22 were used as a

template. They were subjected to a thermal cycle of [ (95 °C, 1 min→55 °C, 15 sec→72 °C, 30 sec)×30] in T100 Thermal Cycler. The reaction solution was then mixed with an equal volume of 2×formamide loading solution, and then subjected to 20% denaturing PAGE analysis. Each band was detected by fluorescence of FAM labeling of the primer using the ChemDoc Touch MP imaging system. Stopping efficiency was calculated as the percentage of band intensity at each position, where the target was the position of modification introduction and the sum of five band intensities ( $\pm 1$ ,  $\pm 2$  bases before and after the target) was set as 100%.

### **Confirmation of sticky ends formation using XhoI**

PCR samples were prepared in a total volume of 800  $\mu$ L with 0.1  $\mu$ M ODN\_35, 0.2  $\mu$ M ODN\_36, 0.25 ng/ $\mu$ L  $\lambda$  phage genome (New England Biolabs), 0.2 mM dNTPs, 0.04 U/ $\mu$ L Phusion High Fidelity in 1× Phusion High Fidelity buffer. The prepared mixture was divided into two equal parts, each with a volume of 400  $\mu$ L. One was irradiated with 365 nm light at an intensity of 4 mW/cm<sup>2</sup> for 15 min using a MAX-350 compact xenon light source, designated as UV (+), and the other was UV (-). They were subjected to PCR with a thermal cycle of [ (98 °C, 10 sec→55 °C, 30 sec→72 °C, 90 sec) × 30] in T100 Thermal Cycler. After the reaction, UV (-) was irradiated with 365 nm light at an intensity of 4 mW/cm<sup>2</sup> for 15 min. After alcohol precipitation, 0.8% agarose gel electrophoresis and gel extraction were performed using the Wizard SV Gel and PCR Clean-UP System (Promega) to obtain the target DNA fragments.

The obtained DNA fragments were subjected to XhoI treatment. Samples were prepared in 150 ng/ $\mu$ L UV (-/+) in 1× Cut Smart Buffer (New England BioLabs) in a total volume of 10  $\mu$ L. To the prepared samples, 0.75  $\mu$ L of XhoI (Takara, 10 U/ $\mu$ L) was added and incubated at 37 °C for 2 hours. The reaction solution was then analyzed by 16% native PAGE. Each band was stained with SYBR Green II and detected with a ChemiDoc Touch MP imaging system.

### **Ligation of 2 kbp and 3 kbp DNA fragments synthesized by stop primer**

PCR samples were prepared with 0.1  $\mu$ M stop primer, 0.2  $\mu$ M primer, 0.25 ng/ $\mu$ L  $\lambda$  phage genome, 0.2 mM dNTPs, 0.04 U/ $\mu$ L Phusion High Fidelity in 1 × Phusion High Fidelity buffer in a total volume 200  $\mu$ L in 1 × Phusion High Fidelity buffer. The primer combinations are as follows; 2 kbp fragment (50 nt sticky ends): ODN\_33 and ODN\_34, 3 kbp fragment (50 nt sticky ends): ODN\_35 and ODN\_36, 2 kbp fragment (20 nt sticky ends): ODN\_33 and ODN\_37, 3 kbp fragment (20 nt sticky ends): ODN\_36 and ODN\_38. They were subjected to PCR with a thermal cycle of [ (98 °C, 10 sec→55 °C, 30 sec→72 °C, 90 sec) × 30] in T100 Thermal Cycler. After the reaction, samples were irradiated with 365 nm light at an intensity of 4 mW/cm<sup>2</sup> for 15 min using a MAX-350 compact xenon light source. After alcohol precipitation, 0.8% agarose gel electrophoresis and gel extraction were performed using the Wizard SV Gel and PCR Clean-UP System (Promega) to obtain the target DNA fragments.

The above obtained DNA fragments were used for ligation experiment. Samples were prepared with 10 nM 2 kbp DNA fragment, 15 nM 3 kbp DNA fragment, 0.2 mM dNTP in 1 × T4 DNA ligase buffer in a total volume of 30 µL. The DNA was then annealed at [80 °C, 5 min→-0.02 °C/sec to 15 °C] using T100 Thermal Cycler. This was divided into three equal parts, each with a volume of 10 µL. To one part, 0.2 µL of T4 DNA ligase (New England Biolabs, 2000 U/µL) was added, resulting in the Polymerase (-) Ligase (+) sample. To another part, 0.2 µL of both T4 DNA ligase and T4 DNA polymerase (New England Biolabs, 3 U/µL) was added, resulting in the Polymerase (+) Ligase (+) sample. The remaining part was left without any additions, resulting in the Polymerase (-) Ligase (-) sample. The samples were incubated at 16°C for 2 hours. After the reaction, 0.5 µL of Klenow Fragment (3'→5' exo-) (New England Biolabs, 50 U/µL) was added to each sample and incubated at 37 °C for 30 minutes and 68 °C for 10 minutes. The reaction solution was analyzed by 0.8% agarose gel. Each band was detected as fluorescence of FAM labeling of primer using a ChemiDoc Touch MP imaging system.

#### **Ligation of 2 kbp and 3 kbp DNA fragments by Golden Gate assembly**

PCR samples were prepared with 0.2 µM primer, 0.25 ng/µL λ phage genome, 0.2 mM dNTPs, 0.04 U/µL Phusion High Fidelity in 1 × Phusion High Fidelity buffer in a total volume of 50 µL. The primer combinations were as follows; 2 kbp fragment: ODN\_33 and ODN\_39, 3 kbp fragment: ODN\_36 and ODN\_40. They were subjected to PCR with a thermal cycle of [ (98 °C, 10 sec→55 °C, 30 sec→72 °C, 90 sec) × 30] in T100 Thermal Cycler. After the reaction, the DNA was purified with the Wizard SV Gel and PCR Clean-Up System.

Golden Gate Assembly was performed using the obtained DNA fragments. Samples were prepared with 10 nM 2 kbp DNA fragment, 15 nM 3 kbp DNA fragment in 1 × T4 DNA ligase buffer in a total volume of 20 µL. They were divided into two equal parts, each with a volume of 10 µL. One was added 0.25 µL of T4 DNA ligase (2000 U/µL) and 0.25 µL of Bsa I HFv2 (New England Biolabs, 20 U/µL) as Ligase (+), and the other was left without any addition as Ligase (-). The samples were subjected to a thermal cycle of [ (37 °C, 1 min→16 °C, 2 min) × 30]. After the reaction, the reaction solution was analyzed by 0.8% agarose gel. Each band was detected as fluorescence of FAM labeling of primer using a ChemiDoc Touch MP imaging system.

#### **Plasmid construction with stop primer and confirmation by colony formation**

PCR samples were prepared with 0.3 µM stop primer, 0.2 ng/µL plasmid, 0.2 mM dNTPs, 0.04 U/µL Phusion High Fidelity in 1 × Phusion High Fidelity buffer in a total volume of 400 µL. The primer combinations were as follows; fragment\_LacZ: ODN\_41 and ODN\_42, fragment\_AMPr: ODN\_43 and ODN\_44. The following plasmids were used as template; fragment\_LacZ: pSV-β-Galactosidase Control Vector (Promega), fragment\_AMPr: pUC19. The prepared samples were divided into two

equal parts, each with a volume of 200  $\mu\text{L}$ . One was irradiated with 365 nm light at an intensity of 4  $\text{mW}/\text{cm}^2$  for 15 minutes using a MAX-350 compact xenon light source, designated as UV (+), and the other was UV (-). They were subjected to PCR with a thermal cycle of [ (98 °C, 10 sec→55 °C, 30 sec→72 °C, 90 sec)  $\times$  35] in T100 Thermal Cycler. After the reaction, 20  $\mu\text{L}$  of 10  $\times$  CutSmart Buffer and 2  $\mu\text{L}$  of Dpn I (20 U/ $\mu\text{L}$ , New England BioLabs) were added and incubated at 37 °C for 2 hours. The UV (-) was then irradiated with 365 nm light at an intensity of 4  $\text{mW}/\text{cm}^2$  for 15 minutes. After alcohol precipitation, 0.8% agarose gel electrophoresis was performed, and gel extraction was performed using the Wizard SV Gel and PCR Clean-UP System to obtain the target DNA fragments. The obtained DNA fragments were used for ligation experiments. Samples were prepared in a total volume of 10  $\mu\text{L}$  with 18 nM fragment\_LacZ, 2 nM fragment\_AMPr, 0.2 mM dNTP in 1  $\times$  T4 DNA ligase buffer. The prepared samples were annealed using T100 Thermal Cycler at [80 °C, 5 min→0.02 °C/sec to 15 °C]. Then, 0.2  $\mu\text{L}$  of T4 DNA polymerase (3 U/ $\mu\text{L}$ ) and 0.2  $\mu\text{L}$  of T4 DNA ligase (2000 U/ $\mu\text{L}$ ) were added and incubated at 16 °C for 2 hours. After the reaction, 3  $\mu\text{L}$  of the reaction solution was added to 30  $\mu\text{L}$  of ECOSTM Competent *E. coli* JM109 (NIPPON GENE) and kept on ice for 45 minutes, followed by heat shock at 42 °C for 2 minutes. 200  $\mu\text{L}$  of LB medium was added to the sample, mixed, and precultured at 37 °C for 20 min. Centrifuged at 8000 rpm for 5 min, the supernatant was removed and resuspended in 50  $\mu\text{L}$  of medium and cultured on agar medium (0.1 mg/mL ampicillin, 0.05 mg/mL X-gal, 0.4 mM IPTG) for 24 h.

#### **Sequence analysis of constructed plasmid**

Blue colonies were placed in 3 mL of LB medium with ampicillin (100  $\mu\text{g}/\text{mL}$ ) and shaken at 180 rpm for 15 h at 37°C. Plasmids were extracted using the Wizard<sup>®</sup> Plus SV Minipreps DNA Purification System.

Samples used for sequence analysis were prepared with 0.5  $\mu\text{M}$  primer and 40 ng/ $\mu\text{L}$  plasmid in a total volume of 10  $\mu\text{L}$ . The primers used were 5'-CGTTATCCCCTGATTCTGTGGA-3' and 5'-CCACCTGACGTCTAAGAAACCA-3'. The sequencing mixtures were analyzed by 3500 Genetic Analyzer (Applied Biosystems) at Nagoya University Center for Gene Research.

#### **Hybridization of 19 kbp DNA fragments**

PCR samples were prepared with 0.1  $\mu\text{M}$  stop primer, 0.2  $\mu\text{M}$  primer, 0.25 ng/ $\mu\text{L}$   $\lambda$  phage genome, 0.2 mM dNTPs, 0.04 U/ $\mu\text{L}$  Phusion High Fidelity in 1  $\times$  Phusion High Fidelity buffer in a total volume of 200  $\mu\text{L}$ . The primer combinations were as follows; 19 kbp former: ODN\_34 and ODN\_45, 19 kbp latter: ODN\_35 and ODN\_46. The prepared samples were subjected to PCR with a thermal cycle of [ (98 °C, 10 sec→55 °C, 20 sec→72 °C, 9.5 min)  $\times$  30] in T100 Thermal Cycler. After the reaction, the samples were irradiated with 365 nm light at an intensity of 4  $\text{mW}/\text{cm}^2$  for 15 min using a MAX-350 compact xenon light source. After alcohol precipitation, 0.8% agarose gel electrophoresis and gel

extraction were performed using the Wizard SV Gel and PCR Clean-UP System to obtain the target DNA fragments.

Hybridization experiments were performed using the obtained DNA fragments. Samples were prepared with 1 nM 19 kbp former fragment, 1 nM 19 kbp latter fragment, 0.2 mM dNTP in  $1 \times$  T4 DNA ligase buffer in a total volume of 10  $\mu$ L. The prepared samples were annealed using T100 Thermal Cycler at [80 °C, 5 min  $\rightarrow$  -0.02 °C/sec to 15 °C]. The reaction solution was analyzed by 0.75% agarose gel using a pulsed-field electrophoresis system (Pippin Pulse (sage science)) at protocol 2 for 15 h.  $\lambda$  DNA-Mono Cut Mix (New England Biolabs) was used as the ladder marker. Each band was stained with ethidium bromide using the ChemiDoc Touch MP imaging system.

### **Design of multiple DNA fragments and stop primers**

We designed four DNA fragments (fragment\_1-4) and six stop primers (ODN\_48-53) to evaluate the feasibility of constructing the lambda phage genome from multiple DNA fragments. ODN\_48 and ODN\_49 possess complementary annealing regions that bridge fragment\_1 and \_2. Similarly, ODN\_50 and ODN\_51 contain complementary annealing regions that connect fragment\_2 and \_3, while ODN\_52 and ODN\_53 have complementary annealing regions linking fragment\_3 and \_4. The position and sequence of the stop primers were determined such that the length of DNA fragments was similar, and binding energy between annealing regions was as low as possible. In addition, binding specificity between annealing regions were also considered to avoid the possibility of mis-ligation in simultaneous ligation of multiple DNA fragments.

First, we extracted candidate primer regions from both strands of the lambda phage genome with the MFEprimer program. Then, we selected approximately 26,500 pairs of candidate primers having complementary annealing regions. Subsequently, we explored a suitable set of primer pairs with the help of NSGA-II, a multi-objective genetic algorithm. Specifically, we used binding energy (minimum binding energy for correct annealing regions) and binding specificity (minimum difference in binding energy between correct and incorrect annealing regions) for criteria of exploring better solutions. During the exploration, we set a maximum constraint of 16 kb for the length of each DNA fragment. The binding energy between annealing regions was calculated using the hybrid-min program from the UNAFold package.

### **Simultaneous ligation of multiple long DNA fragments**

PCR samples were prepared with 0.3  $\mu$ M primer, 0.25 ng/ $\mu$ L  $\lambda$  phage genome, 0.2 mM dNTPs, 0.04 U/ $\mu$ L Phusion High Fidelity in  $1 \times$  Phusion High Fidelity buffer in a total volume of 200  $\mu$ L. The primer combinations were as follows; fragment 1: ODN\_47 and ODN\_48, fragment 2: ODN\_49 and ODN\_50, fragment 3: ODN\_51 and ODN\_52, fragment 4: ODN\_53 and ODN\_54. The prepared samples were subjected to PCR with a thermal cycle of [(98 °C, 10 sec  $\rightarrow$  55 °C, 20 sec  $\rightarrow$  72 °C, 9.5

min) × 30] for fragment 1, 2, and 4 and [(98 °C, 10 sec→50 °C, 20 sec→72 °C, 9.5 min) ×30] for fragment 3 in T100 Thermal Cycler. After the reaction, the samples were irradiated with 365 nm light at an intensity of 4 mW/cm<sup>2</sup> for 15 min using a MAX-350 compact xenon light source. After alcohol precipitation, 0.8% agarose gel electrophoresis and gel extraction were performed using the Wizard SV Gel and PCR Clean-UP System to obtain the target DNA fragments.

Hybridization experiments were performed using the obtained DNA fragments. Samples were prepared with 1 nM DNA fragment 1-4, 0.2 mM dNTP in 1 × T4 DNA ligase buffer in a total volume of 10 µL. The prepared samples were left at room temperature or 50 °C for 7 days. Reaction solution was analyzed by 0.75% agarose gel using a pulsed-field electrophoresis system (Pippin Pulse) at protocol 2 for 15 h. Each band was stained with ethidium bromide using the ChemiDoc Touch MP imaging system.



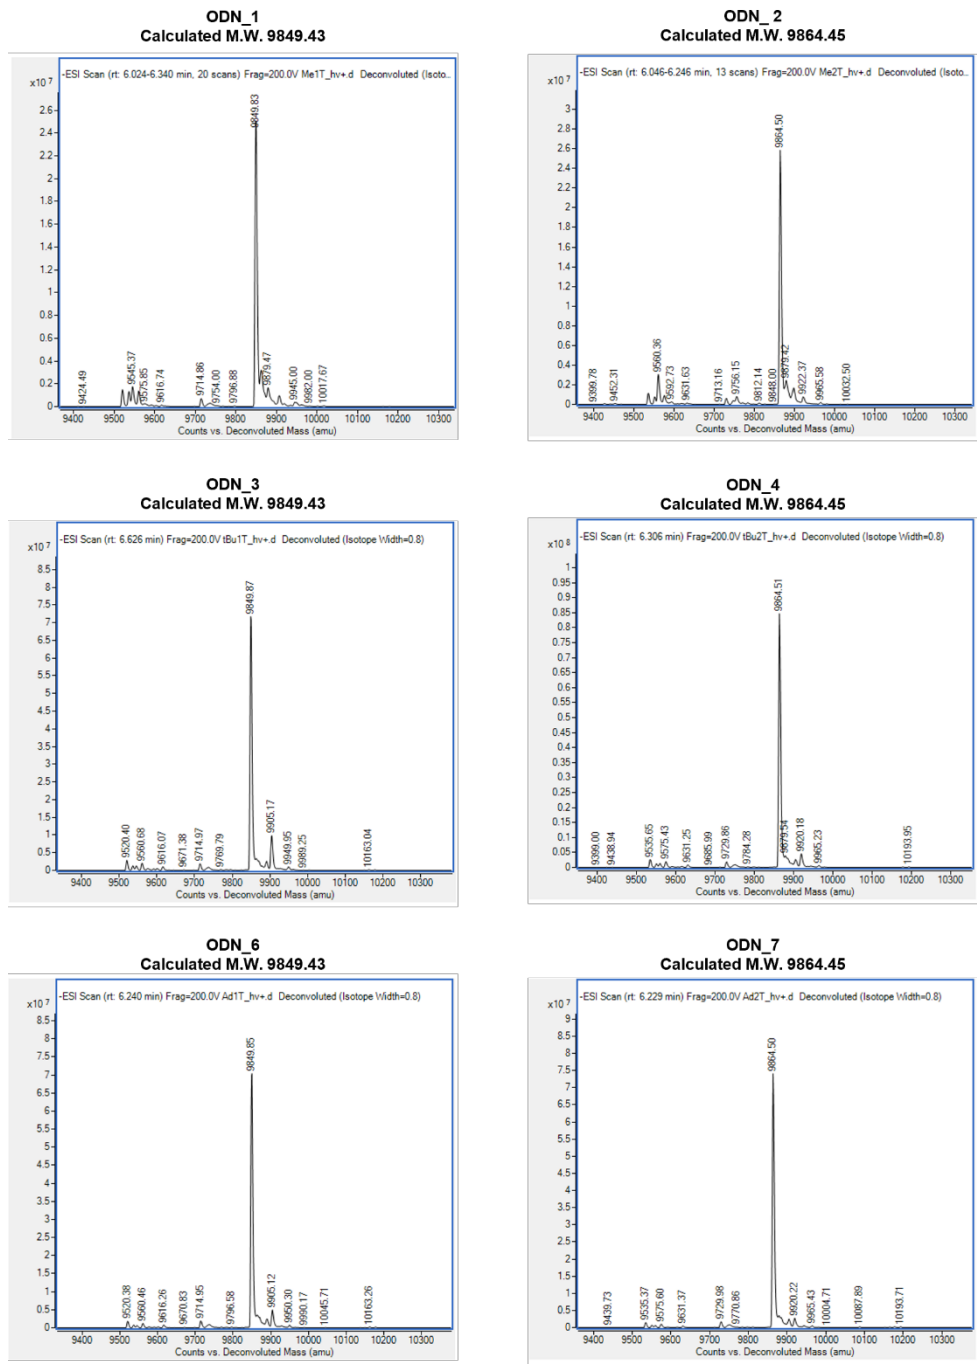

**Fig. S1** Mass spectra of photo irradiated DNA oligo. The ESI-MS analysis of photo irradiated ODN\_1-4, 6, and 7 were performed by LCMS (Agilent). The obtained mass spectra were deconvoluted by Agilent MassHunter BioConfirm Software 12.0.

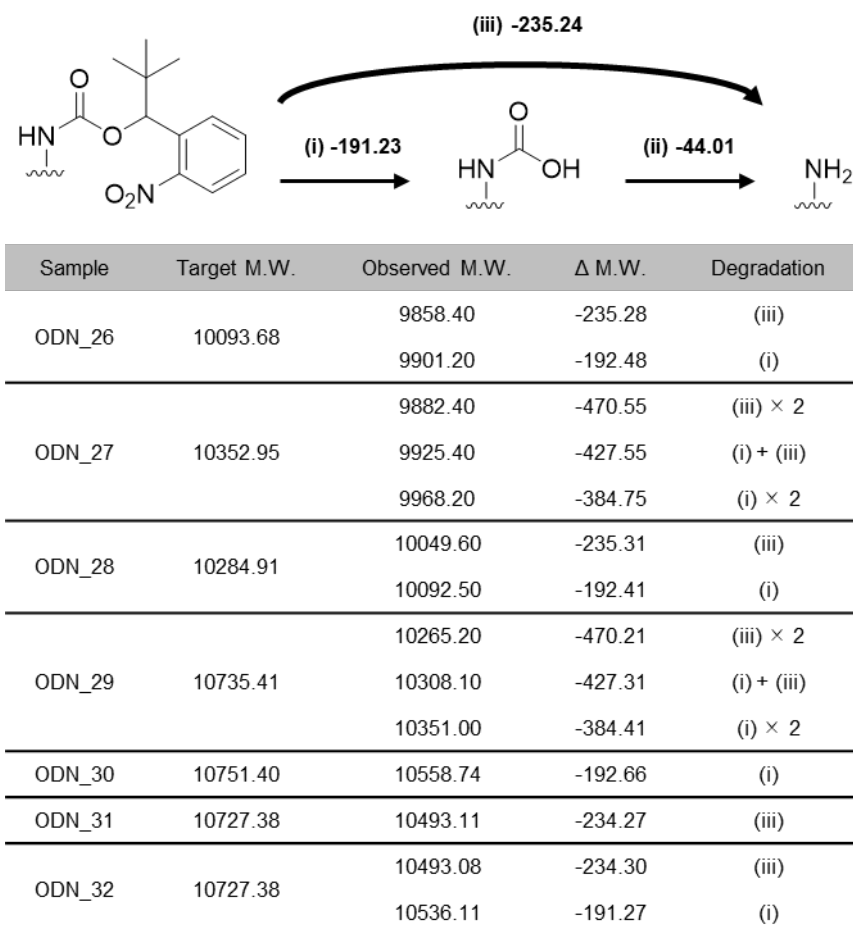

**Fig. S2** Degradation of *o*-nitrobenzyl groups by ammonia water. During deprotection after DNA synthesis, *o*-nitrobenzyl group was removed by ammonia water. This is the cause of low stopping efficiency of chain elongation in the case of using *o*-nitrobenzyl group at base part.

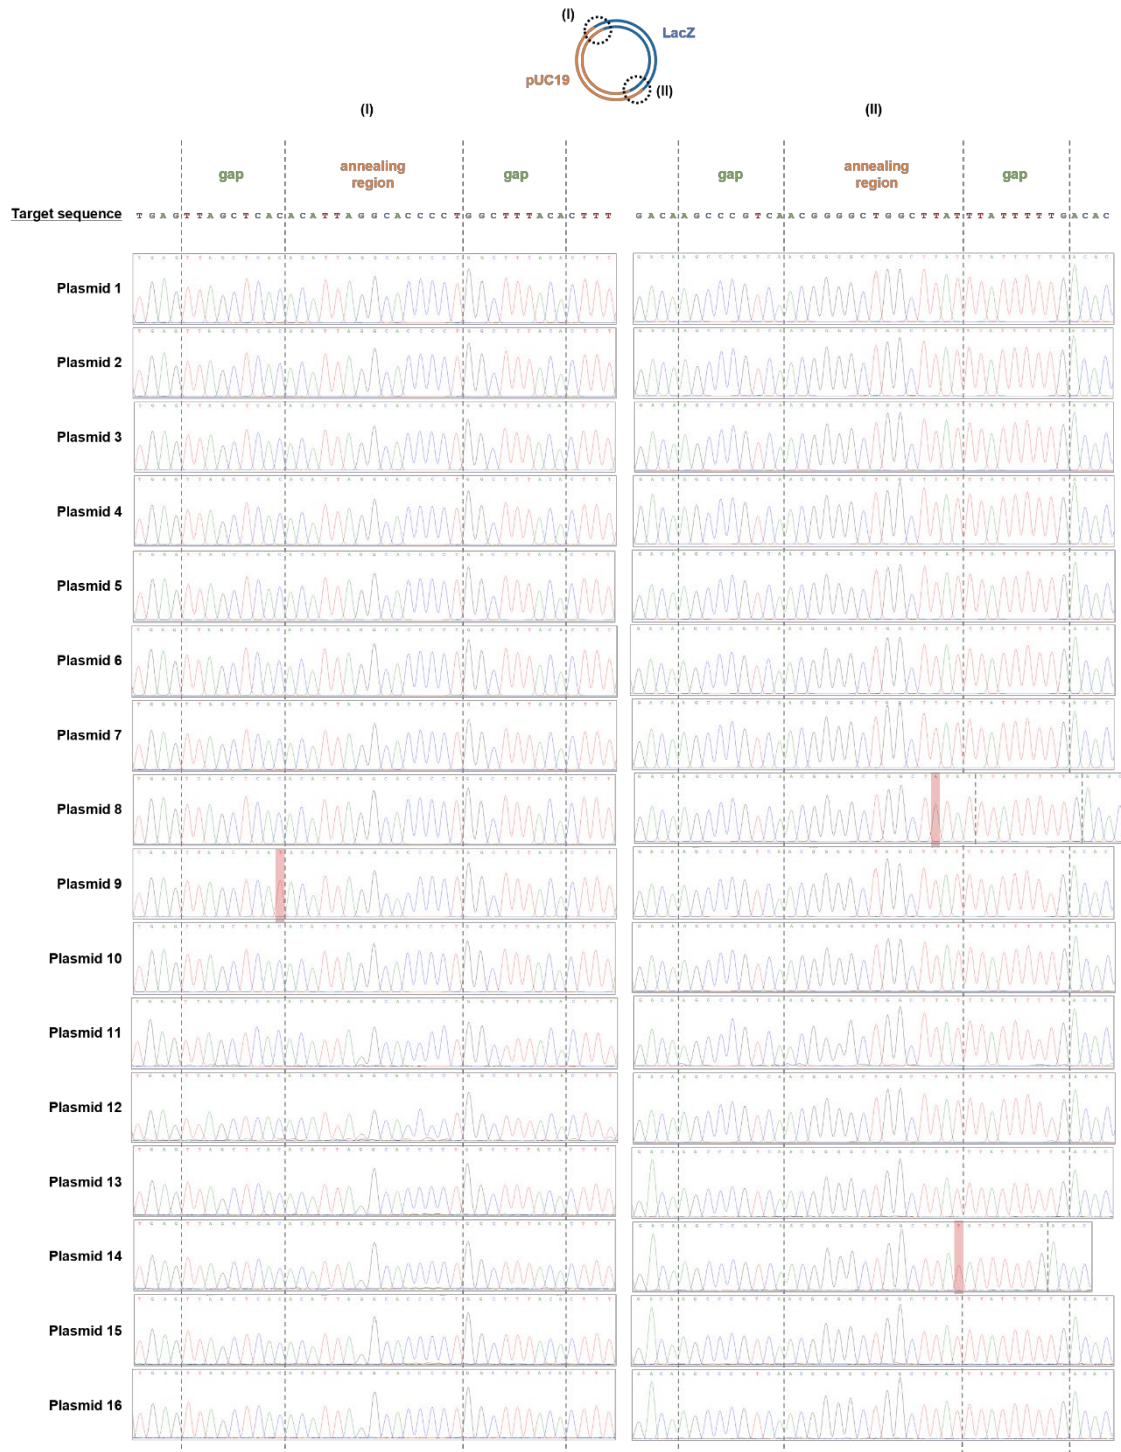

**Fig. S3** Sanger sequencing analysis of constructed plasmids. 16 blue colonies of Figure 5 were collected, and plasmids were extracted. For each plasmid, the sequences of the ligation regions were analyzed by Sanger sequencing. Areas where errors were seen are indicated in red. Plasmid 8 had an A insert in the annealing region. Plasmid 9 had a C to T mutation in the gap region. Plasmid 14 skipped two bases in the gap region.
